# Supplementary material for: Selective citation in the literature on the hygiene hypothesis: a citation analysis on the association between infections and rhinitis
Source: PubMed Central journal article supplement — BMJ Open. 2019 Feb 7;9(2):e026518. doi: 10.1136/bmjopen-2018-026518 (PMC6377569; doi:10.1136/bmjopen-2018-026518), 2019-02-07
Supplement: bmjopen-2018-026518.draft_revisions.pdf [file bmjopen-2018-026518.draft_revisions.pdf]

# BMJ Open

BMJ Open is committed to open peer review. As part of this commitment we make the peer review history of every article we publish publicly available.

When an article is published we post the peer reviewers' comments and the authors' responses online. We also post the versions of the paper that were used during peer review. These are the versions that the peer review comments apply to.

The versions of the paper that follow are the versions that were submitted during the peer review process. They are not the versions of record or the final published versions. They should not be cited or distributed as the published version of this manuscript.

BMJ Open is an open access journal and the full, final, typeset and author-corrected version of record of the manuscript is available on our site with no access controls, subscription charges or pay-per-view fees (<http://bmjopen.bmj.com>).

If you have any questions on BMJ Open's open peer review process please email [info.bmjopen@bmj.com](mailto:info.bmjopen@bmj.com)

# BMJ Open

## Selective citation in the literature on the hygiene hypothesis: a citation analysis on the association between infections and rhinitis

|                               |                                                                                                                                                                                                                                                                                                                                                                           |
|-------------------------------|---------------------------------------------------------------------------------------------------------------------------------------------------------------------------------------------------------------------------------------------------------------------------------------------------------------------------------------------------------------------------|
| Journal:                      | <i>BMJ Open</i>                                                                                                                                                                                                                                                                                                                                                           |
| Manuscript ID                 | bmjopen-2018-026518                                                                                                                                                                                                                                                                                                                                                       |
| Article Type:                 | Research                                                                                                                                                                                                                                                                                                                                                                  |
| Date Submitted by the Author: | 07-Sep-2018                                                                                                                                                                                                                                                                                                                                                               |
| Complete List of Authors:     | Duyx, Bram; Maastricht University CAPHRI School for Public Health and Primary Care,<br>Urlings, Miriam; Maastricht University CAPHRI School for Public Health and Primary Care<br>Swaen, Gerard; Maastricht University, CAPHRI Research Institute<br>Bouter, Lex; VU University Medical Center<br>Zeegers, Maurice; Maastricht University, Department of Complex Genetics |
| Keywords:                     | EPIDEMIOLGY, Paediatric infectious disease & immunisation < PAEDIATRICS, STATISTICS & RESEARCH METHODS                                                                                                                                                                                                                                                                    |
|                               |                                                                                                                                                                                                                                                                                                                                                                           |

SCHOLARONE™  
Manuscripts

Peer Review Only

1  
2  
3 **Selective citation in the literature on the hygiene hypothesis:**  
4  
5 **a citation analysis on the association between infections and rhinitis**  
6  
7

8  
9 Bram Duyx<sup>1\*</sup> [b.duyx@maastrichtuniversity.nl](mailto:b.duyx@maastrichtuniversity.nl)  
10  
11 Miriam J.E. Urlings<sup>1</sup> [mje.urlings@maastrichtuniversity.nl](mailto:mje.urlings@maastrichtuniversity.nl)  
12  
13 Gerard M.H. Swaen<sup>1</sup> [g.swaen@maastrichtuniversity.nl](mailto:g.swaen@maastrichtuniversity.nl)  
14  
15 Lex M. Bouter<sup>2,3</sup> [lm.bouter@vu.nl](mailto:lm.bouter@vu.nl)  
16  
17 Maurice P. Zeegers<sup>1,4</sup> [m.zeegers@maastrichtuniversity.nl](mailto:m.zeegers@maastrichtuniversity.nl)  
18

19  
20 <sup>1</sup> Nutrition and Translational Research in Metabolism (School NUTRIM), Maastricht  
21 University, Maastricht, The Netherlands.  
22

23  
24 <sup>2</sup> Department of Epidemiology and Biostatistics, Amsterdam University Medical Centers,  
25 Amsterdam, The Netherlands  
26

27  
28 <sup>3</sup> Department of Philosophy, Faculty of Humanities, Vrije Universiteit, Amsterdam, The  
29 Netherlands  
30

31  
32 <sup>4</sup> Care and Public Health Research Institute (School CAPHRI), Maastricht University,  
33 Maastricht, The Netherlands.  
34

35  
36 \* Corresponding author  
37

38  
39 **Conflict of Interest**

40  
41 All authors declare to have no conflict of interest.  
42  
43

44  
45 **Funding**

46  
47 This project has received funding from the Long-range Research Initiative (LRI) from the  
48 European Chemical Industry Council (CEFIC), grant no. LRI-Q3-UM. LRI had no role in study  
49 design, data collection and analysis, preparation of the manuscript, or decision to publish.  
50  
51  
52  
53

54  
55 **Word count main text:** 3,507  
56  
57

## **Abstract**

**Objective:** Our objective was to assess the occurrence and determinants of selective citation in scientific publications on Strachan's original hygiene hypothesis. His hypothesis states that lack of exposure to infections in early childhood, increases the risk on rhinitis.

**Setting:** Web of Science Core Collection.

**Participants:** We identified 110 publications in this network, consisting of 5551 potential citations.

**Primary and secondary outcome measures:** The realisation of a potential citation, measured and analysed according to the pre-registered protocol.

**Results:** We found evidence for citation bias in this field: publications with supportive were cited more often than non-supportive publications (odd ratio adjusted for study design [adjOR]: 2.2, 95% confidence interval [CI]: 1.6 - 3.1), and the same was the case for publications with mixed findings (adjOR: 3.1, CI: 2.2 - 4.5). Other relevant determinants for citation were type of exposure, specificity, journal impact factor, authority and self-citation. Surprisingly, prospective cohort studies were cited less often than other empirical studies.

**Conclusions:** There is clear evidence for selective citation in this research field, and particularly for citation bias.

### **Strengths and limitations of this study**

- this study assesses how evidence propagates regarding the hygiene hypothesis over time by analysing the likelihood of citation
- it investigates which article characteristics impact citation such as study outcome, journal impact factor, author gender and affiliation, and authority within the field
- we check whether positive studies are cited more often by other studies within the field, and in particular by reviews (which are supposed to give an unbiased overview of the literature)
- limitation: only articles related to the original hygiene hypothesis are included in this analysis

## **Background**

The hygiene hypothesis postulates that a high degree of hygiene in early life will increase the risk of developing allergies later in life (1, 2). The underlying mechanism has been the topic of scientific debate. Over time, this debate led to several adaptations and extensions of the hygiene hypothesis, which, as such, provides a good example of how science progresses. Ideally, this progress should be based on all existing evidence, but this is not always the case (3). A citation analysis can help to reveal which part of the available evidence is taken into account, and which evidence is ignored. The current study does not concern the validity of the hygiene hypothesis per se, but rather the citation relations within the scientific literature on this hypothesis.

The hygiene hypothesis was originally proposed to explain the rising prevalence of allergies, with up to 20 to 40 % of the population in developed countries being affected (4). Modern, urbanized life in developed countries generally shows higher levels of hygiene than in previous times or in developing countries. Hygiene limits exposure to infections. Exposure to infections, especially early in life, helps to develop and adapt the immune system to the environment in which we happen to live, in such a way that it learns to discriminate between harmless and harmful intruders. According to the hygiene hypothesis, it is this lack of exposure to relatively harmless intruders early in life, that causes the immune system to malfunction later in life. Hence the rise in allergies.

One of the early mechanisms proposed for this malfunction reasons as follows (5, 6). Allergy-related inflammatory reactions are mediated by Type 2 T helper (Th2) cells of the immune system that is activated by the presence of an allergen. High levels of Th2 cells generally suppress Th1 levels and vice versa. Curiously, however, prevalence of Th1-induced inflammatory bowel disease and auto-immune disease has also increased in developed countries. This suggests that a different process must take place.

1  
2  
3 The hygiene hypothesis has been amended several times since its early days and gave  
4  
5 rise to newer theories such as the '*old friends hypothesis*' (7, 8). This is an adaptation of the  
6  
7 original hygiene hypothesis. It states that it is not hygiene per se that is causing the rise in  
8  
9 allergy prevalence, but the lack of exposure to *some specific* infections, and also to the gut  
10  
11 microbiome and to non-viable intruders from the natural environment, such as endotoxins.  
12  
13 Humans have been exposed to these 'old friends' for many centuries and our immune system  
14  
15 has co-evolved in their presence. As a result, our immune system has become dependent on the  
16  
17 presence of these old friends in order to develop and function properly. Similarly, this adapted  
18  
19 hygiene hypothesis states that lack of exposure to these old friends may give rise not only to  
20  
21 allergies, but to auto-immune diseases as well.  
22  
23

24 The original hygiene hypothesis and its later adaptations have a lot in common, and  
25  
26 much of the evidence that is supportive for one hypothesis is equally supportive for the others.  
27  
28 However, this is not always the case. In our project, publications are classified as either  
29  
30 supportive or unsupportive with regards to a hypothesis. For that reason it is important to  
31  
32 precisely define the investigated hypothesis.  
33  
34

35 In our citation network, we focus on the hygiene hypothesis as it was originally stated by  
36  
37 Strachan, and not on later modifications (1, 2). This allows us to investigate the development  
38  
39 of this hypothesis from the start. Concretely, this means that we focus on the impact of  
40  
41 infections and the number of siblings on the development of rhinitis, like in Strachan's original  
42  
43 study (2). We included the effects of all viral and bacterial infections. However, we excluded  
44  
45 exposure to helminth infections, because different versions of the hygiene hypothesis predict  
46  
47 contradictory effects due to their impact on Th2 cells. Indirect proxies for infection that were not  
48  
49 part of the original hypothesis, such as growing up on a farm or daycare attendance, were also  
50  
51 excluded.  
52  
53  
54  
55  
56  
57  
58  
59  
60

1  
2  
3 Our main research question is: *Which determinants influence the likelihood of being*  
4 *cited in the scientific literature on the original hygiene hypothesis?* To answer this question, we  
5 assessed the impact of a number of determinants that we had investigated earlier in another  
6 citation network (9). Of particular importance is the occurrence of citation bias: the phenomenon  
7 that supportive, hypothesis-confirming studies have a higher likelihood of being cited than non-  
8 supportive or critical studies (10).  
9  
10  
11  
12  
13  
14  
15  
16  
17  
18  
19

## 20 **Method**

21  
22 Prior to performing the citation network analysis, we described our methods in a study  
23 protocol and stored it at an online repository (11). (Protocol deviations are described in the  
24 supplement, Text S1.) In brief, we applied a search strategy to the Web of Science Core  
25 Collection (WoSCC), identified relevant literature, downloaded these records with their  
26 reference lists, extracted data for each publication, built a dataset with potential citation paths  
27 and used specialised software to determine which citations had occurred. These steps will be  
28 explained in more detail below. Article selection and data extraction were performed  
29 independently by MJEU and BD. Disagreements were resolved in a consensus meeting.  
30  
31  
32  
33  
34  
35  
36  
37  
38

39 For clarification: we use the words *cited* and *citing* to differentiate between the older  
40 publication that may have been cited by a more recent, citing publication. Thus, when we write  
41 about cited publications, citing publications, and citation paths, we actually mean *potentially*  
42 cited publications, *potentially* citing publications and *potential* citation paths, as these potential  
43 citations may or may not be realised.  
44  
45  
46  
47  
48  
49  
50  
51  
52  
53  
54  
55  
56  
57  
58  
59  
60



## Search strategy

First, we took Strachan's seminal article in which the hygiene hypothesis was launched as point of departure (2). Next, we identified all literature within WoSCC referring to this article. Finally, we limited the output to publications that mentioned hay fever in their title, keywords or abstract ("*hay fever*" OR "*hayfever*" OR "*hay-fever*" OR "*rhinitis*" OR "*rhino\**"). The search was performed by BD and updated until 16 August 2017. Only English language publications were included.

The search output was then limited to publications that investigated exposures related to the original hygiene hypothesis. This means that only publications investigating the effect of *number of siblings* and *infection history* were included. Helminths infections were excluded, as their impact is likely to be Th2 rather than Th1 mediated, and different versions of the hygiene hypothesis would make contradictory predictions regarding their impact on allergies. Both empirical and non-empirical publications were included.

## Data extraction

A range of variables were extracted or derived from each included publication: *content-related publication characteristics* (i.e. type of exposure, publication type and study design, sample size, specificity, study outcome), *content-unrelated publication characteristics* (conclusiveness of the title, funding source, number of authors, number of affiliations, number of references), *journal characteristics* (publisher, journal impact factor), *author characteristics* (gender, country, and affiliation of the corresponding author), and *citation characteristics* (within-network authority, self-citation). More details on these characteristics and how we scored them can be found in the supplement (Text S2). In principle, all characteristics were treated as determinant in the statistical analysis.

## Statistical analysis

The dataset consisted of all potential citation paths between cited and citing publications. A potential citation path means that the cited publication is published before submission of the citing publication. The underlying assumption is that publications can only refer to other publications up to the date of their submission, and that they can only be cited from their publication date onwards. All analyses were pre-registered in the study protocol unless mentioned otherwise.

**Impact of the cited publication characteristics.** Our dependent variable was citation, or, in other words, whether a potential citation path was realised or not. We used the built-in algorithm of CitNetExplorer to determine whether a citation had occurred (12). This algorithm makes use of reference lists that can be downloaded from the Web of Science Core Collection. The reference lists of all publications in the network were linked by the algorithm with the actual publications in the network. If possible, this linkage was done by DOI, the unique Digital Object Identifier assigned to most present-day publications; otherwise it was based on a combination of first author's surname, first author's first initial, publication year, volume number and first page number. The determinants of citation in our analyses were the characteristics of the cited publication as described above.

Since each publication could refer to multiple other publications, the potential citation paths were related. Therefore we used a multilevel approach in which the potential citations were nested under the citing publication. Specifically, we performed a univariate random-effects logistic regression for each determinant of citation. We repeated these analyses while adjusting for study design, as a proxy for study quality. Another proxy for study quality would be the study sample size. However, as reviews do not have a sample size, this adjusted analysis could

1  
2  
3 only be performed on the sub-selection of cited empirical publications so we did not adjust for  
4  
5 sample size in the main analysis.

6  
7 The outcomes of the logistic regression analyses are reported as odds ratios. The odds  
8  
9 ratio may overestimate the true relative risk in studies where the outcome is a common (13). In  
10  
11 our network, citation is not a common outcome and consequently the overestimation of the true  
12  
13 relative risk will be small.

14  
15  
16 In addition to the original analysis plan in the protocol, we also calculated the explained  
17  
18 variance of the adjusted models, so that these models are easier to compare. For this purpose we  
19  
20 calculated McFadden's  $R^2$ .

21  
22 **Additional analyses** were performed on sub-selections of the network: a) only cited  
23  
24 empirical publications were included (to investigate which empirical evidence is picked up by  
25  
26 the rest of the field; explorative analysis); b) only cited empirical publications and citing  
27  
28 synthesis publications were included (to investigate which empirical evidence is picked up  
29  
30 particularly by reviews and editorials). These analyses were adjusted not only for study design  
31  
32 but also for log-transformed sample size because all cited publications had a sample size in  
33  
34 these sub-selections.

35  
36  
37 To check the robustness of our findings we also ran some sensitivity analyses in which  
38  
39 the following publications or citation paths were excluded: c) the most cited publications  
40  
41 (explorative analysis); d) citation paths with less than one year between publication date of the  
42  
43 cited publication and submission date of the citing publication were excluded (to check if a lag  
44  
45 time would make a difference as it takes some time before most publications are known and  
46  
47 have an impact); e) citing publications that have less than ten potential citations.

48  
49  
50 **Concordance analysis.** Where applicable, we also calculated whether the cited and the  
51  
52 citing publications had the same characteristics (*concordance*). This would for instance be the  
53  
54 case if supportive publications would prefer to cite other supportive publications, and if non-  
55  
56

1  
2  
3 supportive publications would prefer to cite other non-supportive publications. If citation would  
4  
5 be based on the concordance of study outcome, it would be another measure of citation bias. To  
6  
7 test if concordance on several characteristics has an impact on the likelihood of citation,  
8  
9 univariate and adjusted (for study design) fixed-effects logistic regression analyses were  
10  
11 applied.  
12

### 13 14 15 **Software**

16  
17 We used the built-in algorithm of CitNetExplorer 1.0.0 to extract the actual citations  
18  
19 between publications (12). We used R 3.2.4 to create a dataset with all potential citation paths,  
20  
21 based on the data extraction sheet and the actual citations, and also to calculate the within-  
22  
23 network authority, self-citation score, and time to citation for each potential citation path.  
24  
25 Finally, we used Stata 13.1 to analyse the results.  
26  
27  
28  
29  
30

### 31 **Patient and public involvement**

32  
33 No patients were involved in this study.  
34  
35  
36

### 37 **Results**

38  
39 A total number of 110 publications were identified that fit our criteria, published between 1995  
40  
41 and 2017 (Figure 1, Text S3). Of these, 28 publications focused exclusively on the impact of  
42  
43 household size on rhinitis, 48 on the impact of having had infections, and 34 on the impact of  
44  
45 both types of exposure. This network of 110 publications comprised a total of 5551 potential  
46  
47 citation paths, of which 7% was realised. Their main characteristics are depicted in Table 1 (for  
48  
49 more details see Table S1). About two thirds of all publications in the network are empirical  
50  
51 studies (39 cross-sectional, 4 case control, 29 cohort studies, and 1 intervention), one third are  
52  
53 reviews (27 narrative reviews, 2 systematic reviews, and 8 editorials or leading articles). The  
54  
55  
56  
57  
58  
59  
60

1  
2  
3 study outcome for 35 of the publications was mixed or unclear. Of the remaining publications  
4  
5 with a clear study outcome, about 50 % was supportive of the hygiene hypothesis (41  
6  
7 publications with an inverse association between siblings / infection and rhinitis), and about 50  
8  
9 % was non-supportive (34 publications with no association, or with a positive association). The  
10  
11 number of citations ranged from 0 (45 publications) to 35, with a median of 1 citation per  
12  
13 publication. A ranking of the most cited publications and authors can be found in Table S2.  
14

15  
16 **Impact of the cited publication characteristics.** The results of the regression analyses  
17  
18 are presented in Table 2. Empirical publications were cited more often than non-empirical  
19  
20 publications. Compared to empirical studies with a cross-sectional design, prospective cohort  
21  
22 studies, narrative reviews and editorials had a lower likelihood of citation, while the two  
23  
24 systematic reviews had a higher likelihood of citation. Other determinants that increased the  
25  
26 likelihood of citation were specificity, journal impact factor, sample size and within-network  
27  
28 authority. Sample size had a modest impact on citation. Publications on only one type of  
29  
30 exposure were cited less often than publications on both types of exposure.  
31

32  
33 Supportive publications had a higher likelihood of being cited than non-supportive  
34  
35 publications. This is in line with our hypothesis. However, publications with mixed results were  
36  
37 cited even more often. This may be due to our scoring algorithm. After all, if a publication  
38  
39 investigated both the number of siblings and the infection history, and it reported dissimilar  
40  
41 outcomes for these two exposures, then this publication would have been scored as having  
42  
43 mixed results. An explorative chi-square test confirmed that type of exposure and study outcome  
44  
45 were related ( $\chi^2(4) = 52, p < 0.0005$ ), with 71% of all publications on both types of exposure  
46  
47 reporting mixed results, compared to 4% of the publications on only number of siblings and  
48  
49 21% of the publications on only infection history. As double exposure studies are also cited  
50  
51 more often compared to the single exposure studies, type of exposure should be considered as a  
52  
53 confound of study outcome. To correct for this, we performed an explorative random-effects  
54  
55  
56  
57  
58  
59  
60

1  
2  
3 logistic regression of citation on study outcome, adjusted for both study design and type of  
4 exposure. It showed that supportive publications had the highest chance of being cited (adjusted  
5 odds ratio [adjOR] 3.1, 95% confidence interval [CI] 2.2-4.3), compared to publications with  
6 mixed results (adjOR 2.4, CI 1.5-3.7) and with non-supportive results (reference category;  
7 model  $R^2 = 0.12$ ).  
8  
9  
10  
11  
12

13 Surprisingly, publications with a conclusive title were less likely to receive citations. The  
14 format of the title may be prescribed by the journal regulations. We ran some explorative  
15 analyses in which we additionally adjusted for the (log-transformed) journal impact factor or  
16 publisher on top of study design. The impact of title conclusiveness remained high when  
17 additionally adjusted for journal impact factor (adjOR 0.4, CI 0.2-0.6) or publisher (adjOR 0.3,  
18 CI 0.2-0.6).  
19  
20  
21  
22  
23  
24  
25

26 The above results are related to the network as a whole. Of particular importance is how  
27 empirical, evidence-generating publications are cited by the rest of the network. We repeated the  
28 above analyses on a sub-set of the cited publications, namely the empirical publications; we  
29 tested which characteristics of empirical publications were related to their likelihood of being  
30 cited. The results (Table S3) are very similar to the analyses on the complete network that  
31 include the cited non-empirical publications.  
32  
33  
34  
35  
36  
37  
38

39 Likewise, we tested how *empirical* publications are cited by *synthesis* publications  
40 (Table S4). Again, the direction and magnitudes of the effects were all very similar, except for  
41 study outcome. Adjusted for study design, (log-transformed) sample size and type of exposure,  
42 supportive empirical publications were much more likely to be cited (adjusted OR 7.3, CI 3.5-  
43 15.5) by reviews and editorials, whereas empirical publications with mixed results seemed less  
44 likely to be cited (adjusted OR 0.4, CI 0.2-0.9) compared to non-supportive empirical  
45 publications (reference category; model  $R^2 = 0.12$ ). As a side note: these analyses are based on a  
46 smaller number of cited and citing publications and should be interpreted with caution.  
47  
48  
49  
50  
51  
52  
53  
54  
55  
56  
57  
58  
59  
60

1  
2  
3 The sensitivity analyses without the four most cited publications showed some dissimilar  
4 results (Table S5). The impact of study outcome decreased, the impact of male authors and of  
5 North-American authors disappeared, and the impact of case-control studies reversed. The other  
6 two sensitivity analyses (with a one year lag time immediately after publication; without citing  
7 publications with less than 10 potential citation paths) all showed similar results as the main  
8 analyses (Tables S6-S7).

9  
10  
11  
12  
13  
14  
15  
16 **Concordance analysis.** In addition, we tested whether publications were more likely to  
17 be cited by publications with similar characteristics. The results are shown in Table 3. It shows  
18 that publications tend to be cited mostly by publications with the same type of exposure, with a  
19 similar study outcome, with a corresponding author from the same region, and with one or more  
20 authors in common ('self-citation').  
21  
22  
23  
24  
25  
26  
27  
28  
29  
30

### 31 **Discussion**

32  
33 Our research aim was to evaluate which determinants influence the likelihood of being cited in  
34 the scientific literature on the original hygiene hypothesis stated by David Strachan (2). We  
35 found that study outcome, type of exposure, study design, specificity, title conclusiveness,  
36 journal impact factor, and the authors' region, affiliation, authority and self-citation all have a  
37 substantial impact on the likelihood of citation.  
38  
39  
40  
41  
42  
43  
44

45 With regard to study outcome, supportive publications are cited more than three times  
46 more often than non-supportive publications, while publications with mixed results are cited  
47 more than two times as often. Similarly, publications are more likely to refer to other  
48 publications with the same study outcome rather than to those that provide counter-evidence to  
49 their conclusion. This is a clear sign of citation bias.  
50  
51  
52  
53  
54  
55

56 The magnitude of citation bias even increases if we focus on how empirical publications,  
57  
58  
59  
60

1  
2  
3 which generate new evidence, are cited by reviews and editorials, which summarise and pass on  
4 existing evidence. These reviews and editorials are up to 8 times more likely to cite supportive  
5 publications rather than to non-supportive ones. As reviews are generally assumed to give an  
6 unbiased summary of the existing evidence, and as such are held in high regard, this is a  
7 worrying finding.  
8  
9  
10  
11  
12

13  
14 In our analyses we consider study design as a proxy for study quality. We believe  
15 systematic reviews to be of higher quality than narrative reviews and editorials, and thus to  
16 receive more citations. In our network, this is indeed the case. Similarly, we believe that cohort  
17 studies outrank cross-sectional and case-control studies but to our surprise they are less likely to  
18 be cited. Prospective cohort studies, even though they provide the highest type of evidence in  
19 this network, receive the fewest citations of all empirical study designs. This may be due to the  
20 fact that these cohort studies tend to focus on multiple risk factors of which only one or two are  
21 relevant for the hygiene hypothesis. But the fact that multiple risk factors are investigated in  
22 these cohort studies does not imply that their findings on the impact of siblings or infections are  
23 of any lesser value or should be ignored.  
24  
25  
26  
27  
28  
29  
30  
31  
32  
33  
34  
35  
36

37 Another surprising result is related to the title conclusiveness. Publications with titles  
38 that state a clear conclusion are cited much less often than publications with vague titles. This  
39 seems to be unrelated to the journal, publisher, impact factor, specificity, type of exposure and  
40 study outcome. As such, it remains an open question as to why this is the case, and whether this  
41 finding is specific for this network or a more general phenomenon.  
42  
43  
44  
45  
46  
47

48 This study has several limitations. First, it includes two overlapping subnetworks, as is  
49 shown by the high odds ratio in the concordance analysis of type of exposure. This makes it  
50 difficult to infer for which result a certain publication was cited. Related to this issue, the pre-  
51 registered operationalization of study outcome could not be applied because of the hybrid nature  
52  
53  
54  
55  
56  
57  
58  
59  
60



1  
2  
3 of the network, so we developed a scoring system that fits better. Finally, there are different  
4  
5 versions of the hygiene hypothesis, and support for one version may not be supportive for  
6  
7 another one. We dealt with this issue by limiting ourselves to Strachan's original hygiene  
8  
9 hypothesis, and by excluding any determinants with conflicting predictions in different versions.  
10  
11 Despite these limitations, sensitivity analyses show that the results seem robust against chance  
12  
13 findings.  
14  
15

16  
17 To conclude, there is evidence for selective citation in this network. Several  
18  
19 characteristics of a publication can make it more likely to be cited such as the authority and the  
20  
21 region of the author, the impact factor of the journal, the way in which the title was stated, and  
22  
23 also study design and study outcome. The fact that positive publications are cited more often  
24  
25 than negative ones, particularly if we look at how empirical publications are being picked up by  
26  
27 the rest of the network, is a clear sign of citation bias. Finally, this study also shows that  
28  
29 particularly narrative reviews may have a preference to refer to supportive evidence.  
30  
31  
32  
33  
34

#### 35 **Availability of data and material:**

36  
37 The protocol and the data of this study are available in the dataverse repository,  
38  
39 <http://hdl.handle.net/10411/ZKGGOG>, or by sending an email request to  
40  
41 b.duyx@maastrichtuniversity.nl.  
42  
43  
44

#### 45 **Author Contributions:**

46  
47 BD developed and performed the search strategy, wrote the R scripts for data transformation  
48  
49 and calculation, conducted the analyses and wrote the manuscript. BD and MJEU performed the  
50  
51 article selection and data extraction. MPZ and GMHS obtained funding. All authors were  
52  
53 involved in the research design and data analysis plan, and read, commented on and approved  
54  
55 the final manuscript.  
56  
57  
58  
59  
60

**Transparency declaration:**

The guarantor affirms that the manuscript is an honest, accurate, and transparent account of the study being reported; that no important aspects of the study have been omitted; and that any discrepancies from the study as planned and registered have been explained in the supplement.

**Copyright statement:**

This is an Open Access article distributed in accordance with the terms of the Creative Commons Attribution (CC BY 4.0) license, which permits others to distribute, remix, adapt and build upon this work, for commercial use, provided the original work is properly cited. See: <http://creativecommons.org/licenses/by/4.0/>.

**References**

1. Strachan D. Family size, infection and atopy: the first decade of the 'hygiene hypothesis'. *Thorax*. 2000;55(suppl 1):S2-10.
2. Strachan DP. Hay-fever, hygiene, and household size. *BMJ*. 1989;299(6710):1259-60.
3. Song F, Parekh S, Hooper L, Loke YK, Ryder J, Sutton AJ, et al. Dissemination and publication of research findings: An updated review of related biases. *Health Technol Assess*. 2010;14(8):1-193.
4. Platts-Mills TAE. The allergy epidemics: 1870-2010. *J Allergy Clin Immunol*. 2015;136(1):3-13.

- 1  
2  
3 5. Rook G. The Hygiene Hypothesis. The Biomedical & Life Sciences Collection.  
4  
5 London: Henry Stewart Talks Ltd; 2007.  
6
- 7 6. Yazdanbakhsh M, Kremsner PG, van Ree R. Allergy, Parasites, and the Hygiene  
8  
9 Hypothesis. *Science*. 2002;296(5567):490-4.  
10
- 11 7. Rook GA. Regulation of the immune system by biodiversity from the natural  
12  
13 environment: An ecosystem service essential to health. *Proc Natl Acad Sci U S A*.  
14  
15 2013;110(46):18360-7.  
16
- 17 8. Rook GA. Evolution, human-microbe interactions and the "epidemic" of  
18  
19 inflammation-related disorders (alias: the hygiene hypothesis). The Biomedical & Life  
20  
21 Sciences Collection: Henry Stewart Talks Ltd, London; 2016.  
22
- 23 9. Duyx B, Urlings MJE, Swaen GMH, Bouter LM, Zeegers MP. Selective citation in the  
24  
25 literature on swimming in chlorinated water and childhood asthma: a network analysis.  
26  
27 *Research Integrity and Peer Review*. 2017;2(1):17.  
28
- 29 10. Duyx B, Urlings MJE, Swaen GMH, Bouter LM, Zeegers MP. Scientific citations favor  
30  
31 positive results: a systematic review and meta-analysis. *J Clin Epidemiol*. 2017;88:92-101.  
32
- 33 11. Duyx B, Urlings MJE, Swaen G, Bouter LM, Zeegers MP. Protocol for citation analysis  
34  
35 of the published literature on the hygiene hypothesis 2017 [Available from: Dataverse  
36  
37 <http://hdl.handle.net/10411/ZKGGOG>.  
38
- 39 12. van Eck NJ, Waltman L. CitNetExplorer: A new software tool for analyzing and  
40  
41 visualizing citation networks. *Journal of Informetrics*. 2014;8(4):802-23.  
42
- 43 13. Cummings P. The relative merits of risk ratios and odds ratios. *Archives of*  
44  
45 *pediatrics & adolescent medicine*. 2009;163(5):438-45.  
46  
47  
48  
49  
50  
51  
52  
53  
54  
55  
56  
57  
58  
59  
60

**Table 1. Main characteristics of all 110 publications in hygiene hypothesis network.**

| Characteristic                                   | category                   | N publications | n potential citations | n realised citations (%) |
|--------------------------------------------------|----------------------------|----------------|-----------------------|--------------------------|
| Type of Exposure                                 | only Number of Siblings    | 28             | 1512                  | 100 (7%)                 |
|                                                  | only Infection History     | 48             | 1946                  | 144 (7%)                 |
|                                                  | both Siblings & Infections | 34             | 2093                  | 148 (7%)                 |
| Study Outcome                                    | supportive                 | 41             | 2322                  | 198 (9%)                 |
| Exposure - Rhinitis                              | mixed results              | 35             | 1913                  | 129 (7%)                 |
|                                                  | non-supportive             | 34             | 1316                  | 65 (5%)                  |
| Publication Type / Study Design                  | Empirical                  | 73             | 3517                  | 337 (10%)                |
|                                                  | cross-sectional            | 39             | 1697                  | 179 (11%)                |
|                                                  | case-control               | 4              | 249                   | 36 (14%)                 |
|                                                  | cohort                     | 29             | 1535                  | 121 (8%)                 |
|                                                  | -retrospective             | 15             | 817                   | 89 (11%)                 |
|                                                  | -prospective               | 14             | 718                   | 32 (4%)                  |
|                                                  | intervention               | 1              | 36                    | 1 (3%)                   |
|                                                  | Synthesis                  | 37             | 2034                  | 55 (3%)                  |
|                                                  | narrative review           | 27             | 1423                  | 16 (1%)                  |
| systematic review                                | 2                          | 80             | 20 (25%)              |                          |
| editorial, etc                                   | 8                          | 531            | 19 (4%)               |                          |
| Sample Size<br>(cat; for empirical publications) | low (1 – 999)              | 24             | 909                   | 56 (6%)                  |
|                                                  | medium (1000 – 7999)       | 25             | 1327                  | 143 (11%)                |
|                                                  | high (>= 8000)             | 24             | 1281                  | 138 (11%)                |
| Journal Impact Factor (cat)                      | 0 - 2                      | 28             | 1275                  | 27 (2%)                  |
|                                                  | 2 - 4                      | 41             | 2087                  | 145 (7%)                 |
|                                                  | >= 4                       | 32             | 1671                  | 176 (11%)                |
| Gender                                           | male                       | 65             | 3368                  | 265 (8%)                 |
|                                                  | female                     | 42             | 2024                  | 123 (6%)                 |
|                                                  | unclear                    | 3              | 159                   | 4 (3%)                   |
| Affiliation                                      | university                 | 88             | 4402                  | 258 (6%)                 |
|                                                  | government                 | 9              | 410                   | 22 (5%)                  |
|                                                  | industry / other           | 13             | 739                   | 112 (15%)                |
| Country                                          | Europe                     | 62             | 3903                  | 324 (8%)                 |
|                                                  | North-America              | 19             | 688                   | 38 (6%)                  |
|                                                  | Asia                       | 21             | 484                   | 9 (2%)                   |
|                                                  | Australia / New Zealand    | 8              | 476                   | 21 (4%)                  |
| <b>Total</b>                                     |                            | <b>110</b>     | <b>5551</b>           | <b>392 (7%)</b>          |

**Table 2. Odds ratios (95% CIs) for the chance of being cited, all types of publications included, N = 110, n = 5551 )**

| <b>Publication characteristics,</b>                |                  |                      |                        |
|----------------------------------------------------|------------------|----------------------|------------------------|
| <b>content-related</b>                             | <b>Crude OR</b>  | <b>Adjusted OR *</b> | <b>R<sup>2</sup> *</b> |
| Type of Exposure (ref: both Siblings & Infections) |                  |                      | 0.10                   |
| only Number of Siblings                            | 0.8 (0.6 – 1.1)  | 0.5 (0.4 – 0.7)      |                        |
| only Infection History                             | 1.3 (0.97–1.6)   | 0.8 (0.6 – 1.1)      |                        |
| Study Outcome (ref: non-supportive results)        |                  |                      | 0.11                   |
| mixed / unclear results                            | 1.2 (0.9 – 1.7)  | 3.1 (2.2 – 4.5)      |                        |
| supportive results                                 | 1.5 (1.1 – 2.0)  | 2.2 (1.6 – 3.1)      |                        |
| <b>Publication characteristics,</b>                |                  |                      |                        |
| <b>other content-related</b>                       | <b>Crude OR</b>  | <b>Adjusted OR *</b> | <b>R<sup>2</sup> *</b> |
| Publication Type (empirical vs synthesis)          | 4.3 (3.2 – 5.7)  |                      | 0.04 (crude)           |
| Study Design (ref: cross-sectional)                |                  |                      | 0.09 (crude)           |
| case control                                       | 1.4 (0.9 – 2.2)  |                      |                        |
| retrospective cohort                               | 0.9 (0.7 – 1.2)  |                      |                        |
| prospective cohort                                 | 0.3 (0.2 – 0.5)  |                      |                        |
| narrative review                                   | 0.1 (0.0 – 0.1)  |                      |                        |
| systematic review                                  | 3.3 (1.8 – 5.8)  |                      |                        |
| editorial / other                                  | 0.3 (0.2 – 0.4)  |                      |                        |
| Sample Size (ref: low, n = 3517)                   |                  |                      | 0.02                   |
| medium                                             | 1.6 (1.2 – 2.3)  | 1.6 (1.0 – 2.6)      |                        |
| high                                               | 1.6 (1.2 – 2.3)  | 1.9 (1.2 – 3.0)      |                        |
| Specificity (ref: low)                             |                  |                      | 0.11                   |
| medium                                             | 2.5 (1.5 – 4.0)  | 2.7 (1.6 – 4.5)      |                        |
| high                                               | 8.8 (5.8 – 13.5) | 5.0 (3.1 – 7.9)      |                        |

| <b>Publication characteristics,</b>          |                 |                      |                        |
|----------------------------------------------|-----------------|----------------------|------------------------|
| <b>not content-related</b>                   | <b>Crude OR</b> | <b>Adjusted OR *</b> | <b>R<sup>2</sup> *</b> |
| Conclusive Title (yes vs no)                 | 0.4 (0.3 – 0.7) | 0.3 (0.2 – 0.4)      | 0.10                   |
| Funding Source (ref: exclusively non-profit) |                 |                      | 0.09                   |
| profit or both profit/non-profit             | 0.9 (0.6 – 1.2) | 0.8 (0.6 – 1.2)      |                        |
| not reported                                 | 0.4 (0.3 – 0.5) | 0.8 (0.6 – 1.0)      |                        |
| Number of Authors (ref: 1-2)                 |                 |                      | 0.09                   |
| 3 - 5                                        | 1.9 (1.4 – 2.5) | 1.0 (0.7 – 1.5)      |                        |
| >= 6                                         | 3.6 (2.7 – 4.9) | 1.5 (1.0 – 2.4)      |                        |
| Number of Affiliations (ref: 1)              |                 |                      | 0.09                   |
| 2                                            | 2.6 (2.0 – 3.5) | 1.8 (1.3 – 2.5)      |                        |
| >= 3                                         | 2.1 (1.6 – 2.8) | 1.6 (1.1 – 2.2)      |                        |
| Number of References (ref: <30)              |                 |                      | 0.09                   |
| 30 - 50                                      | 1.1 (0.8 – 1.3) | 1.0 (0.8 – 1.2)      |                        |
| >= 50                                        | 0.4 (0.3 – 0.6) | 0.8 (0.5 – 1.3)      |                        |
| <b>Journal characteristics</b>               |                 |                      |                        |
|                                              | <b>Crude OR</b> | <b>Adjusted OR *</b> | <b>R<sup>2</sup> *</b> |
| Journal Impact Factor (ref: 0-2, n = 5033)   |                 |                      | 0.11                   |
| 2 – 4                                        | 3.4 (2.2 – 5.3) | 2.7 (1.7 – 4.2)      |                        |
| >= 4                                         | 6.0 (4.0 – 9.2) | 4.9 (3.2 – 7.6)      |                        |
| <b>Author characteristics</b>                |                 |                      |                        |
|                                              | <b>Crude OR</b> | <b>Adjusted OR *</b> | <b>R<sup>2</sup> *</b> |
| Gender (female vs male, n = 5392)            | 0.8 (0.6 – 1.0) | 0.7 (0.6 – 1.0)      | 0.09                   |
| Region (ref: Europe)                         |                 |                      | 0.11                   |
| North-America                                | 0.9 (0.6 – 1.3) | 0.9 (0.5 – 1.4)      |                        |
| Asia                                         | 0.3 (0.1 – 0.6) | 0.2 (0.1 – 0.4)      |                        |
| Australia / New-Zealand                      | 0.5 (0.3 – 0.8) | 0.5 (0.3 – 0.8)      |                        |
| Type of Affiliation (other vs university)    | 2.3 (1.8 – 2.9) | 2.0 (1.5 – 2.5)      | 0.10                   |
| <b>Citation characteristics</b>              |                 |                      |                        |
|                                              | <b>Crude OR</b> | <b>Adjusted OR *</b> | <b>R<sup>2</sup> *</b> |
| Authority (ref: low)                         |                 |                      | 0.11                   |
| medium                                       | 2.4 (1.8 – 3.3) | 1.8 (1.3 – 2.5)      |                        |
| high                                         | 3.7 (2.8 – 4.8) | 2.7 (2.0 – 3.7)      |                        |

\* adjusted for study design. **supportive:** supportive for Strachan's original hygiene hypothesis, i.e. inverse association between siblings/infections and allergy. **non-supportive:** no association or positive association between siblings/infections and allergy. **N:** number of publications. **n:** number of potential citation paths.

**Table 3. Concordance odds ratios (95% CI's) for the chance of being cited, all types of articles included, N = 110, n = 5551)**

| <b>Content-related</b>                       | <b>Crude OR</b> | <b>Adjusted OR *</b> | <b>R<sup>2</sup> *</b> |
|----------------------------------------------|-----------------|----------------------|------------------------|
| Type of Exposure (conc. vs. not)             | 10 (5.6 – 18)   | 13 (7.1 – 23)        | 0.14                   |
| Study Outcome (conc. vs. not, n = 1799)**    | 2.9 (1.4 – 6.0) | 3.4 (1.6 – 7.1)      | 0.06                   |
| <b>Not content-related</b>                   | <b>Crude OR</b> | <b>Adjusted OR *</b> | <b>R<sup>2</sup> *</b> |
| Article Type (conc. vs. not)                 | 1.1 (0.9 – 1.3) |                      | 0.00 (crude)           |
| Funding Source (conc. vs. not, n = 1475)***  | 1.3 (0.8 – 1.9) | 1.2 (0.8 – 1.8)      | 0.05                   |
| Publisher (conc. vs. not, n = 4971)****      | 0.9 (0.7 – 1.2) | 0.9 (0.7 – 1.2)      | 0.08                   |
| Author Affiliation (conc. vs. not)           | 0.7 (0.6 – 0.9) | 0.8 (0.7 – 1.0)      | 0.08                   |
| Author Gender (conc. vs. not, n = 5254)***** | 1.0 (0.8 – 1.3) | 1.0 (0.8 – 1.3)      | 0.08                   |
| Author Region (conc. vs. not)                | 1.9 (1.6 – 2.4) | 2.0 (1.6 – 2.5)      | 0.09                   |
| Self-citation (yes vs no)                    | 6.1 (3.8 – 9.7) | 6.1 (3.7 – 9.9)      | 0.09                   |

\* adjusted for study design of cited publication; \*\* publications with mixed results excluded from analysis; \*\*\* publications without reported funding source excluded from analysis; \*\*\*\* Three main publishers are differentiated: Wiley-Blackwell, BMJ, and Elsevier. Either the cited or the citing publication should be in one of these categories to be included in the analysis. \*\*\*\*\* publications with unclear author's gender excluded from analysis; N: number of publication. n: number of potential citation paths.

## Supplement

**Text S1.** Protocol deviations

**Text S2.** Data extraction

**Text S3.** References of included literature on Strachan's hygiene hypothesis

**Table S1.** All characteristics of the publications in the hygiene hypothesis network.

**Table S2.** Top 6 of articles and authors within network.

**Table S3.** Odds ratios for the chance of *empirical* publications to be cited within full network.

**Table S4.** Odds ratios for the chance of *empirical* publications to be cited by *synthesis* publications.

**Table S5.** Sensitivity analyses on odds ratios for the chance of being cited, without the four most cited publications.

**Table S6.** Sensitivity analyses on odds ratios for the chance of being cited, with a 1-year time lag between cited and citing publication.

**Table S7.** Sensitivity analyses on odds ratios for the chance of being cited, without citing publications with less than 10 potential citation paths.



1  
2  
3  
4  
5  
6  
7  
8  
9  
10  
11  
12  
13  
14  
15  
16  
17  
18  
19  
20  
21  
22  
23  
24  
25  
26  
27  
28  
29  
30  
31  
32  
33  
34  
35  
36  
37  
38  
39  
40  
41  
42  
43  
44  
45  
46  
47  
48  
49  
50  
51  
52  
53  
54  
55  
56  
57  
58  
59  
60

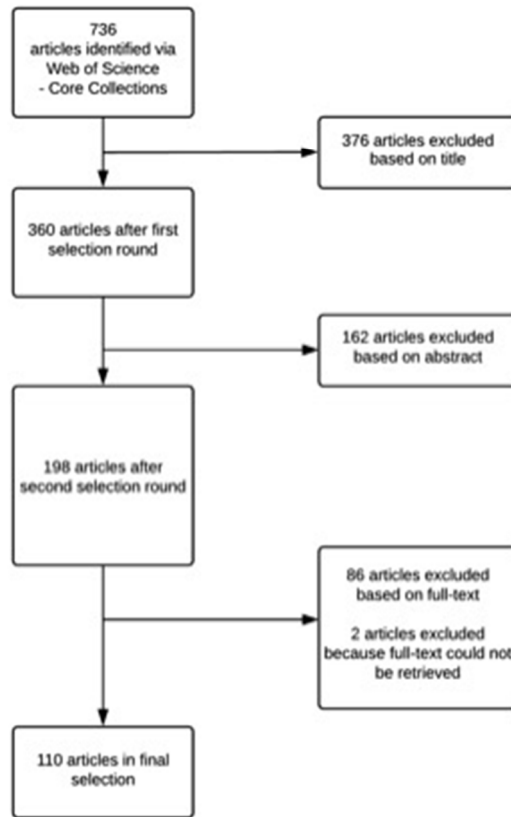

Figure 1. Flow diagram of article selection process.

101x155mm (72 x 72 DPI)

only

1  
2  
3 **Selective citation in the literature on**  
4  
5 **the hygiene hypothesis**  
6  
7  
8  
9

10  
11  
12 **Supplement**  
13  
14  
15  
16  
17  
18

19 **Text S1.** Protocol deviations

20  
21 **Text S2.** Data extraction

22  
23  
24 **Text S3.** References of included literature on Strachan's hygiene hypothesis  
25  
26  
27

28 **Table S1.** All characteristics of the publications in the hygiene hypothesis network.  
29

30 **Table S2.** Top 6 of articles and authors within network.  
31

32 **Table S3.** Odds ratios for the chance of *empirical* publications to be cited within full network.  
33  
34

35 **Table S4.** Odds ratios for the chance of *empirical* publications to be cited by *synthesis*  
36 publications.  
37

38 **Table S5.** Sensitivity analyses on odds ratios for the chance of being cited, without the four  
39 most cited publications.  
40

41  
42 **Table S6.** Sensitivity analyses on odds ratios for the chance of being cited, with a 1-year time  
43 lag between cited and citing publication.  
44

45 **Table S7.** Sensitivity analyses on odds ratios for the chance of being cited, without citing  
46 publications with less than 10 potential citation paths.  
47  
48  
49  
50  
51  
52  
53  
54  
55  
56  
57  
58  
59  
60

### Text S1. Protocol deviations

*Search strategy.* We ran some checks of our original search strategy (with ‘*hygiene hypothesis*’ in combination with the pre-specified health outcomes). These checks indicated that many relevant publications in the period 1990 – 2000 were missed. Going through these missed publications we found out that the name for this hygiene hypothesis was not yet accepted or used. Also, we realised that almost all relevant publications within this network referred to Strachan’s original study from 1989. We decided to change the search strategy, into *all publications referring to Strachan’s original article*. Additionally, we limited the output to those publications that mentioned ‘rhinitis’ or a similar term in the title, abstract or keywords (see inclusion criteria).

*Inclusion criteria* (regarding the health outcome and types of exposure). Originally, all publications with either health outcome *rhinitis* or *asthma* were to be included. This yielded too many publications in our network, hence we decided to include only publications on rhinitis (or hay fever, or rhinoconjunctivitis). Inclusion solely based on asthma would also have yielded a network that was too large. Also, rhinitis is the original outcome as studied by Strachan. Similarly, we included only publications with exposures *number of siblings* and *infection history*. These are the two most important types of exposure related to the hygiene hypothesis as originally stated by Strachan. Number of siblings was originally studied by Strachan, and infections during childhood (or during pregnancy) was his explanation for the relationship between number of siblings and hay fever.

*Types of health outcome.* We intended to score both *asthma* and *rhinitis* as health outcomes. However, as we included only publications that studied the relationship with rhinitis, and excluded publications that were solely on asthma, we decided to focus on rhinitis. Thus, for the

1  
2  
3 empirical publications, we scored the relationships Siblings – Rhinitis and Infections – Rhinitis.  
4  
5 (We also scored asthma, dermatitis and atopic sensitisation, but only for the sensitivity  
6  
7 analyses.) Synthesis publications often did not differentiate between the different allergies in  
8  
9 their general conclusion, so for the synthesis publications we scored statements on Siblings –  
10  
11 Allergy and Infection – Allergy.  
12  
13  
14  
15  
16

17 *Types of exposure.* We focused on two exposures: *number of siblings* (or household size or  
18  
19 sibling order) and *history of infections* (as assessed by parental questionnaire, serology or  
20  
21 medical records). We used this variable also in our analyses; it was scored as a) number of  
22  
23 siblings only, b) only infection history, and c) both number of siblings and infection history.  
24  
25  
26  
27

28 *Study outcome scoring strategy.* There were many empirical publications with contradictory  
29  
30 results, especially in the case of Infections where the results seemed to depend on the type of  
31  
32 infection. In order to deal with this, we decided to use the *authors' conclusion* on Siblings –  
33  
34 Rhinitis and Infections – Rhinitis as leading. We used 5 categories: 0. not measured or reported;  
35  
36 1. effect in line with hygiene hypothesis (inverse relationship); 2. no relationship; 3. effect  
37  
38 contrary to hygiene hypothesis (positive relationship); 4. mixed or unclear results. Synthesis  
39  
40 publications were scored in a similar way, but then on Siblings – Allergy and Infections –  
41  
42 Allergy.  
43  
44  
45  
46

47 If no clear authors' conclusion was stated in the empirical publications, we used the data  
48  
49 that were presented in the tables or the text and scored as follows: 1. statistically significant  
50  
51 inverse relationship; 2. no statistically significant relationship; 3. statistically significant positive  
52  
53 relationship; 4. mixed or unclear results. If both adjusted analyses and crude analyses were  
54  
55 presented we preferred the adjusted ones. There is one exception: adjustment for Infections in  
56  
57  
58  
59  
60

1  
2  
3 the relationship Siblings – Rhinitis; after all, the hygiene hypothesis states that infection is the  
4 mediator between siblings and rhinitis.  
5  
6

7  
8 In the analyses we used one combined measure for study outcome, with three levels: 1)  
9 supportive; 2) mixed results / unclear; 3) non-supportive. Publications were scored as supportive  
10 if the exposure or exposures showed an inverse association with rhinitis. Publications were  
11 scored as non-supportive if there was no association or a positive association of the exposure  
12 with rhinitis. Publications were scored as mixed if the exposure or exposures showed mixed or  
13 unclear results, and if two exposures were investigated, and one showed an inverse association  
14 and the other showed no or a positive association.  
15  
16  
17  
18  
19  
20  
21  
22  
23  
24  
25

26 *General conclusion about the hygiene hypothesis.* While studying the literature on the hygiene  
27 hypothesis we realised that many related hypotheses reside under this name, all evolved from  
28 one another. *The* hygiene hypothesis clearly does not exist. Support for one version of the  
29 hypothesis often implied the refutation of another (older) version. As authors assumed different  
30 versions, their general conclusion on the hygiene hypothesis would not be compatible. We  
31 decided to not score this general conclusion.  
32  
33  
34  
35  
36  
37  
38  
39  
40  
41

42 *Specificity.* We used 3 outcome categories for publication's specificity instead of 5.  
43  
44  
45  
46

47 *Study design.* Ecological studies were excluded from the network. Cohort studies were further  
48 classified as retrospective and prospective cohort studies. This latter step was data-driven  
49 because we realised during the analysis that prospective cohort studies were cited less often.  
50  
51  
52  
53  
54  
55  
56  
57  
58  
59  
60

1  
2  
3 *Publisher.* In addition to the protocol we also scored the publisher of the journal, based on the  
4 information in Journal Citation Reports and in Web of Science. This could be interesting for  
5 publisher self-citation concordance analysis.  
6  
7  
8  
9

10  
11  
12 *Explained variance.* In addition to the original analysis plan in the protocol, we also calculated  
13 the explained variance of the adjusted models, so that these models are easier to compare. For  
14 this purpose we calculated McFadden's  $R^2$  by the following formula:  $R^2 = 1 - LL_M/LL_0$  in  
15 which  $LL_M$  stands for the log likelihood of the current regression model and  $LL_0$  stands for the  
16 log likelihood of the empty random-regression model. Both the current and the empty model  
17 (without predictors) were nested under the citing publication. Because of missing values for  
18 certain determinants (such as sample size), some models could be tested only on a sub-selection  
19 of citation paths. If this was the case, then  $LL_0$  was calculated on the same sub-selection of  
20 citation paths.  
21  
22  
23  
24  
25  
26  
27  
28  
29  
30  
31  
32  
33  
34  
35  
36  
37  
38  
39  
40  
41  
42  
43  
44  
45  
46  
47  
48  
49  
50  
51  
52  
53  
54  
55  
56  
57  
58  
59  
60

## Text S2. Data extraction.

A range of variables were extracted or derived from each included publication: *content-related publication characteristics* (i.e. type of exposure, publication type and study design, sample size, specificity, study outcome), *content-unrelated publication characteristics* (conclusiveness of the title, funding source, number of authors, number of affiliations, number of references), *journal characteristics* (publisher, journal impact factor), *author characteristics* (gender, country, and affiliation of the corresponding author), and *citation characteristics* (within-network authority, self-citation). All characteristics were treated as determinant in the statistical analysis unless stated otherwise.

**Publication characteristics – content-related.** The following variables were in this subcategory: type of exposure, publication type/study design, sample size, specificity, and study outcome. Study outcome is a special content-related characteristic and will be discussed in the next section.

*Type of exposure* refers to the type of exposure that is being studied or reviewed: *only number of siblings, only infection history, or both*.

*Publication type* was classified into empirical publications, generating their own data, and non-empirical publications. Empirical publications were further classified into the following *study designs*: cross-sectional, case-control, retrospective cohort, prospective cohort, and experimental studies. Non-empirical publications were further classified into: narrative reviews, systematic reviews, and other (editorials, leading articles, commentaries).

*Sample size* concerned the number of participants in the publications. Non-empirical publications had no sample size. The sample size of the empirical publications was classified into three equal categories based on tertiles.

The *specificity* of the publications varied. The higher the specificity of a publication, the better this publication would fit in our network. Some publications may deal only with the

1  
2  
3 statement under investigation, others were broader. Farm, autoimmune diseases, endotoxins,  
4  
5 helminths, and animal or mechanistic studies decreased the specificity of a publication, as did  
6  
7 publications on other determinants of rhinitis such as air pollution, and mother smoking status.  
8  
9 Specificity ranged from 1 (very broad) to 3 (highly specific): 1 - hardly about Strachan's  
10  
11 original hygiene hypothesis (associations between siblings / infections – rhinitis); 2 - partly  
12  
13 about Strachan's original hygiene hypothesis; 3 - only about Strachan's original hygiene  
14  
15 hypothesis.  
16  
17  
18

19 **Publication characteristics – study outcome.** Study outcome was scored as follows: 1.  
20  
21 supportive of the hygiene hypothesis; 2. mixed or unclear results; 3. non-supportive of the  
22  
23 hygiene hypothesis. An inverse relationship between past exposure and rhinitis is considered to  
24  
25 be supportive for the hygiene hypothesis, while a neutral or positive relationship was scored as  
26  
27 non-supportive. The scoring was based on the authors' interpretation of the results, as it was  
28  
29 stated in the text of the publication. If the authors' interpretation was unclear, we scored study  
30  
31 outcome based on the direction and statistical significance of the data. Non-empirical  
32  
33 publications seldom distinguished between allergy subtypes, so we used the stated conclusion  
34  
35 on general allergy as outcome measure.  
36  
37  
38

39  
40 Exposure could be either number of siblings (or order of siblings or household size) or  
41  
42 history of bacterial or viral infection (as assessed by parental questionnaire, serology, or medical  
43  
44 records). If the impact of number of both siblings and infection history was assessed and they  
45  
46 were contradicting each other (with one exposure showing inverse association, the other a  
47  
48 neutral or positive association), then study outcome was scored as mixed.  
49

50  
51 **Publication characteristics - not content-related.** The following variables were in this  
52  
53 category: conclusiveness of the title, funding source, number of authors, number of affiliations,  
54  
55 and number of references. Title conclusiveness was coded as yes if a clear outcome was stated  
56  
57 in the title, including the direction of the relationship (e.g. "Inverse relation between infections  
58  
59  
60



1  
2  
3 and allergies”), otherwise as no (e.g. “Infections, rhinitis, and their relationship”). Funding  
4  
5 source was coded as non-profit (e.g. government or university), for-profit, both, or not reported.  
6  
7

8 **Journal characteristics.** The following variables were in this category: publisher and  
9  
10 journal impact factor. Journal impact factor, in the publication year of the potentially cited  
11  
12 publication, was retrieved from the Journal Citation Reports (JCR) database. Journal publisher  
13  
14 was also retrieved from JCR.  
15  
16

17 **Author characteristics.** The following variables were in this category: gender of the  
18  
19 corresponding author (assessed by first name, with help of [www.genderchecker.com](http://www.genderchecker.com); if first  
20  
21 name was not given, other articles of the same author were searched, and the profile of the  
22  
23 author at the university or at [www.researchgate.com](http://www.researchgate.com) was checked), country of the corresponding  
24  
25 author, and affiliation of the corresponding author. Affiliation was classified as government,  
26  
27 university, industry or other.  
28  
29

30 **Citation characteristics.** There were some variables that depend on the cited  
31  
32 publication as well as the citing publication: time to citation, authority, and self-citation.  
33  
34

35 *Time to citation* was the number of years between the publication date of the cited  
36  
37 publication and the submission date of the citing publication. This variable was not used as  
38  
39 determinant of citation, but to determine the dataset of potential citation paths: only citation  
40  
41 paths with a positive value for *time to citation* were included in this dataset.  
42  
43

44 As publication date we used either the online publication date or the paper publication  
45  
46 date, depending on which one was earlier. The average duration from submission to publication  
47  
48 was nine months in this network. For 57 publications the submission date was not stated. In  
49  
50 these cases, it was estimated by subtracting nine months from the publication date.  
51  
52

53 *Within-network authority* was a measure for the authority of the authors of a cited  
54  
55 publication within the network. It was calculated for each author and each year separately, by  
56  
57 counting the number of within-network citations to all publications in which the author had been  
58  
59  
60

1  
2  
3 involved. As the number of citations is likely to increase each year, so does the author's  
4 authority. Because we were interested in the authority at the moment of citation, the authority  
5 value of a cited publication also depends on the publication year of the citing publication. In  
6 case of multiple authors, we used the authority value of the author with the highest authority in  
7 that year.  
8  
9  
10  
11  
12  
13

14 *A self-citation* was defined as a citation between two publications that have at least one  
15 author in common.  
16  
17  
18  
19  
20  
21  
22  
23  
24  
25  
26  
27  
28  
29  
30  
31  
32  
33  
34  
35  
36  
37  
38  
39  
40  
41  
42  
43  
44  
45  
46  
47  
48  
49  
50  
51  
52  
53  
54  
55  
56  
57  
58  
59  
60

**Text S3. References of included literature on Strachan's hygiene hypothesis**

1. Strachan DP. Epidemiology of hay-fever - towards a community diagnosis. *Clin Exp Allergy*. 1995;25(4):296-303.
2. Strachan D. Socioeconomic factors and the development of allergy. *Toxicol Lett*. 1996;86(2-3):199-203.
3. Strachan DP, Taylor EM, Carpenter RG. Family structure, neonatal infection, and hay fever in adolescence. *Arch Dis Child*. 1996;74(5):422-6.
4. Burr ML, Merrett TG, Dunstan FDJ, Maguire MJ. The development of allergy in high-risk children. *Clin Exp Allergy*. 1997;27(11):1247-53.
5. Butland BK, Strachan DP, Lewis S, Bynner J, Butler N, Britton J. Investigation into the increase in hay fever and eczema at age 16 observed between the 1958 and 1970 British birth cohorts. *Br Med J*. 1997;315(7110):717-21.
6. Jarvis D, Chinn S, Luczynska C, Burney P. The association of family size with atopy and atopic disease. *Clin Exp Allergy*. 1997;27(3):240-5.
7. Matricardi PM, Rosmini F, Ferrigno L, Nisini R, Rapicetta M, Chionne P, et al. Cross sectional retrospective study of prevalence of atopy among Italian military students with antibodies against hepatitis A virus. *Br Med J*. 1997;314(7086):999-1003.
8. Rasanen M, Laitinen T, Kaprio J, Koskenvuo M, Laitinen LA. Hay fever, asthma and number of older siblings - a twin study. *Clin Exp Allergy*. 1997;27(5):515-8.
9. Serafini U. Do infections protect against asthma and atopy? *Allergy*. 1997;52(9):955-7.
10. Strachan DP. Allergy and family size: A riddle worth solving. *Clin Exp Allergy*. 1997;27(3):235-6.
11. Bodner C, Godden D, Seaton A, Aberdeen WG. Family size, childhood infections and atopic diseases. *Thorax*. 1998;53(1):28-32.
12. Farooqi IS, Hopkin JM. Early childhood infection and atopic disorder. *Thorax*. 1998;53(11):927-32.
13. Jones NS, Carney AS, Davis A. The prevalence of allergic rhinosinusitis: A review. *J Laryngol Otol*. 1998;112(11):1019-30.
14. Lewis SA, Britton JR. Consistent effects of high socioeconomic status and low birth order, and the modifying effect of maternal smoking on the risk of allergic disease during childhood. *Respir Med*. 1998;92(10):1237-44.

15. Ponsonby AL, Couper D, Dwyer T, Carmichael A. Cross sectional study of the relation between sibling number and asthma, hay fever, and eczema. *Arch Dis Child*. 1998;79(4):328-33.
16. von Mutius E. The influence of birth order on the expression of atopy in families: A gene-environment interaction? *Clin Exp Allergy*. 1998;28(12):1454-6.
17. Palmer LJ, Valinsky IJ, Pikora T, Zubrick SR, Landau LI. Environmental factors and asthma and allergy in schoolchildren from Western Australia. *Eur Resp J*. 1999;14(6):1351-7.
18. Pekkanen J, Remes S, Kajosaari M, Husman T, Soininen L. Infections in early childhood and risk of atopic disease. *Acta Paediatr*. 1999;88(7):710-4.
19. Ponsonby AL, Couper D, Dwyer T, Carmichael A, Kemp A. Relationship between early life respiratory illness, family size over time, and the development of asthma and hay fever: A seven year follow up study. *Thorax*. 1999;54(8):664-9.
20. Strachan DP. Lifestyle and atopy. *Lancet*. 1999;353(9163):1457-8.
21. Xu B, Jarvelin MR, Pekkanen J. Prenatal factors and occurrence of rhinitis and eczema among offspring. *Allergy*. 1999;54(8):829-36.
22. Matricardi PM, Rosmini F, Riondino S, Fortini M, Ferrigno L, Rapicetta M, et al. Exposure to foodborne and orofecal microbes versus airborne viruses in relation to atopy and allergic asthma: Epidemiological study. *Br Med J*. 2000;320(7232):412-7.
23. Paunio M, Heinonen OP, Virtanen M, Leinikki P, Patja A, Peltola H. Measles history and atopic diseases - a population-based cross-sectional study. *JAMA-J Am Med Assoc*. 2000;283(3):343-6.
24. Seaton A, Devereux G. Diet, infection and wheezy illness: Lessons from adults. *Pediatr Allergy Immunol*. 2000;11:37-40.
25. von Mutius E. The environmental predictors of allergic disease. *J Allergy Clin Immunol*. 2000;105(1):9-19.
26. Yilmaz M, Bingol G, Altintas D, Kendirli SG. Correlation between atopic diseases and tuberculin responses. *Allergy*. 2000;55(7):664-7.
27. Doull IJM. Does pregnancy prevent atopy? *Clin Exp Allergy*. 2001;31(9):1335-7.
28. Johnston SL, Openshaw PJM. The protective effect of childhood infections - the next challenge is to mimic safely this protection against allergy and asthma. *Br Med J*. 2001;322(7283):376-7.
29. Martinez FD. The coming-of-age of the hygiene hypothesis. *Respir Res*. 2001;2(3):129-32.

- 1
- 2
- 3 30. McKeever TM, Lewis SA, Smith C, Collins J, Heatlie H, Frischer M, et al. Siblings,
- 4 multiple births, and the incidence of allergic disease: A birth cohort study using the West
- 5 Midlands General Practice Research Database. *Thorax*. 2001;56(10):758-62.
- 6
- 7
- 8 31. Ring J, Kramer U, Schafer T, Behrendt H. Why are allergies increasing? *Curr Opin*
- 9 *Immunol*. 2001;13(6):701-8.
- 10
- 11 32. von Mutius E. Infection: Friend or foe in the development of atopy and asthma? The
- 12 epidemiological evidence. *Eur Resp J*. 2001;18(5):872-81.
- 13
- 14 33. Crane J. Asthma and allergic diseases: Is there a downside to cleanliness and can we
- 15 exploit it? *Eur J Clin Nutr*. 2002;56:S39-S43.
- 16
- 17 34. Karmaus W, Botezan C. Does a higher number of siblings protect against the
- 18 development of allergy and asthma? A review. *J Epidemiol Community Health*.
- 19 2002;56(3):209-17.
- 20
- 21
- 22 35. Matricardi PM, Rosmini F, Panetta V, Ferrigno L, Bonini S. Hay fever and asthma in
- 23 relation to markers of infection in the United States. *J Allergy Clin Immunol*. 2002;110(3):381-
- 24 7.
- 25
- 26 36. McKeever TM, Lewis SA, Smith C, Collins J, Heatlie H, Frischer M, et al. Early
- 27 exposure to infections and antibiotics and the incidence of allergic disease: A birth cohort study
- 28 with the West Midlands General Practice Research Database. *J Allergy Clin Immunol*.
- 29 2002;109(1):43-50.
- 30
- 31
- 32 37. McKeever TM, Lewis SA, Smith C, Hubbard R. The importance of prenatal exposures
- 33 on the development of allergic disease - a birth cohort study using the West Midlands General
- 34 Practice Database. *Am J Respir Crit Care Med*. 2002;166(6):827-32.
- 35
- 36 38. Svanes C, Jarvis D, Chinn S, Omenaas E, Gulsvik A, Burney P, et al. Early exposure to
- 37 children in family and day care as related to adult asthma and hay fever: Results from the
- 38 European Community Respiratory Health Survey. *Thorax*. 2002;57(11):945-50.
- 39
- 40 39. Cremonini F, Gasbarrini A. Atopy, *Helicobacter pylori* and the hygiene hypothesis. *Eur J*
- 41 *Gastroenterol Hepatol*. 2003;15(6):635-6.
- 42
- 43 40. McCune A, Lane A, Murray L, Harvey I, Nair P, Donovan J, et al. Reduced risk of
- 44 atopic disorders in adults with *Helicobacter pylori* infection. *Eur J Gastroenterol Hepatol*.
- 45 2003;15(6):637-40.
- 46
- 47 41. Prescott SL. Allergy: The price we pay for cleaner living? *Ann Allergy Asthma*
- 48 *Immunol*. 2003;90(6):64-70.
- 49
- 50 42. Gustafsson D, Andersson K. Effect of indoor environmental factors on development of
- 51 atopic symptoms in children followed up to 4 years of age. *Paediatr Perinat Epidemiol*.
- 52 2004;18(1):17-25.
- 53
- 54 43. Jones N. Allergic rhinitis: Aetiology, predisposing and risk factors. *Rhinology*.
- 55 2004;42(2):49-56.
- 56
- 57
- 58
- 59
- 60

- 1  
2  
3  
4 44. Resch A, Schlipkoter U, Crispin A, Behrendt H, Heinrich J, Wichmann HE, et al. Atopic  
5 disease and its determinants - a focus on the potential role of childhood infection. *Clin Exp*  
6 *Allergy*. 2004;34(8):1184-91.  
7
- 8  
9 45. von Hertzen LC, Haahtela T. Asthma and atopy - the price of affluence? *Allergy*.  
10 2004;59(2):124-37.  
11
- 12 46. Borchers AT, Keen CL, Gershwin ME. Hope for the hygiene hypothesis: When the dirt  
13 hits the fan. *J Asthma*. 2005;42(4):225-47.  
14
- 15 47. Bresciani M, Parisi C, Manghi G, Bonini S. The hygiene hypothesis: Does it function  
16 worldwide? *Curr Opin Allergy Clin Immunol*. 2005;5(2):147-51.  
17
- 18 48. Bufford JD, Gem JE. The hygiene hypothesis revisited. *Immunol Allerg Clin North Am*.  
19 2005;25(2):247-+.  
20
- 21 49. de Meer G, Janssen NAH, Brunekreef B. Early childhood environment related to  
22 microbial exposure and the occurrence of atopic disease at school age. *Allergy*. 2005;60(5):619-  
23 25.  
24
- 25 50. Karmaus W, Johnson CC. Invited commentary: Sibship effects and a call for a  
26 comparative disease approach. *Am J Epidemiol*. 2005;162(2):133-8.  
27
- 28 51. Kopp MV, Semmler S, Horst G, Berner R, Forster J. Hospital admission with neonatal  
29 sepsis and development of atopic disease: Is there a link? *Pediatr Allergy Immunol*.  
30 2005;16(8):630-6.  
31
- 32 52. Nafstad P, Brunekreef B, Skrondal A, Nystad W. Early respiratory infections, asthma,  
33 and allergy: 10-year follow-up of the Oslo Birth Cohort. *Pediatrics*. 2005;116(2):E255-E62.  
34
- 35 53. Westergaard T, Rostgaard K, Wohlfahrt J, Andersen PK, Aaby P, Melbye M. Sibship  
36 characteristics and risk of allergic rhinitis and asthma. *Am J Epidemiol*. 2005;162(2):125-32.  
37
- 38 54. Arbes SJ, Sever ML, Vaughn B, Cohen EA, Zeldin DC. Oral pathogens and allergic  
39 disease: Results from the third national health and nutrition examination survey. *J Allergy Clin*  
40 *Immunol*. 2006;118(5):1169-75.  
41
- 42 55. Balemans WAF, Rovers MM, Schilder AGM, Sanders EAM, Kimpen JLL, Zielhuis GA,  
43 et al. Recurrent childhood upper respiratory tract infections do not reduce the risk of adult atopic  
44 disease. *Clin Exp Allergy*. 2006;36(2):198-203.  
45
- 46 56. Bernsen RMD, van der Wouden JC, Nagelkerke NJD, de Jongste JC. Early life  
47 circumstances and atopic disorders in childhood. *Clin Exp Allergy*. 2006;36(7):858-65.  
48
- 49 57. Biagini JM, LeMasters GK, Ryan PH, Levin L, Reponen T, Bernstein DI, et al.  
50 Environmental risk factors of rhinitis in early infancy. *Pediatr Allergy Immunol*.  
51 2006;17(4):278-84.  
52  
53  
54  
55  
56  
57  
58  
59  
60

- 1  
2  
3 58. Friedrich N, Volzke H, Schwahn C, Kramer A, Junger M, Schafer T, et al. Inverse  
4 association between periodontitis and respiratory allergies. *Clin Exp Allergy*. 2006;36(4):495-  
5 502.  
6  
7  
8 59. Kinra S, Smith GD, Jeffreys M, Gunnell D, Galobardes B, McCarron P. Association  
9 between sibship size and allergic diseases in the Glasgow Alumni Study. *Thorax*.  
10 2006;61(1):48-53.  
11  
12 60. Kocabas E, Yapicioglu H, Yildizdas D, Kendirli SG, Burgut R. The prevalence of atopy  
13 in children with antibodies against hepatitis A virus and hepatitis B virus. *Turk J Pediatr*.  
14 2006;48(3):189-96.  
15  
16  
17 61. Paunio M, Peltola H, Virtanen M, Leinikki P, Makela A, Heinonen OP. Acute infections,  
18 infection pressure, and atopy. *Clin Exp Allergy*. 2006;36(5):634-9.  
19  
20  
21 62. Zutavern A, von Klot S, Gehring U, Krauss-Etschmann S, Heinrich J. Pre-natal and post-  
22 natal exposure to respiratory infection and atopic diseases development: A historical cohort  
23 study. *Respir Res*. 2006;7:8.  
24  
25  
26 63. Cakir M, Karakas T, Orhan F, Okten A, Gedik Y. Atopy in children with chronic  
27 hepatitis B virus infection. *Acta Paediatr*. 2007;96(9):1343-6.  
28  
29  
30 64. Cetinkaya F, Uslu HS, Nuhoglu A. Effect of neonatal sepsis on the development of  
31 allergies and asthma in later childhood. *Int Arch Allergy Immunol*. 2007;142(2):145-50.  
32  
33  
34 65. Dunder T, Tapiainen T, Pokka T, Uhari M. Infections in child day care centers and later  
35 development of asthma, allergic rhinitis, and atopic dermatitis - prospective follow-up survey 12  
36 years after controlled randomized hygiene intervention. *Arch Pediatr Adolesc Med*.  
37 2007;161(10):972-7.  
38  
39  
40 66. Harris JM, Mills P, White C, Moffat S, Taylor AJN, Cullinan P. Recorded infections and  
41 antibiotics in early life: Associations with allergy in UK children and their parents. *Thorax*.  
42 2007;62(7):631-7.  
43  
44  
45 67. von Mutius E. Allergies, infections and the hygiene hypothesis - the epidemiological  
46 evidence. *Immunobiology*. 2007;212(6):433-9.  
47  
48  
49 68. Baccioglu A, Kalpaklioglu F, Guliter S, Yakaryilmaz F. *Helicobacter pylori* in allergic  
50 inflammation - fact or fiction? *Allergol Immunopath*. 2008;36(2):85-9.  
51  
52  
53 69. Blaser MJ, Chen Y, Reibman J. Does *Helicobacter pylori* protect against asthma and  
54 allergy? *Gut*. 2008;57(5):561-7.  
55  
56  
57 70. Bremner SA, Carey IM, DeWilde S, Richards N, Maier WC, Hilton SR, et al. Infections  
58 presenting for clinical care in early life and later risk of hay fever in two UK birth cohorts.  
59 *Allergy*. 2008;63(3):274-83.  
60  
61  
62 71. Chen Y, Blaser MJ. *Helicobacter pylori* colonization is inversely associated with  
63 childhood asthma. *J Infect Dis*. 2008;198(4):553-60.

- 1  
2  
3 72. Perzanowski MS, Canfield SM, Chew GL, Mellins RB, Hoepner LA, Jacobson JS, et al.  
4 Birth order, atopy, and symptoms of allergy and asthma among inner-city children attending  
5 head start in New York City. *Clin Exp Allergy*. 2008;38(6):968-76.  
6  
7  
8 73. Ponsonby AL, Kemp A. Investigation of the hygiene hypothesis: Current issues and  
9 future directions. *Allergy*. 2008;63(5):506-8.  
10  
11 74. Svanes C. What has the ecchs told us about the childhood risks of asthma, allergy and  
12 lung function? *Clin Respir J*. 2008;2:34-44.  
13  
14 75. Tanaka K, Miyake Y, Arakawa M, Sasaki S, Ohya Y. Dental caries and allergic  
15 disorders in Japanese children: The Ryukyus Child Health Study. *J Asthma*. 2008;45(9):795-9.  
16  
17 76. Torres-Borrogo J, Molina-Teran AB, Montes-Mendoza C. Prevalence and associated  
18 factors of allergic rhinitis and atopic dermatitis in children. *Allergol Immunopath*.  
19 2008;36(2):90-100.  
20  
21 77. Vargas C, Bustos P, Diaz PV, Amigo H, Rona RJ. Childhood environment and atopic  
22 conditions, with emphasis on asthma in a chilean agricultural area. *J Asthma*. 2008;45(1):73-8.  
23  
24 78. Eifan AO, Akkoc T, Ozdemir C, Bahceciler NN, Barlan IB. No association between  
25 tuberculin skin test and atopy in a bacillus Calmette-Guerin vaccinated birth cohort. *Pediatr*  
26 *Allergy Immunol*. 2009;20(6):545-50.  
27  
28 79. Gangal SV, Chowgule R. Infections in early life and susceptibility to allergic diseases:  
29 Relevance of hygiene hypothesis. *Curr Sci*. 2009;96(6):784-93.  
30  
31 80. Kendirli SG, Yilmaz M, Bayram I, Altintas DU, Inal A, Karakoc G. Potential association  
32 between allergic diseases and pertussis infection in schoolchildren: Results of two cross-  
33 sectional studies seven years apart. *Allergol Immunopath*. 2009;37(1):21-5.  
34  
35 81. Kramer MS, Matush L, Bogdanovich N, Dahhou M, Platt RW, Mazer B. The low  
36 prevalence of allergic disease in Eastern Europe. *Clin Exp Allergy*. 2009;39(5):708-16.  
37  
38 82. Matheson MC, Walters EH, Simpson JA, Wharton CL, Ponsonby AL, Johns DP, et al.  
39 Relevance of the hygiene hypothesis to early vs. late onset allergic rhinitis. *Clin Exp Allergy*.  
40 2009;39(3):370-8.  
41  
42 83. Ohfuji S, Miyake Y, Arakawa M, Tanaka K, Sasaki S. Sibship size and prevalence of  
43 allergic disorders in Japan: The Ryukyus Child Health Study. *Pediatr Allergy Immunol*.  
44 2009;20(4):377-84.  
45  
46 84. Bunyavanich S, Soto-Quiros ME, Avila L, Laskey D, Senter JM, Celedon JC. Risk  
47 factors for allergic rhinitis in Costa Rican children with asthma. *Allergy*. 2010;65(2):256-63.  
48  
49 85. Codispoti CD, Levin L, LeMasters GK, Ryan P, Reponen T, Villareal M, et al. Breast-  
50 feeding, aeroallergen sensitization, and environmental exposures during infancy are  
51 determinants of childhood allergic rhinitis. *J Allergy Clin Immunol*. 2010;125(5):1054-60.  
52  
53  
54  
55  
56  
57  
58  
59  
60



- 1  
2  
3 86. Arbes SJ, Matsui EC. Can oral pathogens influence allergic disease? *J Allergy Clin Immunol.* 2011;127(5):1119-27.  
4  
5  
6  
7 87. Liew WK, Lim CWT, Tan TH, Wong KY, Tai BC, Quek SC, et al. The effect of  
8 Kawasaki disease on childhood allergies - a sibling control study. *Pediatr Allergy Immunol.*  
9 2011;22(5):488-93.  
10  
11 88. Matheson MC, Dharmage SC, Abramson MJ, Walters EH, Sunyer J, de Marco R, et al.  
12 Early-life risk factors and incidence of rhinitis: Results from the European community  
13 respiratory health study-an international population-based cohort study. *J Allergy Clin Immunol.*  
14 2011;128(4):816-+.  
15  
16  
17 89. Flohr C, Nagel G, Weinmayr G, Kleiner A, Williams HC, Ait-Khaled N, et al.  
18 Tuberculosis, bacillus Calmette-Guerin vaccination, and allergic disease: Findings from the  
19 International Study of Asthma and Allergies in Childhood Phase Two. *Pediatr Allergy Immunol.*  
20 2012;23(4):324-31.  
21  
22  
23 90. Lee SY, Kwon JW, Seo JH, Song YH, Kim BJ, Yu J, et al. Prevalence of atopy and  
24 allergic diseases in Korean children: Associations with a farming environment and rural  
25 lifestyle. *Int Arch Allergy Immunol.* 2012;158(2):168-74.  
26  
27  
28 91. Lighter-Fisher J, Peng CH. Infection with mycobacterium tuberculosis is inversely  
29 associated with childhood asthma. *Pediatr Allergy Immunol Pulmonol.* 2012;25(2):80-5.  
30  
31 92. Nagel G, Weinmayr G, Flohr C, Kleiner A, Strachan DP, Grp IPTS. Association of  
32 pertussis and measles infections and immunizations with asthma and allergic sensitization in  
33 ISAAC Phase Two. *Pediatr Allergy Immunol.* 2012;23(8):737-46.  
34  
35  
36 93. Schmitz R, Atzpodien K, Schlaud M. Prevalence and risk factors of atopic diseases in  
37 German children and adolescents - a nationwide health report. *Pediatr Allergy Immunol.*  
38 2012;23(8):716-23.  
39  
40 94. Silverberg JI, Kleiman E, Silverberg NB, Durkin HG, Joks R, Smith-Norowitz TA.  
41 Chickenpox in childhood is associated with decreased atopic disorders, IgE, allergic  
42 sensitization, and leukocyte subsets. *Pediatr Allergy Immunol.* 2012;23(1):50-8.  
43  
44  
45 95. Duksal F, Akcay A, Becerir T, Ergin A, Becerir C, Guler N. Rising trend of allergic  
46 rhinitis prevalence among Turkish schoolchildren. *Int J Pediatr Otorhinolaryngol.*  
47 2013;77(9):1434-9.  
48  
49 96. Kondrashova A, Seiskari T, Ilonen J, Knip M, Hyoty H. The 'hygiene hypothesis' and the  
50 sharp gradient in the incidence of autoimmune and allergic diseases between Russian Karelia  
51 and Finland. *Apmis.* 2013;121(6):478-93.  
52  
53  
54 97. Kuo HC, Chang WC, Yang KD, Yu HR, Wang CL, Ho SC, et al. Kawasaki disease and  
55 subsequent risk of allergic diseases: A population-based matched cohort study. *BMC Pediatr.*  
56 2013;13:6.  
57  
58  
59  
60

- 1  
2  
3 98. Prokopakis E, Vardouniotis A, Kawauchi H, Scadding G, Georgalas C, Hellings P, et al.  
4 The pathophysiology of the hygiene hypothesis. *Int J Pediatr Otorhinolaryngol*.  
5 2013;77(7):1065-71.  
6  
7  
8 99. Lionetti E, Leonardi S, Lanzafame A, Garozzo MT, Filippelli M, Tomarchio S, et al.  
9 *Helicobacter pylori* infection and atopic diseases: Is there a relationship? A systematic review  
10 and meta-analysis. *World J Gastroenterol*. 2014;20(46):17635-47.  
11  
12 100. Tantilipikorn P. The relationship between allergic rhinitis and viral infections. *Curr Opin*  
13 *Otolaryngol Head Neck Surg*. 2014;22(3):249-52.  
14  
15 101. Kimura H, Konno S, Isada A, Maeda Y, Musashi M, Nishimura M. Contrasting  
16 associations of body mass index and measles with asthma and rhinitis in young adults. *Allergy*  
17 *Asthma Proc*. 2015;36(4):293-9.  
18  
19 102. Lin CH, Lin WC, Wang YC, Lin IC, Kao CH. Association between neonatal urinary  
20 tract infection and risk of childhood allergic rhinitis. *Medicine (Baltimore)*. 2015;94(38):6.  
21  
22 103. Strachan DP, Ait-Khaled N, Foliaki S, Mallol J, Odhiambo J, Pearce N, et al. Siblings,  
23 asthma, rhinoconjunctivitis and eczema: A worldwide perspective from the international study  
24 of asthma and allergies in childhood. *Clin Exp Allergy*. 2015;45(1):126-36.  
25  
26 104. Han CS. A specific hygiene hypothesis. *Med Hypotheses*. 2016;93:146-9.  
27  
28 105. Indinnimeo L, Porta D, Forastiere F, De Vittori V, De Castro G, Zicari AM, et al.  
29 Prevalence and risk factors for atopic disease in a population of preschool children in Rome:  
30 Challenges to early intervention. *Int J Immunopathol Pharmacol*. 2016;29(2):308-19.  
31  
32 106. Sastra S, Irsa L, Loebis MS, Evalina R. Number of siblings and allergic rhinitis in  
33 children. *Paediatr Indones*. 2016;56(1):1-7.  
34  
35 107. Christiansen ES, Kjaer HF, Eller E, Bindslev-Jensen C, Host A, Mortz CG, et al. Early  
36 childhood risk factors for rhinoconjunctivitis in adolescence: A prospective birth cohort study.  
37 *Clin Transl Allergy*. 2017;7:7.  
38  
39 108. Miftahussurur M, Nusi IA, Graham DY, Yamaoka Y. *Helicobacter*, hygiene, atopy, and  
40 asthma. *Front Microbiol*. 2017;8:11.  
41  
42 109. Wander K, Shell-Duncan B, Brindle E, O'Connor K. Hay fever, asthma, and eczema and  
43 early infectious diseases among children in Kilimanjaro, Tanzania. *Am J Hum Biol*.  
44 2017;29(3):13.  
45  
46 110. Yildizdas HY, Ozcan A, Sertdemir Y, Yilmaz M. Effect of healthcare associated  
47 infections and broad spectrum antibiotic use in newborn period on development of asthma,  
48 allergic rhinitis and atopic dermatitis in early childhood. *Cukurova Med J*. 2017;42(1):132-9.  
49  
50  
51  
52  
53  
54  
55  
56  
57  
58  
59  
60

**Table S1. All characteristics of the publications in the hygiene hypothesis network.**

|                                                          |                            | <b>N publications</b> | <b>n potential citations</b> | <b>n realised citations (%)</b> |
|----------------------------------------------------------|----------------------------|-----------------------|------------------------------|---------------------------------|
| <b>Total</b>                                             |                            | 110                   | 5551                         | 392 (7%)                        |
| <b>Publication characteristics - content-related</b>     | <b>category</b>            | <b>N publications</b> | <b>n potential citations</b> | <b>n realised citations (%)</b> |
| Type of Exposure                                         | only Number of Siblings    | 28                    | 1512                         | 100 (7%)                        |
|                                                          | only Infection History     | 48                    | 1946                         | 144 (7%)                        |
|                                                          | both Siblings & Infections | 34                    | 2093                         | 148 (7%)                        |
| Study Outcome                                            | supportive                 | 41                    | 2322                         | 198 (9%)                        |
| Exposure - Rhinitis                                      | mixed results              | 35                    | 1913                         | 129 (7%)                        |
|                                                          | non-supportive             | 34                    | 1316                         | 65 (5%)                         |
| Publication Type / Study Design                          | Empirical                  | 73                    | 3517                         | 337 (10%)                       |
|                                                          | cross-sectional            | 39                    | 1697                         | 179 (11%)                       |
|                                                          | case-control               | 4                     | 249                          | 36 (14%)                        |
|                                                          | cohort                     | 29                    | 1535                         | 121 (8%)                        |
|                                                          | -retrospective             | 15                    | 817                          | 89 (11%)                        |
|                                                          | -prospective               | 14                    | 718                          | 32 (4%)                         |
|                                                          | intervention               | 1                     | 36                           | 1 (3%)                          |
|                                                          | Synthesis                  | 37                    | 2034                         | 55 (3%)                         |
|                                                          | narrative review           | 27                    | 1423                         | 16 (1%)                         |
|                                                          | systematic review          | 2                     | 80                           | 20 (25%)                        |
|                                                          | -with meta-analysis        | 1                     | 8                            | 1 (13%)                         |
|                                                          | editorial, etc             | 8                     | 531                          | 19 (4%)                         |
| Sample Size                                              | low (1 – 999)              | 24                    | 909                          | 56 (6%)                         |
| (cat; for empirical publications)                        | medium (1000 – 7999)       | 25                    | 1327                         | 143 (11%)                       |
|                                                          | high (>= 8000)             | 24                    | 1281                         | 138 (11%)                       |
| Specificity                                              | 0 (non-specific)           | 27                    | 1402                         | 25 (2%)                         |
|                                                          | 1                          | 39                    | 1657                         | 65 (4%)                         |
|                                                          | 2 (specific)               | 44                    | 2492                         | 302 (12%)                       |
| <b>Publication characteristics - not content-related</b> | <b>category</b>            | <b>N publications</b> | <b>n potential citations</b> | <b>n realised citations (%)</b> |
| Conclusive Title                                         | not conclusive             | 99                    | 5026                         | 375 (7%)                        |
|                                                          | conclusive                 | 11                    | 525                          | 17 (3%)                         |

|                        |                        |    |      |           |
|------------------------|------------------------|----|------|-----------|
| Funding Source         | non-profit             | 44 | 2188 | 214 (10%) |
|                        | for-profit             | 1  | 38   | 1 (3%)    |
|                        | both                   | 12 | 559  | 51 (9%)   |
|                        | not reported / unclear | 53 | 2766 | 126 (5%)  |
| Number of Authors      | 1 - 2                  | 32 | 2017 | 89 (4%)   |
|                        | 3 - 5                  | 41 | 2143 | 155 (7%)  |
|                        | >= 6                   | 37 | 1391 | 148 (11%) |
| Number of Affiliations | 1                      | 36 | 2276 | 111 (5%)  |
|                        | 2                      | 24 | 1168 | 108 (9%)  |
|                        | >= 3                   | 50 | 2107 | 173 (8%)  |
| Number of References   | < 30                   | 35 | 2307 | 194 (8%)  |
|                        | 30 – 50                | 49 | 2060 | 159 (8%)  |
|                        | >= 50                  | 26 | 1184 | 39 (3%)   |

| Journal characteristics     | category        | N publications | n potential citations | n realised citations (%) |
|-----------------------------|-----------------|----------------|-----------------------|--------------------------|
| Journal Impact Factor (cat) | 0 - 2           | 28             | 1275                  | 27 (2%)                  |
|                             | 2 - 4           | 41             | 2087                  | 145 (7%)                 |
|                             | >= 4            | 32             | 1671                  | 176 (11%)                |
| Publisher                   | Wiley-Blackwell | 41             | 2107                  | 82 (4%)                  |
|                             | BMJ             | 15             | 1170                  | 213 (18%)                |
|                             | Elsevier        | 18             | 894                   | 43 (5%)                  |
|                             | other           | 36             | 1380                  | 54 (4%)                  |

| <b>Author characteristics</b>   | <b>category</b>         | <b>N publications</b> | <b>n potential citations</b> | <b>n realised citations (%)</b> |
|---------------------------------|-------------------------|-----------------------|------------------------------|---------------------------------|
| Gender                          | male                    | 65                    | 3368                         | 265 (8%)                        |
|                                 | female                  | 42                    | 2024                         | 123 (6%)                        |
|                                 | unclear                 | 3                     | 159                          | 4 (3%)                          |
| Affiliation                     | university              | 88                    | 4402                         | 258 (6%)                        |
|                                 | government              | 9                     | 410                          | 22 (5%)                         |
|                                 | industry / other        | 13                    | 739                          | 112 (15%)                       |
| Country                         | Europe                  | 62                    | 3903                         | 324 (8%)                        |
|                                 | UK                      | 26                    | 1946                         | 165 (8%)                        |
|                                 | Germany                 | 11                    | 594                          | 19 (3%)                         |
|                                 | Finland                 | 8                     | 516                          | 33 (6%)                         |
|                                 | Italy                   | 7                     | 418                          | 85 (20%)                        |
|                                 | North-America           | 19                    | 688                          | 38 (6%)                         |
|                                 | USA                     | 18                    | 662                          | 36 (5%)                         |
|                                 | Asia                    | 21                    | 484                          | 9 (2%)                          |
|                                 | Turkey                  | 9                     | 303                          | 7 (2%)                          |
|                                 | Japan                   | 4                     | 60                           | 0 (0%)                          |
|                                 | Australia / New Zealand | 8                     | 476                          | 21 (4%)                         |
| Australia                       | 7                       | 407                   | 21 (5%)                      |                                 |
| <b>Citation characteristics</b> | <b>category</b>         |                       | <b>n potential citations</b> | <b>n realised citations (%)</b> |
| Authority                       | low (0-2)               |                       | 2279                         | 81 (4%)                         |
|                                 | medium (2-10)           |                       | 1326                         | 108 (8%)                        |
|                                 | high (>= 10)            |                       | 1946                         | 203 (10%)                       |
| Time to Citation (in years)     | 0 – 1                   |                       | 494                          | 38 (8%)                         |
|                                 | 1 – 2                   |                       | 521                          | 56 (11%)                        |
|                                 | 2 – 3                   |                       | 527                          | 50 (9%)                         |
|                                 | 3 – 4                   |                       | 459                          | 33 (7%)                         |
|                                 | 4 – 5                   |                       | 456                          | 40 (9%)                         |
|                                 | 5 – 6                   |                       | 441                          | 35 (8%)                         |
|                                 | 6 – 7                   |                       | 404                          | 28 (7%)                         |
|                                 | 7 – 8                   |                       | 372                          | 22 (6%)                         |
|                                 | => 8                    |                       | 1877                         | 90 (5%)                         |
| Self-citation                   | no                      |                       | 5462                         | 365 (7%)                        |
|                                 | yes                     |                       | 89                           | 27 (30%)                        |

**Table S2. Top 6 of articles (above) and authors (below) within network, based on the number of received citations up to 2017.**

| Article rank | Article's first author | Title                                                                                                                                | Year | Nr. of received citations (% of potential citations) |
|--------------|------------------------|--------------------------------------------------------------------------------------------------------------------------------------|------|------------------------------------------------------|
| 1            | Matricardi             | Cross sectional retrospective study of prevalence of atopy among Italian military students with antibodies against hepatitis A virus | 1997 | 35 (35 %)                                            |
| 2            | Bodner                 | Family size, childhood infections and atopic diseases                                                                                | 1998 | 32 (33 %)                                            |
| 3            | Matricardi             | Exposure to foodborne and orofecal microbes versus airborne viruses in relation to atopy and allergic asthma: epidemiological study  | 2000 | 32 (38 %)                                            |
| 4            | Strachan               | Family structure, neonatal infection, and hay fever in adolescence                                                                   | 1996 | 28 (26 %)                                            |
| 5            | Farooqi                | Early childhood infection and atopic disorder                                                                                        | 1998 | 21 (23 %)                                            |
| 6            | Karmaus                | Does a higher number of siblings protect against the development of allergy and asthma? A review                                     | 2002 | 19 (26 %)                                            |

  

| Author rank | Author        | Affiliation                              | Country        | Nr. of received citations (= authority) |
|-------------|---------------|------------------------------------------|----------------|-----------------------------------------|
| 1           | P. Matricardi | Consiglio Nazionale delle Ricerche, Rome | Italy          | 84                                      |
| 2           | F. Rosmini    | Istituto Superiore di Sanita, Rome       | Italy          | 84                                      |
| 3           | L. Ferrigno   | Istituto Superiore di Sanita, Rome       | Italy          | 84                                      |
| 4           | M. Rapicetta  | Istituto Superiore di Sanita, Rome       | Italy          | 67                                      |
| 5           | D. Strachan   | University of London, London             | United Kingdom | 57                                      |
| 6           | S. Bonini     | Consiglio Nazionale delle Ricerche, Rome | Italy          | 49                                      |

**Table S3. Odds ratios (95% CIs) for the chance of *empirical* publications to be cited within full network (N = 73, n = 3517).**

| <b>Publication characteristics,</b>                |                 |                      |                        |
|----------------------------------------------------|-----------------|----------------------|------------------------|
| <b>content-related</b>                             | <b>Crude OR</b> | <b>Adjusted OR *</b> | <b>R<sup>2</sup> *</b> |
| Type of Exposure (ref: both Siblings & Infections) |                 |                      | 0.04                   |
| only Number of Siblings                            | 0.5 (0.3 – 0.6) | 0.4 (0.3 – 0.5)      |                        |
| only Infection History                             | 1.0 (0.8 – 1.3) | 0.7 (0.5 – 0.9)      |                        |
| Study Outcome (ref: non-supportive results) **     |                 |                      | 0.07                   |
| mixed / unclear results                            | 1.4 (0.9 – 2.3) | 1.1 (0.7 – 1.9)      |                        |
| supportive results                                 | 4.8 (3.2 – 7.0) | 5.1 (3.3 – 7.8)      |                        |
| <b>Publication characteristics,</b>                |                 |                      |                        |
| <b>other content-related</b>                       | <b>Crude OR</b> | <b>Adjusted OR *</b> | <b>R<sup>2</sup> *</b> |
| Study Design (ref: cross-sectional)                |                 |                      | 0.02 (crude)           |
| case control                                       | 1.4 (0.9 – 2.2) |                      |                        |
| retrospective cohort                               | 0.9 (0.7 – 1.2) |                      |                        |
| prospective cohort                                 | 0.3 (0.2 – 0.5) |                      |                        |
| Sample Size (ref: low)                             |                 | ***                  | 0.02                   |
| medium                                             | 1.6 (1.2 – 2.3) | 1.6 (1.0 – 2.6)      |                        |
| high                                               | 1.6 (1.2 – 2.3) | 1.9 (1.2 – 3.0)      |                        |
| Specificity (ref: low)                             |                 |                      | 0.05                   |
| medium                                             | 4.6 (2.6 – 8.2) | 3.5 (1.8 – 6.5)      |                        |
| high                                               | 7.4 (4.5 – 12)  | 6.1 (3.5 – 10)       |                        |
| <b>Publication characteristics,</b>                |                 |                      |                        |
| <b>not content-related</b>                         | <b>Crude OR</b> | <b>Adjusted OR *</b> | <b>R<sup>2</sup> *</b> |
| Conclusive Title (yes vs no)                       | 0.3 (0.2 – 0.6) | 0.3 (0.1 – 0.5)      | 0.03                   |
| Funding Source (ref: exclusively non-profit)       |                 |                      | 0.02                   |
| profit or both profit/non-profit                   | 0.9 (0.6 – 1.2) | 0.8 (0.5 – 1.1)      |                        |
| not reported                                       | 0.8 (0.6 – 1.1) | 0.8 (0.6 – 1.1)      |                        |
| Number of Authors (ref: 1-2)                       |                 |                      | 0.03                   |
| 3 - 5                                              | 1.1 (0.7 – 1.6) | 1.2 (0.7 – 1.8)      |                        |
| >= 6                                               | 1.7 (1.2 – 2.6) | 1.8 (1.1 – 2.9)      |                        |
| Number of Affiliations (ref: 1)                    |                 |                      | 0.03                   |
| 2                                                  | 1.7 (1.2 – 2.4) | 1.8 (1.2 – 2.6)      |                        |
| >= 3                                               | 1.3 (0.9 – 1.7) | 1.6 (1.2 – 2.4)      |                        |
| Number of References (ref: <30)                    |                 |                      | 0.02                   |
| 30 - 50                                            | 0.9 (0.7 – 1.1) | 1.0 (0.7 – 1.2)      |                        |
| >= 50                                              | 0.3 (0.1 – 0.7) | 0.3 (0.1 – 0.8)      |                        |

| <b>Journal characteristics</b>             | <b>Crude OR</b> | <b>Adjusted OR *</b> | <b>R<sup>2</sup> *</b> |
|--------------------------------------------|-----------------|----------------------|------------------------|
| Journal Impact Factor (ref: 0-2, n = 3266) |                 |                      | 0.06                   |
| 2 – 4                                      | 2.8 (1.7 – 4.5) | 2.6 (1.6 – 4.3)      |                        |
| >= 4                                       | 5.9 (3.7 – 9.5) | 6.6 (4.0 – 11)       |                        |
| <b>Author characteristics</b>              | <b>Crude OR</b> | <b>Adjusted OR *</b> | <b>R<sup>2</sup> *</b> |
| Gender (female vs male, n = 3457)          | 0.6 (0.5 – 0.8) | 0.7 (0.5 – 0.9)      | 0.03                   |
| Region (ref: Europe)                       |                 |                      | 0.04                   |
| North-America                              | 0.5 (0.3–0.97)  | 0.6 (0.3 – 1.1)      |                        |
| Asia                                       | 0.2 (0.1 – 0.4) | 0.1 (0.1 – 0.3)      |                        |
| Australia / New-Zealand                    | 0.5 (0.3 – 0.8) | 0.5 (0.3 – 0.9)      |                        |
| Type of Affiliation (other vs university)  | 2.4 (1.9 – 3.2) | 2.2 (1.7 – 2.9)      | 0.04                   |
| <b>Citation characteristics</b>            | <b>Crude OR</b> | <b>Adjusted OR *</b> | <b>R<sup>2</sup> *</b> |
| Authority (ref: low)                       |                 |                      | 0.05                   |
| medium                                     | 2.0 (1.4 – 3.0) | 2.1 (1.4 – 3.0)      |                        |
| high                                       | 3.6 (2.6 – 5.1) | 3.8 (2.7 – 5.5)      |                        |

\* adjusted for study design and log sample size (if possible). \*\* both the 'crude' and adjusted analyses are (additionally) adjusted for type of exposure. \*\*\* only adjusted for study design. **supportive:** supportive for Strachan's original hygiene hypothesis, i.e. inverse association between siblings/infections and allergy. **non-supportive:** no association or positive association between siblings/infections and allergy. N = number of potentially cited publications; n = number of potential citation paths.



**Table S4. Odds ratios (95% CIs) for the chance of *empirical* publications to be cited by *synthesis* publications (N = 73, n = 1097).**

| <b>Publication characteristics,</b>                |                 |                      |                        |
|----------------------------------------------------|-----------------|----------------------|------------------------|
| <b>content-related</b>                             | <b>Crude OR</b> | <b>Adjusted OR *</b> | <b>R<sup>2</sup> *</b> |
| Type of Exposure (ref: both Siblings & Infections) |                 |                      | 0.07                   |
| only Number of Siblings                            | 0.4 (0.2 – 0.7) | 0.3 (0.2 – 0.6)      |                        |
| only Infection History                             | 1.8 (1.1 – 3.0) | 1.3 (0.7 – 2.3)      |                        |
| Study Outcome (ref: non-supportive results) **     |                 |                      | 0.12                   |
| mixed / unclear results                            | 0.5 (0.2 – 1.0) | 0.4 (0.2 – 0.9)      |                        |
| supportive results                                 | 6.0 (3.1 – 12)  | 7.3 (3.5 – 15)       |                        |
| <b>Publication characteristics,</b>                |                 |                      |                        |
| <b>other content-related</b>                       | <b>Crude OR</b> | <b>Adjusted OR *</b> | <b>R<sup>2</sup> *</b> |
| Study Design (ref: cross-sectional)                |                 |                      | 0.04 (crude)           |
| case control                                       | 2.1 (1.1 – 4.2) |                      |                        |
| retrospective cohort                               | 1.0 (0.6 – 1.6) |                      |                        |
| prospective cohort                                 | 0.3 (0.1 – 0.6) |                      |                        |
| Sample Size (ref: low)                             |                 | ***                  | 0.04                   |
| medium                                             | 1.6 (0.9 – 2.8) | 1.9 (0.8 – 4.6)      |                        |
| high                                               | 1.3 (0.7 – 2.3) | 1.9 (0.8 – 4.4)      |                        |
| Specificity (ref: low)                             |                 |                      | 0.06                   |
| medium                                             | 6.9 (2.8 – 17)  | 4.3 (1.6 – 12)       |                        |
| high                                               | 7.6 (3.4 – 17)  | 5.6 (2.3 – 13)       |                        |
| <b>Publication characteristics,</b>                |                 |                      |                        |
| <b>not content-related</b>                         | <b>Crude OR</b> | <b>Adjusted OR *</b> | <b>R<sup>2</sup> *</b> |
| Conclusive Title (yes vs no)                       | 0.4 (0.2 – 0.9) | 0.2 (0.1 – 0.6)      | 0.05                   |
| Funding Source (ref: exclusively non-profit)       |                 |                      | 0.04                   |
| profit or both profit/non-profit                   | 0.7 (0.4 – 1.2) | 0.7 (0.4 – 1.3)      |                        |
| not reported                                       | 0.6 (0.4 – 1.0) | 0.5 (0.3 – 0.9)      |                        |
| Number of Authors (ref: 1-2)                       |                 |                      | 0.06                   |
| 3 - 5                                              | 0.6 (0.3 – 1.1) | 0.6 (0.3 – 1.2)      |                        |
| >= 6                                               | 1.5 (0.8 – 2.8) | 1.5 (0.7 – 3.2)      |                        |
| Number of Affiliations (ref: 1)                    |                 |                      | 0.04                   |
| 2                                                  | 1.3 (0.7 – 2.4) | 1.6 (0.8 – 3.1)      |                        |
| >= 3                                               | 1.2 (0.7 – 2.0) | 2.0 (1.1 – 3.6)      |                        |
| Number of References (ref: <30)                    |                 |                      | 0.04                   |
| 30 - 50                                            | 0.7 (0.5 – 1.1) | 0.8 (0.5 – 1.2)      |                        |
| >= 50                                              | 0.2 (0.04–0.9)  | 0.2 (0.04–1.0)       |                        |

| <b>Journal characteristics</b>             | <b>Crude OR</b> | <b>Adjusted OR *</b> | <b>R<sup>2</sup> *</b> |
|--------------------------------------------|-----------------|----------------------|------------------------|
| Journal Impact Factor (ref: 0-2, n = 1015) |                 |                      | 0.11                   |
| 2 – 4                                      | 2.6 (1.2 – 5.6) | 2.2 (1.0 – 4.9)      |                        |
| >= 4                                       | 8.2 (3.8 – 18)  | 9.2 (4.1 – 21)       |                        |
| <b>Author characteristics</b>              | <b>Crude OR</b> | <b>Adjusted OR *</b> | <b>R<sup>2</sup> *</b> |
| Gender (female vs male, n = 1079)          | 0.5 (0.3 – 0.8) | 0.6 (0.4 – 0.9)      | 0.04                   |
| Region (ref: Europe)                       |                 |                      | 0.07                   |
| North-America                              | 0.7 (0.2 – 2.2) | 0.9 (0.3 – 2.9)      |                        |
| Asia                                       | 0.2 (0.1 – 0.7) | 0.1 (0.02–0.3)       |                        |
| Australia / New-Zealand                    | 0.2 (0.1 – 0.6) | 0.2 (0.9 – 0.7)      |                        |
| Type of Affiliation (other vs university)  | 3.3 (2.2 – 5.1) | 3.1 (2.0 – 4.8)      | 0.07                   |
| <b>Citation characteristics</b>            | <b>Crude OR</b> | <b>Adjusted OR *</b> | <b>R<sup>2</sup> *</b> |
| Authority (ref: low)                       |                 |                      | 0.07                   |
| medium                                     | 2.6 (1.4 – 4.6) | 2.7 (1.4 – 5.1)      |                        |
| high                                       | 4.0 (2.3 – 7.1) | 4.1 (2.2 – 7.6)      |                        |

\* adjusted for study design and log sample size (if possible). \*\* both the 'crude' and adjusted analyses are (additionally) adjusted for type of exposure. \*\*\* only adjusted for study design. **supportive:** supportive for Strachan's original hygiene hypothesis, i.e. inverse association between siblings/infections and allergy. **non-supportive:** no association or positive association between siblings/infections and allergy. N = number of potentially cited (*empirical*) publications; n = number of potential citation paths.

**Table S5. Sensitivity analyses on odds ratios (95% CIs) for the chance of being cited within full network, without the four most cited publications. N = 106, n = 5164).**

| <b>Publication characteristics,</b>                |                 |                      |                        |
|----------------------------------------------------|-----------------|----------------------|------------------------|
| <b>content-related</b>                             | <b>Crude OR</b> | <b>Adjusted OR *</b> | <b>R<sup>2</sup> *</b> |
| Type of Exposure (ref: both Siblings & Infections) |                 |                      | 0.08                   |
| only Number of Siblings                            | 1.4 (1.0 – 1.9) | 0.9 (0.6 – 1.3)      |                        |
| only Infection History                             | 1.0 (0.8 – 1.4) | 1.0 (0.7 – 1.4)      |                        |
| Study Outcome (ref: non-supportive results) **     |                 |                      | 0.08                   |
| mixed / unclear results                            | 0.8 (0.5 – 1.1) | 1.2 (0.8 – 2.0)      |                        |
| supportive results                                 | 1.0 (0.7 – 1.5) | 1.5 (1.0 – 2.2)      |                        |
| <b>Publication characteristics,</b>                |                 |                      |                        |
| <b>other content-related</b>                       | <b>Crude OR</b> | <b>Adjusted OR *</b> | <b>R<sup>2</sup> *</b> |
| Publication Type (empirical vs synthesis)          | 2.9 (2.1 – 3.9) |                      | 0.03 (crude)           |
| Study Design (ref: cross-sectional)                |                 |                      | 0.08 (crude)           |
| case control                                       | 0.3 (0.1 – 0.8) |                      |                        |
| retrospective cohort                               | 1.1 (0.8 – 1.5) |                      |                        |
| prospective cohort                                 | 0.5 (0.3 – 0.8) |                      |                        |
| narrative review                                   | 0.1 (0.1 – 0.2) |                      |                        |
| systematic review                                  | 4.5 (2.5 – 8.0) |                      |                        |
| editorial / other                                  | 0.4 (0.2 – 0.7) |                      |                        |
| Sample Size (ref: low, n = 3130)                   |                 | ***                  | 0.02                   |
| medium                                             | 2.3 (1.4 – 3.7) | 1.6 (0.9 – 2.9)      |                        |
| high                                               | 3.3 (2.1 – 5.3) | 2.5 (1.5 – 4.2)      |                        |
| Specificity (ref: low)                             |                 |                      | 0.09                   |
| medium                                             | 2.4 (1.5 – 3.9) | 3.3 (1.9 – 5.6)      |                        |
| high                                               | 5.6 (3.6 – 8.7) | 3.5 (2.1 – 5.6)      |                        |
| <b>Publication characteristics,</b>                |                 |                      |                        |
| <b>not content-related</b>                         | <b>Crude OR</b> | <b>Adjusted OR *</b> | <b>R<sup>2</sup> *</b> |
| Conclusive Title (yes vs no)                       | 0.6 (0.4 – 1.0) | 0.5 (0.3 – 0.9)      | 0.08                   |
| Funding Source (ref: exclusively non-profit)       |                 |                      | 0.08                   |
| profit or both profit/non-profit                   | 1.4 (1.0 – 2.0) | 1.4 (0.9 – 2.0)      |                        |
| not reported                                       | 0.5 (0.4 – 0.7) | 1.0 (0.7 – 1.4)      |                        |
| Number of Authors (ref: 1-2)                       |                 |                      | 0.08                   |
| 3 - 5                                              | 1.2 (0.9 – 1.7) | 0.7 (0.5 – 1.1)      |                        |
| >= 6                                               | 2.0 (1.4 – 2.8) | 0.9 (0.6 – 1.4)      |                        |
| Number of Affiliations (ref: 1)                    |                 |                      | 0.08                   |
| 2                                                  | 1.8 (1.3 – 2.5) | 1.1 (0.8 – 1.6)      |                        |
| >= 3                                               | 1.0 (0.7 – 1.4) | 0.6 (0.4 – 0.9)      |                        |

|                                            |                 |                      |                        |
|--------------------------------------------|-----------------|----------------------|------------------------|
| Number of References (ref: <30)            |                 |                      | 0.08                   |
| 30 - 50                                    | 0.9 (0.7 – 1.2) | 0.7 (0.6 – 1.0)      |                        |
| >= 50                                      | 0.6 (0.4 – 0.8) | 0.8 (0.5 – 1.3)      |                        |
| <b>Journal characteristics</b>             | <b>Crude OR</b> | <b>Adjusted OR *</b> | <b>R<sup>2</sup> *</b> |
| Journal Impact Factor (ref: 0-2, n = 4752) |                 |                      | 0.09                   |
| 2 – 4                                      | 2.8 (1.8 – 4.3) | 2.5 (1.6 – 3.9)      |                        |
| >= 4                                       | 4.0 (2.6 – 6.1) | 3.5 (2.2 – 5.5)      |                        |
| <b>Author characteristics</b>              | <b>Crude OR</b> | <b>Adjusted OR *</b> | <b>R<sup>2</sup> *</b> |
| Gender (female vs male, n = 5005)          | 1.4 (1.1 – 1.8) | 1.2 (0.9 – 1.6)      | 0.07                   |
| Region (ref: Europe)                       |                 |                      | 0.08                   |
| North-America                              | 1.2 (0.8 – 1.8) | 1.0 (0.6 – 1.6)      |                        |
| Asia                                       | 0.4 (0.2 – 0.8) | 0.4 (0.2 – 0.8)      |                        |
| Australia / New-Zealand                    | 0.8 (0.5 – 1.2) | 0.7 (0.5 – 1.2)      |                        |
| Type of Affiliation (other vs university)  | 1.6 (1.2 – 2.2) | 1.4 (1.1 – 2.0)      | 0.08                   |
| <b>Citation characteristics</b>            | <b>Crude OR</b> | <b>Adjusted OR *</b> | <b>R<sup>2</sup> *</b> |
| Authority (ref: low)                       |                 |                      | 0.08                   |
| medium                                     | 2.1 (1.5 – 2.9) | 1.6 (1.1 – 2.2)      |                        |
| high                                       | 2.2 (1.6 – 3.0) | 1.6 (1.1 – 2.2)      |                        |

In these sensitivity analyses, the four most cited publications shown in Table S2 are excluded as *cited* publications; they are still included as *citing* publications. \* adjusted for study design and log sample size (if possible). \*\* both the 'crude' and adjusted analyses are (additionally) adjusted for type of exposure. \*\*\* only adjusted for study design. **supportive:** supportive for Strachan's original hygiene hypothesis, i.e. inverse association between siblings/infections and allergy. **non-supportive:** no association or positive association between siblings/infections and allergy. N = number of potentially cited publications; n = number of potential citation paths.

**Table S6. Sensitivity analyses on odds ratios (95% CIs) for the chance of being cited within full network, with a 1-year time lag between cited and citing publication. (N = 110, n = 5057).**

| <b>Publication characteristics,</b>                |                 |                      |                        |
|----------------------------------------------------|-----------------|----------------------|------------------------|
| <b>content-related</b>                             | <b>Crude OR</b> | <b>Adjusted OR *</b> | <b>R<sup>2</sup> *</b> |
| Type of Exposure (ref: both Siblings & Infections) |                 |                      | 0.11                   |
| only Number of Siblings                            | 0.7 (0.5 – 1.0) | 0.4 (0.3 – 0.7)      |                        |
| only Infection History                             | 1.2 (1.0 – 1.6) | 0.8 (0.6 – 1.1)      |                        |
| Study Outcome (ref: non-supportive results) **     |                 |                      | 0.12                   |
| mixed / unclear results                            | 1.2 (0.8 – 1.7) | 2.2 (1.4 – 3.5)      |                        |
| supportive results                                 | 1.7 (1.2 – 2.4) | 3.2 (2.2 – 4.6)      |                        |
| <b>Publication characteristics,</b>                |                 |                      |                        |
| <b>other content-related</b>                       | <b>Crude OR</b> | <b>Adjusted OR *</b> | <b>R<sup>2</sup> *</b> |
| Publication Type (empirical vs synthesis)          | 4.4 (3.2 – 6.0) |                      | 0.05 (crude)           |
| Study Design (ref: cross-sectional)                |                 |                      | 0.09 (crude)           |
| case control                                       | 1.4 (0.9 – 2.2) |                      |                        |
| retrospective cohort                               | 0.9 (0.7 – 1.2) |                      |                        |
| prospective cohort                                 | 0.3 (0.2 – 0.5) |                      |                        |
| narrative review                                   | 0.1 (0.0 – 0.1) |                      |                        |
| systematic review                                  | 3.4 (1.9 – 6.2) |                      |                        |
| editorial / other                                  | 0.3 (0.1 – 0.4) |                      |                        |
| Sample Size (ref: low, n = 3199)                   |                 |                      | 0.02                   |
| medium                                             | 1.6 (1.1 – 2.2) | 1.4 (0.8 – 2.4)      |                        |
| high                                               | 1.4 (1.0 – 2.1) | 1.6 (0.9 – 2.6)      |                        |
| Specificity (ref: low)                             |                 |                      | 0.12                   |
| medium                                             | 2.8 (1.6 – 4.7) | 3.1 (1.7 – 5.6)      |                        |
| high                                               | 10.3 (6.4 – 17) | 6.1 (3.6 – 10)       |                        |

| <b>Publication characteristics,</b>          |                 |                      |                        |
|----------------------------------------------|-----------------|----------------------|------------------------|
| <b>not content-related</b>                   | <b>Crude OR</b> | <b>Adjusted OR *</b> | <b>R<sup>2</sup> *</b> |
| Conclusive Title (yes vs no)                 | 0.5 (0.3 – 0.8) | 0.3 (0.2 – 0.5)      | 0.10                   |
| Funding Source (ref: exclusively non-profit) |                 |                      | 0.10                   |
| profit or both profit/non-profit             | 0.8 (0.6 – 1.2) | 0.8 (0.5 – 1.1)      |                        |
| not reported                                 | 0.4 (0.3 – 0.5) | 0.8 (0.6 – 1.1)      |                        |
| Number of Authors (ref: 1-2)                 |                 |                      | 0.10                   |
| 3 - 5                                        | 2.0 (1.5 – 2.8) | 1.1 (0.7 – 1.8)      |                        |
| >= 6                                         | 3.7 (2.7 – 5.0) | 1.7 (1.0 – 2.6)      |                        |
| Number of Affiliations (ref: 1)              |                 |                      | 0.10                   |
| 2                                            | 3.0 (2.2 – 4.1) | 2.1 (1.4 – 3.0)      |                        |
| >= 3                                         | 2.2 (1.7 – 2.9) | 1.7 (1.2 – 2.3)      |                        |
| Number of References (ref: <30)              |                 |                      | 0.09                   |
| 30 - 50                                      | 1.1 (0.9 – 1.4) | 1.0 (0.8 – 1.3)      |                        |
| >= 50                                        | 0.5 (0.3 – 0.7) | 0.7 (0.4 – 1.3)      |                        |
| <b>Journal characteristics</b>               |                 |                      |                        |
|                                              | <b>Crude OR</b> | <b>Adjusted OR *</b> | <b>R<sup>2</sup> *</b> |
| Journal Impact Factor (ref: 0-2, n = 4580)   |                 |                      | 0.12                   |
| 2 – 4                                        | 3.2 (2.0 – 4.9) | 2.5 (1.6 – 4.0)      |                        |
| >= 4                                         | 5.4 (3.5 – 8.4) | 4.5 (2.9 – 7.1)      |                        |
| <b>Author characteristics</b>                |                 |                      |                        |
|                                              | <b>Crude OR</b> | <b>Adjusted OR *</b> | <b>R<sup>2</sup> *</b> |
| Gender (female vs male, n = 4913)            | 0.8 (0.6 – 1.0) | 0.7 (0.6 – 1.0)      | 0.09                   |
| Region (ref: Europe)                         |                 |                      | 0.11                   |
| North-America                                | 1.0 (0.7 – 1.5) | 1.0 (0.6 – 1.8)      |                        |
| Asia                                         | 0.3 (0.2 – 0.7) | 0.2 (0.1 – 0.4)      |                        |
| Australia / New-Zealand                      | 0.5 (0.3 – 0.9) | 0.5 (0.3 – 0.9)      |                        |
| Type of Affiliation (other vs university)    | 2.3 (1.8 – 2.9) | 1.9 (1.5 – 2.5)      | 0.10                   |
| <b>Citation characteristics</b>              |                 |                      |                        |
|                                              | <b>Crude OR</b> | <b>Adjusted OR *</b> | <b>R<sup>2</sup> *</b> |
| Authority (ref: low)                         |                 |                      | 0.11                   |
| medium                                       | 2.8 (1.9 – 3.9) | 1.9 (1.3 – 2.7)      |                        |
| high                                         | 4.0 (2.9 – 5.5) | 2.8 (2.0 – 4.0)      |                        |

\* adjusted for study design. \*\* both the 'crude' and adjusted analyses are (additionally) adjusted for type of exposure. **supportive:** supportive for Strachan's original hygiene hypothesis, i.e. inverse association between siblings/infections and allergy. **non-supportive:** no association or positive association between siblings/infections and allergy. **N:** number of publications. **n:** number of potential citation paths.

**Table S7. Sensitivity analyses on odds ratios (95% CIs) for the chance of being cited, without citing publications with less than 10 potential citation paths (N = 110, n = 5507).**

| <b>Publication characteristics,</b>                |                 |                      |                        |
|----------------------------------------------------|-----------------|----------------------|------------------------|
| <b>content-related</b>                             | <b>Crude OR</b> | <b>Adjusted OR *</b> | <b>R<sup>2</sup> *</b> |
| Type of Exposure (ref: both Siblings & Infections) |                 |                      | 0.10                   |
| only Number of Siblings                            | 0.8 (0.6 – 1.1) | 0.5 (0.4 – 0.7)      |                        |
| only Infection History                             | 1.2 (1.0 – 1.6) | 0.8 (0.6 – 1.1)      |                        |
| Study Outcome (ref: non-supportive results) **     |                 |                      | 0.12                   |
| mixed / unclear results                            | 1.2 (0.8 – 1.7) | 2.3 (1.5 – 3.6)      |                        |
| supportive results                                 | 1.7 (1.3 – 2.4) | 3.0 (2.1 – 4.2)      |                        |
| <b>Publication characteristics,</b>                |                 |                      |                        |
| <b>other content-related</b>                       | <b>Crude OR</b> | <b>Adjusted OR *</b> | <b>R<sup>2</sup> *</b> |
| Publication Type (empirical vs synthesis)          | 4.2 (3.1 – 5.6) |                      | 0.04 (crude)           |
| Study Design (ref: cross-sectional)                |                 |                      | 0.09 (crude)           |
| case control                                       | 1.4 (1.0 – 2.2) |                      |                        |
| retrospective cohort                               | 0.8 (0.6 – 1.1) |                      |                        |
| prospective cohort                                 | 0.4 (0.2 – 0.5) |                      |                        |
| narrative review                                   | 0.1 (0.0 – 0.1) |                      |                        |
| systematic review                                  | 3.3 (1.8 – 5.8) |                      |                        |
| editorial / other                                  | 0.3 (0.2 – 0.4) |                      |                        |
| Sample Size (ref: low, n = 3423)                   |                 |                      | 0.02                   |
| medium                                             | 1.5 (1.1 – 2.1) | 1.5 (0.9 – 2.5)      |                        |
| high                                               | 1.4 (1.0 – 2.0) | 1.7 (1.1 – 2.8)      |                        |
| Specificity (ref: low)                             |                 |                      | 0.11                   |
| medium                                             | 2.2 (1.4 – 3.6) | 2.5 (1.4 – 4.2)      |                        |
| high                                               | 8.6 (5.6 – 13)  | 4.9 (3.1 – 7.9)      |                        |

| <b>Publication characteristics,</b>          |                 |                      |                        |
|----------------------------------------------|-----------------|----------------------|------------------------|
| <b>not content-related</b>                   | <b>Crude OR</b> | <b>Adjusted OR *</b> | <b>R<sup>2</sup> *</b> |
| Conclusive Title (yes vs no)                 | 0.4 (0.3 – 0.7) | 0.3 (0.2 – 0.5)      | 0.10                   |
| Funding Source (ref: exclusively non-profit) |                 |                      | 0.09                   |
| profit or both profit/non-profit             | 0.9 (0.6 – 1.3) | 0.8 (0.6 – 1.2)      |                        |
| not reported                                 | 0.4 (0.3 – 0.5) | 0.7 (0.5 – 1.0)      |                        |
| Number of Authors (ref: 1-2)                 |                 |                      | 0.09                   |
| 3 - 5                                        | 2.0 (1.5 – 2.7) | 1.1 (0.7 – 1.7)      |                        |
| >= 6                                         | 3.8 (2.8 – 5.2) | 1.7 (1.1 – 2.6)      |                        |
| Number of Affiliations (ref: 1)              |                 |                      | 0.09                   |
| 2                                            | 2.8 (2.1 – 3.7) | 1.9 (1.3 – 2.6)      |                        |
| >= 3                                         | 2.2 (1.7 – 2.9) | 1.6 (1.2 – 2.3)      |                        |
| Number of References (ref: <30)              |                 |                      | 0.09                   |
| 30 - 50                                      | 1.0 (0.8 – 1.3) | 0.9 (0.7 – 1.2)      |                        |
| >= 50                                        | 0.4 (0.3 – 0.6) | 0.8 (0.4 – 1.3)      |                        |
| <b>Journal characteristics</b>               |                 |                      |                        |
|                                              | <b>Crude OR</b> | <b>Adjusted OR *</b> | <b>R<sup>2</sup> *</b> |
| Journal Impact Factor (ref: 0-2, n = 4955)   |                 |                      | 0.11                   |
| 2 – 4                                        | 3.2 (2.1 – 5.0) | 2.5 (1.6 – 3.9)      |                        |
| >= 4                                         | 5.7 (3.8 – 8.8) | 4.6 (3.0 – 7.2)      |                        |
| <b>Author characteristics</b>                |                 |                      |                        |
|                                              | <b>Crude OR</b> | <b>Adjusted OR *</b> | <b>R<sup>2</sup> *</b> |
| Gender (female vs male, n = 5350)            | 0.8 (0.6 – 1.0) | 0.8 (0.6 – 1.0)      | 0.09                   |
| Region (ref: Europe)                         |                 |                      | 0.11                   |
| North-America                                | 0.9 (0.6 – 1.3) | 0.9 (0.5 – 1.4)      |                        |
| Asia                                         | 0.3 (0.2 – 0.6) | 0.2 (0.1 – 0.4)      |                        |
| Australia / New-Zealand                      | 0.5 (0.3 – 0.8) | 0.5 (0.3 – 0.8)      |                        |
| Type of Affiliation (other vs university)    | 2.4 (1.9 – 3.0) | 2.0 (1.6 – 2.6)      | 0.10                   |
| <b>Citation characteristics</b>              |                 |                      |                        |
|                                              | <b>Crude OR</b> | <b>Adjusted OR *</b> | <b>R<sup>2</sup> *</b> |
| Authority (ref: low)                         |                 |                      | 0.11                   |
| medium                                       | 2.4 (1.8 – 3.3) | 1.8 (1.3 – 2.5)      |                        |
| high                                         | 3.8 (2.9 – 5.1) | 2.9 (2.2 – 4.0)      |                        |

\* adjusted for study design. \*\* both the 'crude' and adjusted analyses are (additionally) adjusted for type of exposure. **supportive:** supportive for Strachan's original hygiene hypothesis, i.e. inverse association between siblings/infections and allergy. **non-supportive:** no association or positive association between siblings/infections and allergy. **N:** number of publications. **n:** number of potential citation paths.



# BMJ Open

## Selective citation in the literature on the hygiene hypothesis: a citation analysis on the association between infections and rhinitis

|                                 |                                                                                                                                                                                                                                                                                                                                                                                                                                                                                                                                                                                                                           |
|---------------------------------|---------------------------------------------------------------------------------------------------------------------------------------------------------------------------------------------------------------------------------------------------------------------------------------------------------------------------------------------------------------------------------------------------------------------------------------------------------------------------------------------------------------------------------------------------------------------------------------------------------------------------|
| Journal:                        | <i>BMJ Open</i>                                                                                                                                                                                                                                                                                                                                                                                                                                                                                                                                                                                                           |
| Manuscript ID                   | bmjopen-2018-026518.R1                                                                                                                                                                                                                                                                                                                                                                                                                                                                                                                                                                                                    |
| Article Type:                   | Research                                                                                                                                                                                                                                                                                                                                                                                                                                                                                                                                                                                                                  |
| Date Submitted by the Author:   | 07-Nov-2018                                                                                                                                                                                                                                                                                                                                                                                                                                                                                                                                                                                                               |
| Complete List of Authors:       | Duyx, Bram; Maastricht University NUTRIM School for Nutrition Toxicology and Metabolism<br>Urlings, Miriam; Maastricht University NUTRIM School for Nutrition Toxicology and Metabolism<br>Swaen, Gerard; Maastricht University NUTRIM School for Nutrition Toxicology and Metabolism<br>Bouter, Lex; Amsterdam University Medical Centers, Department of Epidemiology and Biostatistics; Vrije Universiteit Amsterdam, Department of Philosophy<br>Zeegers, Maurice; Maastricht University CAPHRI School for Public Health and Primary Care; Maastricht University NUTRIM School for Nutrition Toxicology and Metabolism |
| <b>Primary Subject Heading</b>: | Epidemiology                                                                                                                                                                                                                                                                                                                                                                                                                                                                                                                                                                                                              |
| Secondary Subject Heading:      | Communication, Immunology (including allergy), Epidemiology, Ethics, Medical publishing and peer review                                                                                                                                                                                                                                                                                                                                                                                                                                                                                                                   |
| Keywords:                       | EPIDEMIOLOGY, Paediatric infectious disease & immunisation < PAEDIATRICS, STATISTICS & RESEARCH METHODS, ETHICS (see Medical Ethics), IMMUNOLOGY                                                                                                                                                                                                                                                                                                                                                                                                                                                                          |
|                                 |                                                                                                                                                                                                                                                                                                                                                                                                                                                                                                                                                                                                                           |

SCHOLARONE™  
Manuscripts

1  
2  
3 **Selective citation in the literature on the hygiene hypothesis:**  
4  
5 **a citation analysis on the association between infections and rhinitis**  
6  
7  
8  
9

10 Bram Duyx<sup>1\*</sup> [b.duyx@maastrichtuniversity.nl](mailto:b.duyx@maastrichtuniversity.nl)

11 Miriam J.E. Urlings<sup>1</sup> [mje.urlings@maastrichtuniversity.nl](mailto:mje.urlings@maastrichtuniversity.nl)

12 Gerard M.H. Swaen<sup>1</sup> [g.swaen@maastrichtuniversity.nl](mailto:g.swaen@maastrichtuniversity.nl)

13 Lex M. Bouter<sup>2,3</sup> [lm.bouter@vu.nl](mailto:lm.bouter@vu.nl)

14 Maurice P. Zeegers<sup>1,4</sup> [m.zeegers@maastrichtuniversity.nl](mailto:m.zeegers@maastrichtuniversity.nl)

15  
16  
17  
18  
19  
20  
21 <sup>1</sup> Nutrition and Translational Research in Metabolism (School NUTRIM), Maastricht  
22 University, Maastricht, The Netherlands.

23  
24  
25 <sup>2</sup> Department of Epidemiology and Biostatistics, Amsterdam University Medical Centers,  
26 Amsterdam, The Netherlands

27  
28  
29 <sup>3</sup> Department of Philosophy, Faculty of Humanities, Vrije Universiteit, Amsterdam, The  
30 Netherlands

31  
32  
33 <sup>4</sup> Care and Public Health Research Institute (School CAPHRI), Maastricht University,  
34 Maastricht, The Netherlands.

35  
36 \* Corresponding author

37  
38  
39  
40  
41 **Conflict of Interest**

42 All authors declare to have no conflict of interest.

43  
44  
45  
46  
47  
48 **Funding**

49 This project has received funding from the Long-range Research Initiative (LRI) from the  
50 European Chemical Industry Council (CEFIC), grant no. LRI-Q3-UM. LRI had no role in study  
51 design, data collection and analysis, preparation of the manuscript, or decision to publish.  
52  
53  
54  
55  
56  
57

58 **Word count main text: 4,347**  
59  
60

## **Abstract**

**Objective:** Our objective was to assess the occurrence and determinants of selective citation in scientific publications on Strachan's original hygiene hypothesis. His hypothesis states that lack of exposure to infections in early childhood increases the risk of rhinitis.

**Setting:** Web of Science Core Collection.

**Participants:** We identified 110 publications in this network, consisting of 5551 potential citations.

**Primary and secondary outcome measures:** Whether a citation occurs or not, measured and analysed according to the pre-registered protocol.

**Results:** We found evidence for citation bias in this field: publications supportive of the hypothesis were cited more often than non-supportive publications (odds ratio adjusted for study design [adjOR]: 2.2, 95% confidence interval [CI]: 1.6 - 3.1), and the same was the case for publications with mixed findings (adjOR: 3.1, CI: 2.2 - 4.5). Other relevant determinants for citation were type of exposure, specificity, journal impact factor, authority and self-citation. Surprisingly, prospective cohort studies were cited less often than other empirical studies.

**Conclusions:** There is clear evidence for selective citation in this research field, and particularly for citation bias.

### **Strengths and limitations of this study**

- The study assesses how evidence regarding the hygiene hypothesis propagates over time by analysing the likelihood of citation.
- It investigates which characteristics of a publication – such as study outcome, journal impact factor, author gender and affiliation, and authority within the field – have an impact on citation.
- We check whether supportive studies are cited more often by other studies within the field, and in particular by reviews (which are supposed to give an unbiased overview of the literature).
- Limitation: only articles related to the original hygiene hypothesis are included in this analysis.

## **Background**

The hygiene hypothesis postulates that a high degree of hygiene in early life will increase the risk of developing allergies later in life (1, 2). The underlying mechanism has been the topic of scientific debate. Over time, this debate led to several adaptations and extensions of the hygiene hypothesis, which, as such, provides a good example of how science progresses. Ideally, this progress should be based on all existing evidence, but this is not always the case (3). A citation analysis can help to reveal which part of the available evidence is taken into account, and which evidence is ignored. The current study does not concern the validity of the hygiene hypothesis per se, but rather the citation relations within the scientific literature on this hypothesis.

The hygiene hypothesis was originally proposed to explain the rising prevalence of allergies, with up to 20% to 40% of the population in developed countries being affected (4). Modern, urbanized life in developed countries generally shows higher levels of hygiene than in previous times or in developing countries. Hygiene limits exposure to infections. Exposure to infections, especially early in life, helps to develop and adapt the immune system to the environment in which we happen to live, in such a way that it learns to discriminate between harmless and harmful intruders. According to the hygiene hypothesis, it is this lack of exposure to relatively harmless intruders early in life, that causes the immune system to malfunction later in life. Hence the rise in allergies.

The hygiene hypothesis has been amended several times since its early days to give rise to newer theories such as the '*old friends hypothesis*' (5, 6). According to this theory, it is not hygiene per se that is causing the rise in allergy prevalence, but the lack of exposure to *some specific* infections, and also to the gut microbiome and to non-viable intruders from the natural environment, such as endotoxins. Humans have been exposed to these 'old friends' for many centuries and our immune system has co-evolved in their presence. As a result, our immune

1  
2  
3 system has become dependent on the presence of these old friends in order to develop and  
4 function properly. This adapted hygiene hypothesis states that lack of exposure to these old  
5 friends may give rise not only to allergies, but to auto-immune diseases as well.  
6  
7  
8  
9

10 The original hygiene hypothesis and its later adaptations have a lot in common, and  
11 much of the evidence that is supportive for one hypothesis is equally supportive for the others.  
12 However, this is not always the case. In our project, publications are classified as either  
13 supportive or unsupportive with regards to a hypothesis. For that reason it is important to  
14 precisely define the investigated hypothesis. In our citation network, we focus on the hygiene  
15 hypothesis as it was originally stated by Strachan, and not on later modifications (1, 2). This  
16 allows us to investigate the development of this hypothesis from the start. Concretely, this  
17 means that we focus on the impact of infections and the number of siblings on the development  
18 of rhinitis, like in Strachan's original study (2).  
19  
20  
21  
22  
23  
24  
25  
26  
27  
28  
29

30 The number of publications in the research on the hygiene hypothesis is large. It is  
31 therefore not feasible for authors to cite every relevant publication in the network and some kind  
32 of selection needs to take place. If this selection is based on study outcome, we speak of citation  
33 bias (3, 7). The consequences of citation bias can be similar to those of publication bias and  
34 reporting bias: disregard of counter-evidence leading to unfounded consensus (8) or polarisation  
35 (9), ill-advised research programmes and research waste (8, 10), distorted information in the  
36 media (11), and misguided medical decisions (12). Citation bias has been studied in many  
37 disciplines. Our systematic review gives an overview of these studies (13) . Many of these  
38 studies showed evidence for citation bias in their field, with supportive publications being cited  
39 about twice as often as non-supportive ones.  
40  
41  
42  
43  
44  
45  
46  
47  
48  
49  
50  
51  
52  
53

54 Factors other than study outcome may also have an impact on citation, as was recently  
55 shown by Onodera and Yoshikane (14). Measures for journal status (impact factor), author  
56 status (number of citations, country of affiliation), and collaboration (number of authors,  
57  
58  
59  
60

1  
2  
3 number of affiliations) were often found to be related to citation count. The same was  
4  
5 consistently found for the number of references of the cited publication. Furthermore, the  
6  
7 reporting (15) and source (16, 17) of funding were shown to be related to citation, but the  
8  
9 impact of author's affiliation (18) and gender (19-21) is less clear. On the other hand, sample  
10  
11 size and study design - both markers of study quality, and as such legitimate reasons to base a  
12  
13 citation on - often seem unrelated to citation (17, 18, 22-24). In our previous citation networks,  
14  
15 we also found associations with self-citation and the specificity of a publication, but not with the  
16  
17 title of a publication (25, 26).  
18  
19  
20

21  
22 In our study, we aimed a) to assess the occurrence of citation bias in the scientific  
23  
24 literature on the original hygiene hypothesis; and b) test for other signs of selective citation by  
25  
26 assessing the impact of the other factors described above. We will make use of the claim-  
27  
28 specific methodology developed by Greenberg (8), but with a modification of the statistical  
29  
30 analysis that allows us to test the impact of multiple factors, adjust for study design and take into  
31  
32 account the variation in publication time.  
33  
34  
35  
36  
37  
38  
39

## 40 **Method**

41  
42 Prior to performing the citation network analysis, we described our methods in a study protocol  
43  
44 and stored it at an online repository (27). (Protocol deviations are described in the supplement,  
45  
46 Text S1.) In brief, we applied a search strategy to the Web of Science Core Collection  
47  
48 (WoSCC), identified relevant literature, downloaded these records with their reference lists,  
49  
50 extracted data for each publication, built a dataset with potential citation paths and used  
51  
52 specialised software to determine which citations had occurred. These steps will be explained in  
53  
54 more detail below. Article selection (first based on title, then on abstract and finally full-text;  
55  
56  
57  
58  
59  
60

1  
2  
3 Figure 1) and data extraction were performed independently by MJEU and BD. Results were  
4 compared after each step, and disagreements were resolved in consensus meetings.  
5  
6

7  
8 For clarification: a publication in our network can both cite and be cited by other  
9 publications in the network, leading to a multitude of citation paths. Not all citation paths are  
10 possible as one can only cite articles that were published before. In our study, a citation is  
11 considered possible if the cited publication is published before the citing publication is  
12 submitted. If such *potential* citation occurred, we call it an *actual* citation. (See also  
13 supplementary Text S2.)  
14  
15  
16  
17  
18  
19  
20  
21  
22

### 23 **Search strategy**

24  
25 First, we took Strachan's seminal article in which the hygiene hypothesis was launched as point  
26 of departure (2). Next, we identified all literature within WoSCC referring to this article.  
27  
28 Finally, we limited the output to publications that mentioned hay fever in their title, keywords or  
29 abstract ("*hay fever*" OR "*hayfever*" OR "*hay-fever*" OR "*rhinitis*" OR "*rhino\**"). The search  
30 was performed by BD and updated until 16 August 2017. Only English language publications  
31 were included.  
32  
33  
34  
35  
36  
37  
38  
39

40 The search output was then limited to publications that investigated exposures related to  
41 the original hygiene hypothesis. This means that only publications investigating the effect of  
42 *number of siblings* and *infection history* were included. Publications on helminths infections  
43 were excluded, as different versions of the hygiene hypothesis would make contradictory  
44 predictions regarding their impact on allergies. Both empirical and non-empirical publications  
45 were included.  
46  
47  
48  
49  
50  
51  
52  
53

### 54 **Data extraction**



1  
2  
3 A range of characteristics were extracted or derived from each included publication. These  
4 characteristics are described below and were all tested as determinant of citation in the statistical  
5 analysis.  
6  
7  
8  
9

10 **Publication characteristics – content-related.** The following variables were in this  
11 subcategory: type of exposure, publication type, sample size, specificity, and study outcome.  
12

13 *Type of exposure* refers to the type of exposure that is being studied or reviewed: only  
14 number of siblings, only infection history, or both.  
15  
16  
17

18 *Publication type* was classified into empirical and non-empirical publications. Empirical  
19 publications were further classified into the following *study designs*: cross-sectional, case-  
20 control, retrospective cohort, prospective cohort, and experimental studies. Non-empirical  
21 publications were further classified into: narrative reviews, systematic reviews, and other  
22 (editorials, leading articles, commentaries).  
23  
24  
25  
26  
27  
28  
29

30 *Sample size* concerned the number of participants in the publications. Non-empirical  
31 publications had no sample size. The sample size of the empirical publications was classified  
32 into three equal categories based on tertiles.  
33  
34  
35  
36

37 The *specificity* of the publications varied. Some publications only deal with Strachan's  
38 hygiene hypothesis, others are broader. Specificity ranges from 1 (very broad) to 3 (very  
39 specific). For instance, an empirical publication that only investigates the association between  
40 number of siblings and rhinitis would be classified as '3'; if it also investigates the impact of  
41 helminth infections and growing up on a farm, and if it also includes other health outcomes such  
42 as asthma or auto-immune diseases, it would be classified as '1'.  
43  
44  
45  
46  
47  
48  
49

50 *Study outcome* was scored as follows: 1. supportive of the hygiene hypothesis; 2. mixed  
51 or unclear results; 3. non-supportive of the hygiene hypothesis. An inverse relationship between  
52 past exposure and rhinitis is considered to be supportive for the hygiene hypothesis, while a  
53 neutral or positive relationship was scored as non-supportive. The scoring was based on the  
54  
55  
56  
57  
58  
59  
60

1  
2  
3 authors' interpretation of the results, as it was stated in the text of the publication. (See also Text  
4  
5 S2 for more details.)  
6

7  
8 **Publication characteristics - not content-related.** The following variables were in this  
9  
10 category: conclusiveness of the title, funding source, number of authors, number of affiliations,  
11  
12 and number of references. *Title conclusiveness* was coded as yes if in the title a conclusion was  
13  
14 stated that included the direction of the relationship (e.g. "Inverse relation between infections  
15  
16 and allergies"), otherwise as no (e.g. "Infections, rhinitis, and their relationship"). *Funding*  
17  
18 *source* was coded as non-profit (e.g. government or university), for-profit, both, or not reported.  
19  
20

21  
22 **Journal characteristics.** The following variables were in this category: publisher and  
23  
24 journal impact factor. *Journal impact factor*, in the publication year of the cited publication, was  
25  
26 retrieved from the Journal Citation Reports (JCR) database. *Journal publisher* was also retrieved  
27  
28 from JCR.  
29

30  
31 **Author characteristics.** The following variables were in this category: *gender* of the  
32  
33 corresponding author (see also Text S2), *country* of the corresponding author, and affiliation of  
34  
35 the corresponding author. *Affiliation* was classified as government, university, industry or other.  
36

37  
38 **Citation characteristics.** There were some variables that depend on the cited  
39  
40 publication as well as the citing publication: self-citation and within-network authority. A *self-*  
41  
42 *citation* was defined as a citation between two publications that have at least one author in  
43  
44 common.  
45

46  
47 *Authority* was a measure for the authority of the authors within the network. It was  
48  
49 calculated for each author and each year separately, by counting the number of within-network  
50  
51 citations to all publications in which the author had been involved. As the number of citations is  
52  
53 likely to increase each year, so does the author's authority. Because we were interested in the  
54  
55 authority at the moment of citation, the authority value of a cited publication also depends on  
56  
57  
58  
59  
60

1  
2  
3 the publication year of the citing publication. In case of multiple authors, we used the authority  
4 value of the author with the highest authority in that year.  
5  
6  
7  
8  
9

### 10 **Statistical analysis**

11  
12 The dataset consisted of all potential citation paths between cited and citing publications. A  
13 potential citation path means that the cited publication is published before submission of the  
14 citing publication. The underlying assumption is that publications can only cite other  
15 publications up to the date of submission of the citing publication, and that publications can only  
16 be cited from their publication date onwards. All analyses were pre-registered in the study  
17 protocol unless mentioned otherwise.  
18  
19  
20  
21  
22  
23  
24  
25

26 **Impact of the cited publication characteristics.** Our binary dependent variable was  
27 citation within the network (or, more precisely, whether a potential citation had occurred or not).  
28 This was determined by the built-in algorithm of CitNetExplorer (28). This algorithm makes use  
29 of reference lists that can be downloaded from the Web of Science Core Collection. It links the  
30 reference lists of all publications in the network with the actual publications in the network. If  
31 possible, this linkage was done by DOI, the unique Digital Object Identifier assigned to most  
32 present-day publications; otherwise it was based on a combination of first author's surname,  
33 first author's first initial, publication year, volume number and first page number. The  
34 determinants of citation in our analyses were the characteristics of the cited publication as  
35 described above.  
36  
37  
38  
39  
40  
41  
42  
43  
44  
45  
46  
47  
48

49 Since each publication could refer to multiple other publications, the potential citation  
50 paths were related. Therefore we used a multilevel approach in which the potential citations  
51 were nested under the citing publication. Specifically, we performed a univariate random-effects  
52 logistic regression for each determinant of citation. We repeated these analyses while adjusting  
53 for study design, as a proxy for study quality. Another proxy for study quality would be the  
54  
55  
56  
57  
58  
59  
60

1  
2  
3 study sample size. However, as reviews do not have a sample size, this adjusted analysis could  
4  
5 only be performed on the sub-selection of cited empirical publications so we did not adjust for  
6  
7 sample size in the main analysis.  
8  
9

10 In addition to the original analysis plan in the protocol, we also calculated the explained  
11  
12 variance of the adjusted models, so that these models are easier to compare. For this purpose we  
13  
14 calculated McFadden's  $R^2$ .  
15  
16

17 **Additional analyses** were performed on sub-selections of the network: a) only cited  
18  
19 empirical publications were included (to investigate which empirical evidence is picked up by  
20  
21 the rest of the field; explorative analysis); b) only cited empirical publications and citing  
22  
23 synthesis publications were included (to investigate which empirical evidence is picked up  
24  
25 particularly by reviews and editorials). These analyses were adjusted not only for study design  
26  
27 but also for log-transformed sample size because in these sub-selections all cited publications  
28  
29 had a sample size.  
30  
31  
32

33 To check the robustness of our findings we also ran some sensitivity analyses in which  
34  
35 the following publications or citation paths were excluded: c) the most cited publications  
36  
37 (explorative analysis); d) citation paths with less than one year between publication date of the  
38  
39 cited publication and submission date of the citing publication were excluded (to check if a lag  
40  
41 time would make a difference as it takes some time before most publications are known and  
42  
43 have an impact); e) citing publications that have less than ten potential citations.  
44  
45  
46

47 **Concordance analysis.** Where applicable, we also calculated whether the cited and the  
48  
49 citing publications had the same characteristics (*concordance*). This would, for instance, be the  
50  
51 case if supportive publications would prefer to cite other supportive publications, and if non-  
52  
53 supportive publications would prefer to cite other non-supportive publications. If citation would  
54  
55 be based on the concordance of study outcome, it would be another measure of citation bias. To  
56  
57 test if concordance on several characteristics has an impact on the likelihood of citation,  
58  
59  
60

1  
2  
3 univariate and adjusted (for study design) fixed-effects logistic regression analyses were  
4  
5 applied.  
6  
7  
8  
9

## 10 **Software**

11  
12 We used the built-in algorithm of CitNetExplorer 1.0.0 to extract the actual citations between  
13  
14 publications (28). We used R 3.2.4 to create a dataset with all potential citation paths, based on  
15  
16 the data extraction sheet and the actual citations, and also to calculate the within-network  
17  
18 authority and self-citation score for each potential citation path. Finally, we used Stata 13.1 to  
19  
20 analyse the results.  
21  
22  
23  
24  
25

## 26 **Patient and public involvement**

27  
28 No patients were involved in this study.  
29  
30  
31  
32

## 33 **Results**

34  
35 A total number of 110 publications were identified that fit our criteria, published between 1995  
36  
37 and 2017 (Figure 1, Text S3). Of these, 28 publications focused exclusively on the impact of  
38  
39 household size on rhinitis, 48 on the impact of having had infections, and 34 on the impact of  
40  
41 both types of exposure. This network of 110 publications had a total of 5551 potential and 392  
42  
43 actual citation paths (7%) between these publications. Their main characteristics are depicted in  
44  
45 Table 1 (for more details see Table S1). About two thirds of all publications in the network are  
46  
47 empirical studies (39 cross-sectional, 4 case control, 29 cohort studies, and 1 intervention), one  
48  
49 third are reviews (27 narrative reviews, 2 systematic reviews, and 8 editorials or leading  
50  
51 articles). The study outcome for 35 of the publications was mixed or unclear. Of the remaining  
52  
53 publications with a clear study outcome, about 50% was supportive of the hygiene hypothesis  
54  
55 (41 publications with an inverse association between siblings / infection and rhinitis), and about  
56  
57  
58  
59  
60

1  
2  
3 50% was non-supportive (34 publications with no association, or with a positive association).  
4  
5 The number of citations ranged from 0 (45 publications) to 35, with a median of 1 citation per  
6  
7 publication. A ranking of the most cited publications and authors can be found in Table S2.  
8  
9

10 **Impact of the cited publication characteristics.** The results of the regression analyses  
11 are presented in Table 2. Empirical publications were cited more often than non-empirical  
12  
13 publications. Compared to empirical studies with a cross-sectional design, prospective cohort  
14  
15 studies, narrative reviews and editorials had a lower likelihood of citation, while the two  
16  
17 systematic reviews had a higher likelihood of citation. Other determinants that increased the  
18  
19 likelihood of citation were specificity, journal impact factor, sample size and within-network  
20  
21 authority. Sample size had a modest impact on citation. Publications on only one type of  
22  
23 exposure were cited less often than publications on both types of exposure.  
24  
25  
26  
27

28 Supportive publications had a higher likelihood of being cited than non-supportive  
29  
30 publications. This is in line with our hypothesis. However, publications with mixed results were  
31  
32 cited even more often. This may be due to our scoring algorithm. After all, if a publication  
33  
34 investigated both the number of siblings and the infection history, and it reported dissimilar  
35  
36 outcomes for these two exposures, then this publication would have been scored as having  
37  
38 mixed results. An explorative chi-square test confirmed that type of exposure and study outcome  
39  
40 were related ( $\chi^2(4) = 52, p < 0.0005$ ), with 71% of all publications on both types of exposure  
41  
42 reporting mixed results, compared to 4% of the publications on only number of siblings and  
43  
44 21% of the publications on only infection history. As double exposure studies are also cited  
45  
46 more often compared to the single exposure studies, type of exposure should be considered as a  
47  
48 confounder of study outcome. To correct for this, we performed an explorative random-effects  
49  
50 logistic regression of citation on study outcome, adjusted for both study design and type of  
51  
52 exposure. It showed that supportive publications had the highest chance of being cited (adjusted  
53  
54 odds ratio [adjOR] 3.1, 95% confidence interval [CI] 2.2-4.3), compared to publications with  
55  
56  
57  
58  
59  
60

1  
2  
3 mixed results (adjOR 2.4, CI 1.5-3.7) and with non-supportive results (reference category;  
4  
5 model  $R^2 = 0.12$ ).

6  
7 Surprisingly, publications with a conclusive title were less likely to receive citations. The  
8  
9 format of the title may be prescribed by the journal regulations. We ran some explorative  
10  
11 analyses in which we additionally adjusted for the (log-transformed) journal impact factor or  
12  
13 publisher on top of study design. The impact of title conclusiveness remained high when  
14  
15 additionally adjusted for journal impact factor (adjOR 0.4, CI 0.2-0.6) or publisher (adjOR 0.3,  
16  
17 CI 0.2-0.6).

18  
19  
20  
21 The above results are related to the network as a whole. Of particular importance is how  
22  
23 empirical, evidence-generating publications were cited by the rest of the network. We repeated  
24  
25 the above analyses on a subset of the cited publications, namely the empirical publications, and  
26  
27 tested which of their characteristics were related to citation. The results (Table S3) are very  
28  
29 similar to the analyses on the complete network that include the cited non-empirical  
30  
31 publications.

32  
33  
34  
35 Likewise, we tested how *empirical* publications were cited by *synthesis* publications  
36  
37 (Table S4). Again, the direction and magnitudes of the effects were all very similar, except for  
38  
39 study outcome. Adjusted for study design, (log-transformed) sample size and type of exposure,  
40  
41 supportive empirical publications were much more likely to be cited (adjusted OR 7.3, CI 3.5-  
42  
43 15.5) by reviews and editorials, whereas empirical publications with mixed results seemed less  
44  
45 likely to be cited (adjusted OR 0.4, CI 0.2-0.9) compared to non-supportive empirical  
46  
47 publications (reference category; model  $R^2 = 0.12$ ). As a side note: these analyses are based on a  
48  
49 smaller number of cited and citing publications and should be interpreted with caution.  
50  
51

52  
53 The sensitivity analyses without the four most cited publications showed some dissimilar  
54  
55 results (Table S5). The impact of study outcome decreased, the impact of male authors and of  
56  
57 North-American authors disappeared, and the impact of case-control studies reversed. The other  
58  
59  
60

1  
2  
3 two sensitivity analyses (with a one year lag time immediately after publication; without citing  
4 publications with less than 10 potential citation paths) all showed similar results as the main  
5 analyses (Tables S6-S7).  
6  
7  
8  
9

10 **Concordance analysis.** In addition, we tested whether publications were more likely to  
11 be cited by publications with similar characteristics. The results are shown in Table 3. It shows  
12 that publications tended to be cited mostly by publications with the same type of exposure, with  
13 a similar study outcome, with a corresponding author from the same region, and with one or  
14 more authors in common ('self-citation').  
15  
16  
17  
18  
19  
20  
21  
22  
23  
24  
25

## 26 Discussion

27  
28 Our research aim was to evaluate the impact of study outcome and other factors on the  
29 likelihood of being cited in the scientific literature on the original hygiene hypothesis stated by  
30 David Strachan (2). We found that study outcome, type of exposure, study design, specificity,  
31 title conclusiveness, journal impact factor, and the authors' region, affiliation, authority and self-  
32 citation all have a substantial impact on the likelihood of citation.  
33  
34  
35  
36  
37  
38  
39  
40

41 With regard to study outcome, supportive publications are cited more than three times  
42 more often than non-supportive publications, while publications with mixed results are cited  
43 more than two times as often. This is a clear sign of citation bias, and corroborates previous  
44 findings (13). Similarly, publications are more likely to refer to other publications with the same  
45 study outcome rather than to those that provide counter-evidence to their conclusion. This type  
46 of citation bias (based on concordance) has not been studied frequently. In our previous network  
47 analyses, on trans fatty acids – cholesterol, and on chlorinated water – asthma, we found no  
48 evidence for increased citations between publications with the same study outcomes (25, 26),  
49 but three other studies, all related to cardiovascular disease, did find evidence for this type of  
50  
51  
52  
53  
54  
55  
56  
57  
58  
59  
60



1  
2  
3 citation bias (9, 29, 30).  
4  
5

6 The magnitude of citation bias even increases if we focus on how empirical publications  
7 are cited by reviews and editorials. Reviews and editorials in our network are up to 8 times more  
8 likely to cite supportive publications rather than non-supportive ones. As reviews are generally  
9 assumed to give an unbiased summary of the existing evidence, this is a worrying finding. It  
10 confirms the notion that people should be cautious to rely on narrative reviews.  
11  
12  
13  
14  
15  
16  
17

18  
19 Greenberg states that reviews play an important role in the development and acceptance  
20 of belief systems (8). According to him, reviews can amplify the impact of empirical studies  
21 because their evidence is propagated when these reviews are cited themselves. Trinquart et al.  
22 showed that reviews (including systematic reviews) on the health impact of salt intake display  
23 signs of citation bias, and that the conclusions of these reviews were in the same direction as the  
24 evidence they include (9). A similar link between the selective citation of supportive evidence  
25 and supportive conclusions of reviews was found by Leng (29). This mechanism might explain  
26 how reviews can amplify the effect of citation bias. If reviews draw supportive conclusions  
27 based on selective citation of supportive evidence, then support for a hypothesis will be  
28 propagated while counter-evidence will fade from the literature.  
29  
30  
31  
32  
33  
34  
35  
36  
37  
38  
39  
40  
41  
42

43 In our analyses we consider study design as a proxy for study quality. We believe  
44 systematic reviews to be of higher quality than narrative reviews and editorials, and thus to  
45 receive more citations. In our network, this is indeed the case. Similarly, we believe that cohort  
46 studies outrank cross-sectional and case-control studies but to our surprise they are less likely to  
47 be cited. Prospective cohort studies, even though they provide the highest type of evidence in  
48 this network, receive the fewest citations of all empirical study designs. This may be due to the  
49 fact that these cohort studies tend to focus on multiple risk factors of which only one or two are  
50 relevant for the hygiene hypothesis. But the fact that multiple risk factors are investigated in  
51  
52  
53  
54  
55  
56  
57  
58  
59  
60

1  
2  
3 these cohort studies does not imply that their findings on the impact of siblings or infections are  
4  
5 of any lesser value or should be ignored.  
6  
7

8  
9 This study has several limitations. First, it includes two overlapping sub-networks, as is  
10  
11 shown by the high odds ratio in the concordance analysis of type of exposure. This makes it  
12  
13 difficult to infer for which result a certain publication was cited. Related to this issue, the pre-  
14  
15 registered operationalization of study outcome could not be applied because of the hybrid nature  
16  
17 of the network, so we developed a scoring system that fits better. Also, there are different  
18  
19 versions of the hygiene hypothesis, and support for one version may not be supportive for  
20  
21 another one. We dealt with this issue by limiting ourselves to Strachan's original hygiene  
22  
23 hypothesis, and by excluding any determinants with conflicting predictions in different versions.  
24  
25 Despite these limitations, sensitivity analyses show that the results seem robust against chance  
26  
27 findings. Another limitation is our use of odds ratios to assess the likelihood of citation. The  
28  
29 odds ratio may overestimate the true relative risk in studies where the outcome is common (i.e.  
30  
31 occurs in more than 5% of all cases, (31)). In our network, citation is not a common outcome  
32  
33 (7%) and consequently the overestimation of the true relative risk will be relatively small.  
34  
35  
36  
37  
38

39 To conclude, there is evidence for selective citation in this network. Several  
40  
41 characteristics of a publication can make it more likely to be cited such as the authority and the  
42  
43 region of the author, the impact factor of the journal, the way in which the title was stated, and  
44  
45 also study design and study outcome. The fact that supportive publications are cited more often  
46  
47 than non-supportive ones, particularly if we look at how empirical publications are being picked  
48  
49 up by the rest of the network, is a clear sign of citation bias. Finally, this study also shows that  
50  
51 particularly narrative reviews may have a preference to refer to supportive evidence.  
52  
53  
54  
55  
56  
57  
58

59 **Availability of data and material:**  
60

1  
2  
3 The protocol and the data of this study are available upon request in the DataVerse repository,  
4 <http://hdl.handle.net/10411/ZKGGOG>, or by sending an email to  
5  
6  
7  
8 b.duyx@maastrichtuniversity.nl.  
9

### 11 **Author Contributions:**

12  
13  
14 BD was involved in the research design and data analysis plan, prepared the research protocol,  
15 developed and performed the search strategy, wrote the R scripts for data transformation and  
16 calculation, performed article selection and data extraction, conducted the analyses and wrote  
17 the manuscript. MJEU was involved in the research design and data analysis plan, performed the  
18 article selection and data extraction, and read, commented on and approved the final manuscript.  
19  
20  
21 GMHS obtained funding, was involved in the research design and data analysis plan, and read,  
22 commented on and approved the final manuscript. MPZ obtained funding, was involved in the  
23 research design and data analysis plan, and read, commented on and approved the final  
24 manuscript. LMB was involved in the research design and data analysis plan, and read,  
25 commented on and approved the final manuscript.  
26  
27  
28  
29  
30  
31  
32  
33  
34  
35  
36  
37  
38  
39

### 40 **Transparency declaration:**

41  
42 The guarantor affirms that the manuscript is an honest, accurate, and transparent account of the  
43 study being reported; that no important aspects of the study have been omitted; and that any  
44 discrepancies from the study as planned and registered have been explained in the supplement.  
45  
46  
47  
48  
49  
50

### 51 **Copyright statement:**

52  
53 This is an Open Access article distributed in accordance with the terms of the Creative  
54 Commons Attribution (CC BY 4.0) license, which permits others to distribute, remix, adapt and  
55 build upon this work, for commercial use, provided the original work is properly cited. See:  
56  
57  
58  
59  
60 <http://creativecommons.org/licenses/by/4.0/>.

## References

1. Strachan D. Family size, infection and atopy: the first decade of the 'hygiene hypothesis'. *Thorax*. 2000;55(suppl 1):S2-10.
2. Strachan DP. Hay-fever, hygiene, and household size. *BMJ*. 1989;299(6710):1259-60.
3. Song F, Parekh S, Hooper L, Loke YK, Ryder J, Sutton AJ, et al. Dissemination and publication of research findings: An updated review of related biases. *Health Technol Assess*. 2010;14(8):1-193.
4. Platts-Mills TAE. The allergy epidemics: 1870-2010. *J Allergy Clin Immunol*. 2015;136(1):3-13.
5. Rook GA. Regulation of the immune system by biodiversity from the natural environment: An ecosystem service essential to health. *Proc Natl Acad Sci U S A*. 2013;110(46):18360-7.
6. Rook GA. Evolution, human-microbe interactions and the "epidemic" of inflammation-related disorders (alias: the hygiene hypothesis). *The Biomedical & Life Sciences Collection: Henry Stewart Talks Ltd, London; 2016*.
7. Fanelli D. Positive results receive more citations, but only in some disciplines. *Scientometrics*. 2013;94(2):701-9.
8. Greenberg SA. How citation distortions create unfounded authority: Analysis of a citation network. *BMJ*. 2009;339.
9. Trinquart L, Johns DM, Galea S. Why do we think we know what we know? A metaknowledge analysis of the salt controversy. *Int J Epidemiol*. 2016;45(1):251-60.
10. Andrade NS, Flynn JP, Bartanusz V. Twenty-year perspective of randomized controlled trials for surgery of chronic nonspecific low back pain: Citation bias and tangential knowledge. *Spine J*. 2013;13(11):1698-704.
11. Chapman S, Ragg M, McGeechan K. Citation bias in reported smoking prevalence in people with schizophrenia. *Aust NZ J Psychiat*. 2009;43(3):277-82.
12. Koren G, Nickel C. Perpetuating fears: bias against the null hypothesis in fetal safety of drugs as expressed in scientific citations. *J Popul Ther Clin Pharmacol*. 2011;18(1).

13. Duyx B, Urlings MJE, Swaen GMH, Bouter LM, Zeegers MP. Scientific citations favor positive results: a systematic review and meta-analysis. *J Clin Epidemiol*. 2017;88:92-101.
14. Onodera N, Yoshikane F. Factors affecting citation rates of research articles. *Journal of the Association for Information Science and Technology*. 2015;66(4):739-64.
15. Rigby J. Looking for the impact of peer review: does count of funding acknowledgements really predict research impact? *Scientometrics*. 2013;94(1):57-73.
16. Conen D, Torres J, Ridker PM. Differential citation rates of major cardiovascular clinical trials according to source of funding: a survey from 2000 to 2005. *Circulation*. 2008;118(13):1321-7.
17. Kulkarni AV, Busse JW, Shams I. Characteristics associated with citation rate of the medical literature. *PLoS One*. 2007;2(5).
18. Kostoff RN. The difference between highly and poorly cited medical articles in the journal *Lancet*. *Scientometrics*. 2007;72(3):513-20.
19. Dion ML, Sumner JL, Mitchell SM. Gendered Citation Patterns across Political Science and Social Science Methodology Fields. *Political Analysis*. 2018;26(3):312-27.
20. Esarey J, Bryant K. Are Papers Written by Women Authors Cited Less Frequently? *Political Analysis*. 2018;26(3):331-4.
21. Ostby G, Strand H, Nordas R, Gleditsch NP. Gender Gap or Gender Bias in Peace Research? Publication Patterns and Citation Rates for *Journal of Peace Research*, 1983-2008. *International Studies Perspectives*. 2013;14(4):493-506.
22. Annalingam A, Damayanthi H, Jayawardena R, Ranasinghe P. Determinants of the citation rate of medical research publications from a developing country. *SpringerPlus*. 2014;3:140-.
23. Callaham M, Wears RL, Weber E. Journal prestige, publication bias, and other characteristics associated with citation of published studies in peer-reviewed journals. *JAMA*. 2002;287(21):2847-50.
24. Nieminen P, Rucker G, Miettunen J, Carpenter J, Schumacher M. Statistically significant papers in psychiatry were cited more often than others. *J Clin Epidemiol*. 2007;60(9):939-46.
25. Duyx B, Urlings MJE, Swaen GMH, Bouter LM, Zeegers MP. Selective citation in the literature on swimming in chlorinated water and childhood asthma: a network analysis. *Research Integrity and Peer Review*. 2017;2(1):17.

- 1  
2  
3 26. Urlings MJE, Duyx B, Swaen G, Bouter LM, Zeegers MP. Citation bias in the literature  
4 on dietary trans fatty acids and serum cholesterol. J Clin Epidemiol. in press.  
5  
6 27. Duyx B, Urlings MJE, Swaen G, Bouter LM, Zeegers MP. Protocol for citation analysis  
7 of the published literature on the hygiene hypothesis 2017 [Available from: Dataverse  
8 <http://hdl.handle.net/10411/ZKGGOG>].  
9  
10  
11 28. van Eck NJ, Waltman L. CitNetExplorer: A new software tool for analyzing and  
12 visualizing citation networks. Journal of Informetrics. 2014;8(4):802-23.  
13  
14 29. Leng RI. A network analysis of the propagation of evidence regarding the  
15 effectiveness of fatcontrolled diets in the secondary prevention of coronary heart disease  
16 (CHD): Selective citation in reviews. PLoS ONE. 2018;13(5).  
17  
18 30. Sawin VI, Robinson KA. Biased and inadequate citation of prior research in reports  
19 of cardiovascular trials is a continuing source of waste in research. J Clin Epidemiol.  
20 2016;69:174-8.  
21  
22 31. Cummings P. The relative merits of risk ratios and odds ratios. Archives of  
23 pediatrics & adolescent medicine. 2009;163(5):438-45.  
24  
25  
26  
27  
28  
29  
30  
31  
32  
33  
34  
35

### 36 **Figure Legends**

37  
38 Figure 1. Flow diagram of article selection process.  
39  
40  
41  
42  
43  
44  
45  
46  
47  
48  
49  
50  
51  
52  
53  
54  
55  
56  
57  
58  
59  
60

**Table 1. Main characteristics of all 110 publications in hygiene hypothesis network.**

| Characteristic                                   | category                   | N publications | n potential citations | n actual citations (%) |
|--------------------------------------------------|----------------------------|----------------|-----------------------|------------------------|
| Type of Exposure                                 | only Number of Siblings    | 28             | 1512                  | 100 (7%)               |
|                                                  | only Infection History     | 48             | 1946                  | 144 (7%)               |
|                                                  | both Siblings & Infections | 34             | 2093                  | 148 (7%)               |
| Study Outcome                                    | supportive                 | 41             | 2322                  | 198 (9%)               |
| Exposure - Rhinitis                              | mixed results              | 35             | 1913                  | 129 (7%)               |
|                                                  | non-supportive             | 34             | 1316                  | 65 (5%)                |
| Publication Type / Study Design                  | Empirical                  | 73             | 3517                  | 337 (10%)              |
|                                                  | cross-sectional            | 39             | 1697                  | 179 (11%)              |
|                                                  | case-control               | 4              | 249                   | 36 (14%)               |
|                                                  | cohort                     | 29             | 1535                  | 121 (8%)               |
|                                                  | -retrospective             | 15             | 817                   | 89 (11%)               |
|                                                  | -prospective               | 14             | 718                   | 32 (4%)                |
|                                                  | intervention               | 1              | 36                    | 1 (3%)                 |
|                                                  | Synthesis                  | 37             | 2034                  | 55 (3%)                |
|                                                  | narrative review           | 27             | 1423                  | 16 (1%)                |
| systematic review                                | 2                          | 80             | 20 (25%)              |                        |
| editorial, etc                                   | 8                          | 531            | 19 (4%)               |                        |
| Sample Size<br>(cat; for empirical publications) | low (1 – 999)              | 24             | 909                   | 56 (6%)                |
|                                                  | medium (1000 – 7999)       | 25             | 1327                  | 143 (11%)              |
|                                                  | high (>= 8000)             | 24             | 1281                  | 138 (11%)              |
| Journal Impact Factor (cat)                      | 0 - 2                      | 28             | 1275                  | 27 (2%)                |
|                                                  | 2 - 4                      | 41             | 2087                  | 145 (7%)               |
|                                                  | >= 4                       | 32             | 1671                  | 176 (11%)              |
| Gender                                           | male                       | 65             | 3368                  | 265 (8%)               |
|                                                  | female                     | 42             | 2024                  | 123 (6%)               |
|                                                  | unclear                    | 3              | 159                   | 4 (3%)                 |
| Affiliation                                      | university                 | 88             | 4402                  | 258 (6%)               |
|                                                  | government                 | 9              | 410                   | 22 (5%)                |
|                                                  | industry / other           | 13             | 739                   | 112 (15%)              |
| Country                                          | Europe                     | 62             | 3903                  | 324 (8%)               |
|                                                  | North-America              | 19             | 688                   | 38 (6%)                |
|                                                  | Asia                       | 21             | 484                   | 9 (2%)                 |
|                                                  | Australia / New Zealand    | 8              | 476                   | 21 (4%)                |
| <b>Total</b>                                     |                            | <b>110</b>     | <b>5551</b>           | <b>392 (7%)</b>        |

**Table 2. Odds ratios (95% CIs) for the chance of being cited, all types of publications included, N = 110, n = 5551 )**

| <b>Publication characteristics,</b>                |                  |                      |                        |
|----------------------------------------------------|------------------|----------------------|------------------------|
| <b>content-related</b>                             | <b>Crude OR</b>  | <b>Adjusted OR *</b> | <b>R<sup>2</sup> *</b> |
| Type of Exposure (ref: both Siblings & Infections) |                  |                      | 0.10                   |
| only Number of Siblings                            | 0.8 (0.6 – 1.1)  | 0.5 (0.4 – 0.7)      |                        |
| only Infection History                             | 1.3 (0.97–1.6)   | 0.8 (0.6 – 1.1)      |                        |
| Study Outcome (ref: non-supportive results)        |                  |                      | 0.11                   |
| mixed / unclear results                            | 1.2 (0.9 – 1.7)  | 3.1 (2.2 – 4.5)      |                        |
| supportive results                                 | 1.5 (1.1 – 2.0)  | 2.2 (1.6 – 3.1)      |                        |
| <b>Publication characteristics,</b>                |                  |                      |                        |
| <b>other content-related</b>                       | <b>Crude OR</b>  | <b>Adjusted OR *</b> | <b>R<sup>2</sup> *</b> |
| Publication Type (empirical vs synthesis)          | 4.3 (3.2 – 5.7)  |                      | 0.04 (crude)           |
| Study Design (ref: cross-sectional)                |                  |                      | 0.09 (crude)           |
| case control                                       | 1.4 (0.9 – 2.2)  |                      |                        |
| retrospective cohort                               | 0.9 (0.7 – 1.2)  |                      |                        |
| prospective cohort                                 | 0.3 (0.2 – 0.5)  |                      |                        |
| narrative review                                   | 0.1 (0.0 – 0.1)  |                      |                        |
| systematic review                                  | 3.3 (1.8 – 5.8)  |                      |                        |
| editorial / other                                  | 0.3 (0.2 – 0.4)  |                      |                        |
| Sample Size (ref: low, n = 3517)                   |                  |                      | 0.02                   |
| medium                                             | 1.6 (1.2 – 2.3)  | 1.6 (1.0 – 2.6)      |                        |
| high                                               | 1.6 (1.2 – 2.3)  | 1.9 (1.2 – 3.0)      |                        |
| Specificity (ref: low)                             |                  |                      | 0.11                   |
| medium                                             | 2.5 (1.5 – 4.0)  | 2.7 (1.6 – 4.5)      |                        |
| high                                               | 8.8 (5.8 – 13.5) | 5.0 (3.1 – 7.9)      |                        |



| <b>Publication characteristics,</b>          |                 |                      |                        |
|----------------------------------------------|-----------------|----------------------|------------------------|
| <b>not content-related</b>                   | <b>Crude OR</b> | <b>Adjusted OR *</b> | <b>R<sup>2</sup> *</b> |
| Conclusive Title (yes vs no)                 | 0.4 (0.3 – 0.7) | 0.3 (0.2 – 0.4)      | 0.10                   |
| Funding Source (ref: exclusively non-profit) |                 |                      | 0.09                   |
| profit or both profit/non-profit             | 0.9 (0.6 – 1.2) | 0.8 (0.6 – 1.2)      |                        |
| not reported                                 | 0.4 (0.3 – 0.5) | 0.8 (0.6 – 1.0)      |                        |
| Number of Authors (ref: 1-2)                 |                 |                      | 0.09                   |
| 3 - 5                                        | 1.9 (1.4 – 2.5) | 1.0 (0.7 – 1.5)      |                        |
| >= 6                                         | 3.6 (2.7 – 4.9) | 1.5 (1.0 – 2.4)      |                        |
| Number of Affiliations (ref: 1)              |                 |                      | 0.09                   |
| 2                                            | 2.6 (2.0 – 3.5) | 1.8 (1.3 – 2.5)      |                        |
| >= 3                                         | 2.1 (1.6 – 2.8) | 1.6 (1.1 – 2.2)      |                        |
| Number of References (ref: <30)              |                 |                      | 0.09                   |
| 30 - 50                                      | 1.1 (0.8 – 1.3) | 1.0 (0.8 – 1.2)      |                        |
| >= 50                                        | 0.4 (0.3 – 0.6) | 0.8 (0.5 – 1.3)      |                        |
| <b>Journal characteristics</b>               |                 |                      |                        |
|                                              | <b>Crude OR</b> | <b>Adjusted OR *</b> | <b>R<sup>2</sup> *</b> |
| Journal Impact Factor (ref: 0-2, n = 5033)   |                 |                      | 0.11                   |
| 2 – 4                                        | 3.4 (2.2 – 5.3) | 2.7 (1.7 – 4.2)      |                        |
| >= 4                                         | 6.0 (4.0 – 9.2) | 4.9 (3.2 – 7.6)      |                        |
| <b>Author characteristics</b>                |                 |                      |                        |
|                                              | <b>Crude OR</b> | <b>Adjusted OR *</b> | <b>R<sup>2</sup> *</b> |
| Gender (female vs male, n = 5392)            | 0.8 (0.6 – 1.0) | 0.7 (0.6 – 1.0)      | 0.09                   |
| Region (ref: Europe)                         |                 |                      | 0.11                   |
| North-America                                | 0.9 (0.6 – 1.3) | 0.9 (0.5 – 1.4)      |                        |
| Asia                                         | 0.3 (0.1 – 0.6) | 0.2 (0.1 – 0.4)      |                        |
| Australia / New-Zealand                      | 0.5 (0.3 – 0.8) | 0.5 (0.3 – 0.8)      |                        |
| Type of Affiliation (other vs university)    | 2.3 (1.8 – 2.9) | 2.0 (1.5 – 2.5)      | 0.10                   |
| <b>Citation characteristics</b>              |                 |                      |                        |
|                                              | <b>Crude OR</b> | <b>Adjusted OR *</b> | <b>R<sup>2</sup> *</b> |
| Authority (ref: low)                         |                 |                      | 0.11                   |
| medium                                       | 2.4 (1.8 – 3.3) | 1.8 (1.3 – 2.5)      |                        |
| high                                         | 3.7 (2.8 – 4.8) | 2.7 (2.0 – 3.7)      |                        |

\* adjusted for study design. **supportive:** supportive for Strachan's original hygiene hypothesis, i.e. inverse association between siblings/infections and allergy. **non-supportive:** no association or positive association between siblings/infections and allergy. **N:** number of publications. **n:** number of potential citation paths.

**Table 3. Concordance odds ratios (95% CI's) for the chance of being cited, all types of articles included, N = 110, n = 5551)**

| <b>Content-related</b>                       | <b>Crude OR</b> | <b>Adjusted OR *</b> | <b>R<sup>2</sup> *</b> |
|----------------------------------------------|-----------------|----------------------|------------------------|
| Type of Exposure (conc. vs. not)             | 10 (5.6 – 18)   | 13 (7.1 – 23)        | 0.14                   |
| Study Outcome (conc. vs. not, n = 1799)**    | 2.9 (1.4 – 6.0) | 3.4 (1.6 – 7.1)      | 0.06                   |
| <b>Not content-related</b>                   | <b>Crude OR</b> | <b>Adjusted OR *</b> | <b>R<sup>2</sup> *</b> |
| Article Type (conc. vs. not)                 | 1.1 (0.9 – 1.3) |                      | 0.00 (crude)           |
| Funding Source (conc. vs. not, n = 1475)***  | 1.3 (0.8 – 1.9) | 1.2 (0.8 – 1.8)      | 0.05                   |
| Publisher (conc. vs. not, n = 4971)****      | 0.9 (0.7 – 1.2) | 0.9 (0.7 – 1.2)      | 0.08                   |
| Author Affiliation (conc. vs. not)           | 0.7 (0.6 – 0.9) | 0.8 (0.7 – 1.0)      | 0.08                   |
| Author Gender (conc. vs. not, n = 5254)***** | 1.0 (0.8 – 1.3) | 1.0 (0.8 – 1.3)      | 0.08                   |
| Author Region (conc. vs. not)                | 1.9 (1.6 – 2.4) | 2.0 (1.6 – 2.5)      | 0.09                   |
| Self-citation (yes vs no)                    | 6.1 (3.8 – 9.7) | 6.1 (3.7 – 9.9)      | 0.09                   |

\* adjusted for study design of cited publication; \*\* publications with mixed results excluded from analysis; \*\*\* publications without reported funding source excluded from analysis; \*\*\*\* Three main publishers are differentiated: Wiley-Blackwell, BMJ, and Elsevier. Either the cited or the citing publication should be in one of these categories to be included in the analysis. \*\*\*\*\* publications with unclear author's gender excluded from analysis; N: number of publication. n: number of potential citation paths.

## Supplement

**Text S1.** Protocol deviations

**Text S2.** Data extraction

**Text S3.** References of included literature on Strachan's hygiene hypothesis

**Table S1.** All characteristics of the publications in the hygiene hypothesis network.

**Table S2.** Top 6 of articles and authors within network.

**Table S3.** Odds ratios for the chance of *empirical* publications to be cited within full network.

**Table S4.** Odds ratios for the chance of *empirical* publications to be cited by *synthesis* publications.

**Table S5.** Sensitivity analyses on odds ratios for the chance of being cited, without the four most cited publications.

**Table S6.** Sensitivity analyses on odds ratios for the chance of being cited, with a 1-year time lag between cited and citing publication.

**Table S7.** Sensitivity analyses on odds ratios for the chance of being cited, without citing publications with less than 10 potential citation paths.

1  
2  
3  
4  
5  
6  
7  
8  
9  
10  
11  
12  
13  
14  
15  
16  
17  
18  
19  
20  
21  
22  
23  
24  
25  
26  
27  
28  
29  
30  
31  
32  
33  
34  
35  
36  
37  
38  
39  
40  
41  
42  
43  
44  
45  
46  
47  
48  
49  
50  
51  
52  
53  
54  
55  
56  
57  
58  
59  
60

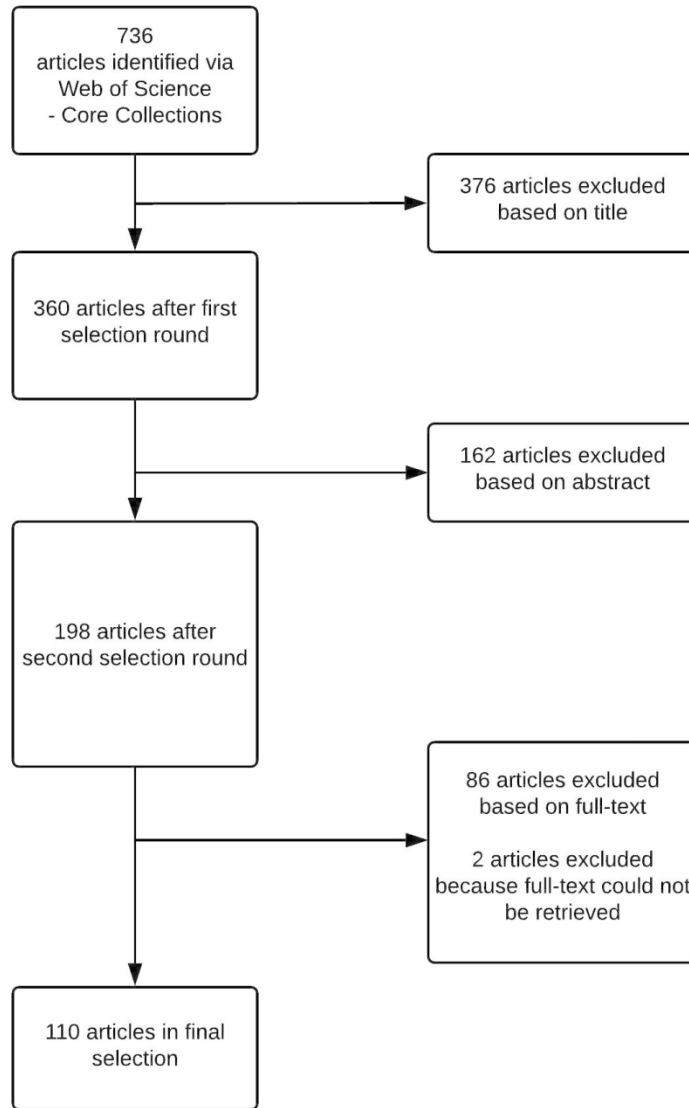

Figure 1. Flow diagram of article selection process.

101x155mm (300 x 300 DPI)

1  
2  
3 **Selective citation in the literature on**  
4  
5 **the hygiene hypothesis**  
6  
7  
8  
9

10  
11  
12 **Supplement**  
13  
14  
15  
16  
17  
18

19 **Text S1.** Protocol deviations

20  
21 **Text S2.** Data extraction

22  
23  
24 **Text S3.** References of included literature on Strachan's hygiene hypothesis

25  
26  
27  
28 **Table S1.** All characteristics of the publications in the hygiene hypothesis network.

29  
30 **Table S2.** Top 6 of articles and authors within network.

31  
32 **Table S3.** Odds ratios for the chance of *empirical* publications to be cited within full network.

33  
34  
35 **Table S4.** Odds ratios for the chance of *empirical* publications to be cited by *synthesis*  
36 publications.

37  
38  
39 **Table S5.** Sensitivity analyses on odds ratios for the chance of being cited, without the four  
40 most cited publications.

41  
42 **Table S6.** Sensitivity analyses on odds ratios for the chance of being cited, with a 1-year time  
43 lag between cited and citing publication.

44  
45  
46 **Table S7.** Sensitivity analyses on odds ratios for the chance of being cited, without citing  
47 publications with less than 10 potential citation paths.  
48  
49  
50  
51  
52  
53  
54  
55  
56  
57  
58  
59  
60

### Text S1. Protocol deviations

*Search strategy.* We ran some checks of our original search strategy (with ‘*hygiene hypothesis*’ in combination with the pre-specified health outcomes). These checks indicated that many relevant publications in the period 1990 – 2000 were missed. Going through these missed publications we found out that the name for this hygiene hypothesis was not yet accepted or used. Also, we realised that almost all relevant publications within this network referred to Strachan’s original study from 1989. We decided to change the search strategy, into *all publications referring to Strachan’s original article*. Additionally, we limited the output to those publications that mentioned ‘rhinitis’ or a similar term in the title, abstract or keywords (see inclusion criteria).

*Inclusion criteria* (regarding the health outcome and types of exposure). Originally, all publications with either health outcome *rhinitis* or *asthma* were to be included. This yielded too many publications in our network, hence we decided to include only publications on rhinitis (or hay fever, or rhinoconjunctivitis). Inclusion solely based on asthma would also have yielded a network that was too large. Also, rhinitis is the original outcome as studied by Strachan. Similarly, we included only publications with exposures *number of siblings* and *infection history*. These are the two most important types of exposure related to the hygiene hypothesis as originally stated by Strachan. Number of siblings was originally studied by Strachan, and infections during childhood (or during pregnancy) was his explanation for the relationship between number of siblings and hay fever.

*Types of health outcome.* We intended to score both *asthma* and *rhinitis* as health outcomes. However, as we included only publications that studied the relationship with rhinitis, and excluded publications that were solely on asthma, we decided to focus on rhinitis. Thus, for the

1  
2  
3 empirical publications, we scored the relationships Siblings – Rhinitis and Infections – Rhinitis.  
4  
5 (We also scored asthma, dermatitis and atopic sensitisation, but only for the sensitivity  
6  
7 analyses.) Synthesis publications often did not differentiate between the different allergies in  
8  
9 their general conclusion, so for the synthesis publications we scored statements on Siblings –  
10  
11 Allergy and Infection – Allergy.  
12  
13  
14  
15  
16

17 *Types of exposure.* We focused on two exposures: *number of siblings* (or household size or  
18  
19 sibling order) and *history of infections* (as assessed by parental questionnaire, serology or  
20  
21 medical records). We used this variable also in our analyses; it was scored as a) number of  
22  
23 siblings only, b) only infection history, and c) both number of siblings and infection history.  
24  
25  
26  
27

28 *Study outcome scoring strategy.* There were many empirical publications with contradictory  
29  
30 results, especially in the case of Infections where the results seemed to depend on the type of  
31  
32 infection. In order to deal with this, we decided to use the *authors' conclusion* on Siblings –  
33  
34 Rhinitis and Infections – Rhinitis as leading. We used 5 categories: 0. not measured or reported;  
35  
36 1. effect in line with hygiene hypothesis (inverse relationship); 2. no relationship; 3. effect  
37  
38 contrary to hygiene hypothesis (positive relationship); 4. mixed or unclear results. Synthesis  
39  
40 publications were scored in a similar way, but then on Siblings – Allergy and Infections –  
41  
42 Allergy.  
43  
44  
45  
46

47 If no clear authors' conclusion was stated in the empirical publications, we used the data  
48  
49 that were presented in the tables or the text and scored as follows: 1. statistically significant  
50  
51 inverse relationship; 2. no statistically significant relationship; 3. statistically significant positive  
52  
53 relationship; 4. mixed or unclear results. If both adjusted analyses and crude analyses were  
54  
55 presented we preferred the adjusted ones. There is one exception: adjustment for Infections in  
56  
57  
58  
59  
60

1  
2  
3 the relationship Siblings – Rhinitis; after all, the hygiene hypothesis states that infection is the  
4 mediator between siblings and rhinitis.  
5  
6

7  
8 In the analyses we used one combined measure for study outcome, with three levels: 1)  
9 supportive; 2) mixed results / unclear; 3) non-supportive. Publications were scored as supportive  
10 if the exposure or exposures showed an inverse association with rhinitis. Publications were  
11 scored as non-supportive if there was no association or a positive association of the exposure  
12 with rhinitis. Publications were scored as mixed if the exposure or exposures showed mixed or  
13 unclear results, or if two exposures were investigated, and one showed an inverse association  
14 and the other showed no or a positive association.  
15  
16  
17  
18  
19  
20  
21  
22  
23  
24  
25

26 *General conclusion about the hygiene hypothesis.* While studying the literature on the hygiene  
27 hypothesis we realised that many related hypotheses reside under this name, all evolved from  
28 one another. *The* hygiene hypothesis clearly does not exist. Support for one version of the  
29 hypothesis often implied the refutation of another (older) version. As authors assumed different  
30 versions, their general conclusion on the hygiene hypothesis would not be compatible. We  
31 decided to not score this general conclusion.  
32  
33  
34  
35  
36  
37  
38  
39  
40  
41

42 *Specificity.* We used 3 outcome categories for publication's specificity instead of 5.  
43  
44  
45  
46

47 *Study design.* Ecological studies were excluded from the network. Cohort studies were further  
48 classified as retrospective and prospective cohort studies. This latter step was data-driven  
49 because we realised during the analysis that prospective cohort studies were cited less often.  
50 During exploration of the data, we noticed a big different in the citation behaviour of  
51 retrospective and prospective cohorts studies. We therefore decided to amend our preregistered  
52 data analysis plan (<http://hdl.handle.net/10411/ZKGGOG>). We differentiated between these  
53  
54  
55  
56  
57  
58  
59  
60



1  
2  
3 research designs (by assigning them a different categorical value), and take this difference into  
4  
5 account in our analyses with study design as determinant or as covariate.  
6  
7

8  
9  
10 *Publisher.* In addition to the protocol we also scored the publisher of the journal, based on the  
11  
12 information in Journal Citation Reports and in Web of Science. This could be interesting for  
13  
14 publisher self-citation concordance analysis.  
15  
16

17  
18  
19 *Explained variance.* In addition to the original analysis plan in the protocol, we also calculated  
20  
21 the explained variance of the adjusted models, so that these models are easier to compare. For  
22  
23 this purpose we calculated McFadden's  $R^2$  by the following formula:  $R^2 = 1 - LL_M/LL_0$  in  
24  
25 which  $LL_M$  stands for the log likelihood of the current regression model and  $LL_0$  stands for the  
26  
27 log likelihood of the empty random-regression model. Both the current and the empty model  
28  
29 (without predictors) were nested under the citing publication. Because of missing values for  
30  
31 certain determinants (such as sample size), some models could be tested only on a sub-selection  
32  
33 of citation paths. If this was the case, then  $LL_0$  was calculated on the same sub-selection of  
34  
35 citation paths.  
36  
37  
38  
39  
40  
41  
42  
43  
44  
45  
46  
47  
48  
49  
50  
51  
52  
53  
54  
55  
56  
57  
58  
59  
60

## Text S2. Data extraction

Most variables are described in the main document. Here follows some additional information for some of the variables.

**Study outcome** was scored as follows: 1. supportive of the hygiene hypothesis; 2. mixed or unclear results; 3. non-supportive of the hygiene hypothesis. An inverse relationship between past exposure and rhinitis is considered to be supportive for the hygiene hypothesis, while a neutral or positive relationship was scored as non-supportive. The scoring was based on the authors' interpretation of the results, as it was stated in the text of the publication. If the authors' interpretation was unclear, we scored study outcome based on the direction and statistical significance of the data. Non-empirical publications seldom distinguished between allergy subtypes, so we used the stated conclusion on general allergy as outcome measure.

Exposure could be either number of siblings (or order of siblings or household size) or history of bacterial or viral infection (as assessed by parental questionnaire, serology, or medical records). If the impact of number of both siblings and infection history was assessed and they were contradicting each other (with one exposure showing inverse association, the other a neutral or positive association), then study outcome was scored as mixed.

**Gender of the corresponding author** was assessed by first name, with help of [www.genderchecker.com](http://www.genderchecker.com); if first name was not given, other articles of the same author were searched, and the profile of the author at the university or at [www.researchgate.com](http://www.researchgate.com) was checked.

**Time to citation** was the number of years between the publication date of the cited publication and the submission date of the citing publication. This variable was not used as determinant of citation, but to determine the dataset of potential citation paths: only citation paths with a positive value for *time to citation* were considered a potential citation, and only potential citations were included in our dataset.

1  
2  
3           As *publication date* we used either the online publication date or the paper publication  
4  
5 date, whichever was first. The average duration from submission to publication was nine months  
6  
7 in this network. For 57 publications the *submission date* was not stated. In these cases, it was  
8  
9 estimated by subtracting nine months from the publication date.  
10  
11  
12  
13  
14  
15  
16  
17  
18  
19  
20  
21  
22  
23  
24  
25  
26  
27  
28  
29  
30  
31  
32  
33  
34  
35  
36  
37  
38  
39  
40  
41  
42  
43  
44  
45  
46  
47  
48  
49  
50  
51  
52  
53  
54  
55  
56  
57  
58  
59  
60

For peer review only

**Text S3. References of included literature on Strachan's hygiene hypothesis**

1. Strachan DP. Epidemiology of hay-fever - towards a community diagnosis. *Clin Exp Allergy*. 1995;25(4):296-303.
2. Strachan D. Socioeconomic factors and the development of allergy. *Toxicol Lett*. 1996;86(2-3):199-203.
3. Strachan DP, Taylor EM, Carpenter RG. Family structure, neonatal infection, and hay fever in adolescence. *Arch Dis Child*. 1996;74(5):422-6.
4. Burr ML, Merrett TG, Dunstan FDJ, Maguire MJ. The development of allergy in high-risk children. *Clin Exp Allergy*. 1997;27(11):1247-53.
5. Butland BK, Strachan DP, Lewis S, Bynner J, Butler N, Britton J. Investigation into the increase in hay fever and eczema at age 16 observed between the 1958 and 1970 British birth cohorts. *Br Med J*. 1997;315(7110):717-21.
6. Jarvis D, Chinn S, Luczynska C, Burney P. The association of family size with atopy and atopic disease. *Clin Exp Allergy*. 1997;27(3):240-5.
7. Matricardi PM, Rosmini F, Ferrigno L, Nisini R, Rapicetta M, Chionne P, et al. Cross sectional retrospective study of prevalence of atopy among Italian military students with antibodies against hepatitis A virus. *Br Med J*. 1997;314(7086):999-1003.
8. Rasanen M, Laitinen T, Kaprio J, Koskenvuo M, Laitinen LA. Hay fever, asthma and number of older siblings - a twin study. *Clin Exp Allergy*. 1997;27(5):515-8.
9. Serafini U. Do infections protect against asthma and atopy? *Allergy*. 1997;52(9):955-7.
10. Strachan DP. Allergy and family size: A riddle worth solving. *Clin Exp Allergy*. 1997;27(3):235-6.
11. Bodner C, Godden D, Seaton A, Aberdeen WG. Family size, childhood infections and atopic diseases. *Thorax*. 1998;53(1):28-32.
12. Farooqi IS, Hopkin JM. Early childhood infection and atopic disorder. *Thorax*. 1998;53(11):927-32.
13. Jones NS, Carney AS, Davis A. The prevalence of allergic rhinosinusitis: A review. *J Laryngol Otol*. 1998;112(11):1019-30.
14. Lewis SA, Britton JR. Consistent effects of high socioeconomic status and low birth order, and the modifying effect of maternal smoking on the risk of allergic disease during childhood. *Respir Med*. 1998;92(10):1237-44.

15. Ponsonby AL, Couper D, Dwyer T, Carmichael A. Cross sectional study of the relation between sibling number and asthma, hay fever, and eczema. *Arch Dis Child*. 1998;79(4):328-33.
16. von Mutius E. The influence of birth order on the expression of atopy in families: A gene-environment interaction? *Clin Exp Allergy*. 1998;28(12):1454-6.
17. Palmer LJ, Valinsky IJ, Pikora T, Zubrick SR, Landau LI. Environmental factors and asthma and allergy in schoolchildren from Western Australia. *Eur Resp J*. 1999;14(6):1351-7.
18. Pekkanen J, Remes S, Kajosaari M, Husman T, Soininen L. Infections in early childhood and risk of atopic disease. *Acta Paediatr*. 1999;88(7):710-4.
19. Ponsonby AL, Couper D, Dwyer T, Carmichael A, Kemp A. Relationship between early life respiratory illness, family size over time, and the development of asthma and hay fever: A seven year follow up study. *Thorax*. 1999;54(8):664-9.
20. Strachan DP. Lifestyle and atopy. *Lancet*. 1999;353(9163):1457-8.
21. Xu B, Jarvelin MR, Pekkanen J. Prenatal factors and occurrence of rhinitis and eczema among offspring. *Allergy*. 1999;54(8):829-36.
22. Matricardi PM, Rosmini F, Riondino S, Fortini M, Ferrigno L, Rapicetta M, et al. Exposure to foodborne and orofecal microbes versus airborne viruses in relation to atopy and allergic asthma: Epidemiological study. *Br Med J*. 2000;320(7232):412-7.
23. Paunio M, Heinonen OP, Virtanen M, Leinikki P, Patja A, Peltola H. Measles history and atopic diseases - a population-based cross-sectional study. *JAMA-J Am Med Assoc*. 2000;283(3):343-6.
24. Seaton A, Devereux G. Diet, infection and wheezy illness: Lessons from adults. *Pediatr Allergy Immunol*. 2000;11:37-40.
25. von Mutius E. The environmental predictors of allergic disease. *J Allergy Clin Immunol*. 2000;105(1):9-19.
26. Yilmaz M, Bingol G, Altintas D, Kendirli SG. Correlation between atopic diseases and tuberculin responses. *Allergy*. 2000;55(7):664-7.
27. Doull IJM. Does pregnancy prevent atopy? *Clin Exp Allergy*. 2001;31(9):1335-7.
28. Johnston SL, Openshaw PJM. The protective effect of childhood infections - the next challenge is to mimic safely this protection against allergy and asthma. *Br Med J*. 2001;322(7283):376-7.
29. Martinez FD. The coming-of-age of the hygiene hypothesis. *Respir Res*. 2001;2(3):129-32.

- 1
- 2
- 3 30. McKeever TM, Lewis SA, Smith C, Collins J, Heatlie H, Frischer M, et al. Siblings,
- 4 multiple births, and the incidence of allergic disease: A birth cohort study using the West
- 5 Midlands General Practice Research Database. *Thorax*. 2001;56(10):758-62.
- 6
- 7
- 8 31. Ring J, Kramer U, Schafer T, Behrendt H. Why are allergies increasing? *Curr Opin*
- 9 *Immunol*. 2001;13(6):701-8.
- 10
- 11 32. von Mutius E. Infection: Friend or foe in the development of atopy and asthma? The
- 12 epidemiological evidence. *Eur Resp J*. 2001;18(5):872-81.
- 13
- 14 33. Crane J. Asthma and allergic diseases: Is there a downside to cleanliness and can we
- 15 exploit it? *Eur J Clin Nutr*. 2002;56:S39-S43.
- 16
- 17 34. Karmaus W, Botezan C. Does a higher number of siblings protect against the
- 18 development of allergy and asthma? A review. *J Epidemiol Community Health*.
- 19 2002;56(3):209-17.
- 20
- 21
- 22 35. Matricardi PM, Rosmini F, Panetta V, Ferrigno L, Bonini S. Hay fever and asthma in
- 23 relation to markers of infection in the United States. *J Allergy Clin Immunol*. 2002;110(3):381-
- 24 7.
- 25
- 26 36. McKeever TM, Lewis SA, Smith C, Collins J, Heatlie H, Frischer M, et al. Early
- 27 exposure to infections and antibiotics and the incidence of allergic disease: A birth cohort study
- 28 with the West Midlands General Practice Research Database. *J Allergy Clin Immunol*.
- 29 2002;109(1):43-50.
- 30
- 31
- 32 37. McKeever TM, Lewis SA, Smith C, Hubbard R. The importance of prenatal exposures
- 33 on the development of allergic disease - a birth cohort study using the West Midlands General
- 34 Practice Database. *Am J Respir Crit Care Med*. 2002;166(6):827-32.
- 35
- 36 38. Svanes C, Jarvis D, Chinn S, Omenaas E, Gulsvik A, Burney P, et al. Early exposure to
- 37 children in family and day care as related to adult asthma and hay fever: Results from the
- 38 European Community Respiratory Health Survey. *Thorax*. 2002;57(11):945-50.
- 39
- 40 39. Cremonini F, Gasbarrini A. Atopy, *Helicobacter pylori* and the hygiene hypothesis. *Eur J*
- 41 *Gastroenterol Hepatol*. 2003;15(6):635-6.
- 42
- 43 40. McCune A, Lane A, Murray L, Harvey I, Nair P, Donovan J, et al. Reduced risk of
- 44 atopic disorders in adults with *Helicobacter pylori* infection. *Eur J Gastroenterol Hepatol*.
- 45 2003;15(6):637-40.
- 46
- 47 41. Prescott SL. Allergy: The price we pay for cleaner living? *Ann Allergy Asthma*
- 48 *Immunol*. 2003;90(6):64-70.
- 49
- 50 42. Gustafsson D, Andersson K. Effect of indoor environmental factors on development of
- 51 atopic symptoms in children followed up to 4 years of age. *Paediatr Perinat Epidemiol*.
- 52 2004;18(1):17-25.
- 53
- 54 43. Jones N. Allergic rhinitis: Aetiology, predisposing and risk factors. *Rhinology*.
- 55 2004;42(2):49-56.
- 56
- 57
- 58
- 59
- 60

- 1  
2  
3  
4 44. Resch A, Schlipkoter U, Crispin A, Behrendt H, Heinrich J, Wichmann HE, et al. Atopic  
5 disease and its determinants - a focus on the potential role of childhood infection. *Clin Exp*  
6 *Allergy*. 2004;34(8):1184-91.  
7
- 8  
9 45. von Hertzen LC, Haahtela T. Asthma and atopy - the price of affluence? *Allergy*.  
10 2004;59(2):124-37.  
11
- 12 46. Borchers AT, Keen CL, Gershwin ME. Hope for the hygiene hypothesis: When the dirt  
13 hits the fan. *J Asthma*. 2005;42(4):225-47.  
14
- 15 47. Bresciani M, Parisi C, Manghi G, Bonini S. The hygiene hypothesis: Does it function  
16 worldwide? *Curr Opin Allergy Clin Immunol*. 2005;5(2):147-51.  
17
- 18 48. Bufford JD, Gem JE. The hygiene hypothesis revisited. *Immunol Allerg Clin North Am*.  
19 2005;25(2):247-+.  
20
- 21 49. de Meer G, Janssen NAH, Brunekreef B. Early childhood environment related to  
22 microbial exposure and the occurrence of atopic disease at school age. *Allergy*. 2005;60(5):619-  
23 25.  
24
- 25 50. Karmaus W, Johnson CC. Invited commentary: Sibship effects and a call for a  
26 comparative disease approach. *Am J Epidemiol*. 2005;162(2):133-8.  
27
- 28 51. Kopp MV, Semmler S, Horst G, Berner R, Forster J. Hospital admission with neonatal  
29 sepsis and development of atopic disease: Is there a link? *Pediatr Allergy Immunol*.  
30 2005;16(8):630-6.  
31
- 32 52. Nafstad P, Brunekreef B, Skrondal A, Nystad W. Early respiratory infections, asthma,  
33 and allergy: 10-year follow-up of the Oslo Birth Cohort. *Pediatrics*. 2005;116(2):E255-E62.  
34
- 35 53. Westergaard T, Rostgaard K, Wohlfahrt J, Andersen PK, Aaby P, Melbye M. Sibship  
36 characteristics and risk of allergic rhinitis and asthma. *Am J Epidemiol*. 2005;162(2):125-32.  
37
- 38 54. Arbes SJ, Sever ML, Vaughn B, Cohen EA, Zeldin DC. Oral pathogens and allergic  
39 disease: Results from the third national health and nutrition examination survey. *J Allergy Clin*  
40 *Immunol*. 2006;118(5):1169-75.  
41
- 42 55. Balemans WAF, Rovers MM, Schilder AGM, Sanders EAM, Kimpen JLL, Zielhuis GA,  
43 et al. Recurrent childhood upper respiratory tract infections do not reduce the risk of adult atopic  
44 disease. *Clin Exp Allergy*. 2006;36(2):198-203.  
45
- 46 56. Bernsen RMD, van der Wouden JC, Nagelkerke NJD, de Jongste JC. Early life  
47 circumstances and atopic disorders in childhood. *Clin Exp Allergy*. 2006;36(7):858-65.  
48
- 49 57. Biagini JM, LeMasters GK, Ryan PH, Levin L, Reponen T, Bernstein DI, et al.  
50 Environmental risk factors of rhinitis in early infancy. *Pediatr Allergy Immunol*.  
51 2006;17(4):278-84.  
52  
53  
54  
55  
56  
57  
58  
59  
60

- 1  
2  
3 58. Friedrich N, Volzke H, Schwahn C, Kramer A, Junger M, Schafer T, et al. Inverse  
4 association between periodontitis and respiratory allergies. *Clin Exp Allergy*. 2006;36(4):495-  
5 502.  
6  
7  
8 59. Kinra S, Smith GD, Jeffreys M, Gunnell D, Galobardes B, McCarron P. Association  
9 between sibship size and allergic diseases in the Glasgow Alumni Study. *Thorax*.  
10 2006;61(1):48-53.  
11  
12 60. Kocabas E, Yapicioglu H, Yildizdas D, Kendirli SG, Burgut R. The prevalence of atopy  
13 in children with antibodies against hepatitis A virus and hepatitis B virus. *Turk J Pediatr*.  
14 2006;48(3):189-96.  
15  
16  
17 61. Paunio M, Peltola H, Virtanen M, Leinikki P, Makela A, Heinonen OP. Acute infections,  
18 infection pressure, and atopy. *Clin Exp Allergy*. 2006;36(5):634-9.  
19  
20  
21 62. Zutavern A, von Klot S, Gehring U, Krauss-Etschmann S, Heinrich J. Pre-natal and post-  
22 natal exposure to respiratory infection and atopic diseases development: A historical cohort  
23 study. *Respir Res*. 2006;7:8.  
24  
25  
26 63. Cakir M, Karakas T, Orhan F, Okten A, Gedik Y. Atopy in children with chronic  
27 hepatitis B virus infection. *Acta Paediatr*. 2007;96(9):1343-6.  
28  
29  
30 64. Cetinkaya F, Uslu HS, Nuhoglu A. Effect of neonatal sepsis on the development of  
31 allergies and asthma in later childhood. *Int Arch Allergy Immunol*. 2007;142(2):145-50.  
32  
33  
34 65. Dunder T, Tapiainen T, Pokka T, Uhari M. Infections in child day care centers and later  
35 development of asthma, allergic rhinitis, and atopic dermatitis - prospective follow-up survey 12  
36 years after controlled randomized hygiene intervention. *Arch Pediatr Adolesc Med*.  
37 2007;161(10):972-7.  
38  
39  
40 66. Harris JM, Mills P, White C, Moffat S, Taylor AJN, Cullinan P. Recorded infections and  
41 antibiotics in early life: Associations with allergy in UK children and their parents. *Thorax*.  
42 2007;62(7):631-7.  
43  
44  
45 67. von Mutius E. Allergies, infections and the hygiene hypothesis - the epidemiological  
46 evidence. *Immunobiology*. 2007;212(6):433-9.  
47  
48  
49 68. Baccioglu A, Kalpaklioglu F, Guliter S, Yakaryilmaz F. *Helicobacter pylori* in allergic  
50 inflammation - fact or fiction? *Allergol Immunopath*. 2008;36(2):85-9.  
51  
52  
53 69. Blaser MJ, Chen Y, Reibman J. Does *Helicobacter pylori* protect against asthma and  
54 allergy? *Gut*. 2008;57(5):561-7.  
55  
56  
57 70. Bremner SA, Carey IM, DeWilde S, Richards N, Maier WC, Hilton SR, et al. Infections  
58 presenting for clinical care in early life and later risk of hay fever in two UK birth cohorts.  
59 *Allergy*. 2008;63(3):274-83.  
60  
61  
62 71. Chen Y, Blaser MJ. *Helicobacter pylori* colonization is inversely associated with  
63 childhood asthma. *J Infect Dis*. 2008;198(4):553-60.



- 1  
2  
3 72. Perzanowski MS, Canfield SM, Chew GL, Mellins RB, Hoepner LA, Jacobson JS, et al.  
4 Birth order, atopy, and symptoms of allergy and asthma among inner-city children attending  
5 head start in New York City. *Clin Exp Allergy*. 2008;38(6):968-76.  
6  
7  
8 73. Ponsonby AL, Kemp A. Investigation of the hygiene hypothesis: Current issues and  
9 future directions. *Allergy*. 2008;63(5):506-8.  
10  
11 74. Svanes C. What has the ecchs told us about the childhood risks of asthma, allergy and  
12 lung function? *Clin Respir J*. 2008;2:34-44.  
13  
14 75. Tanaka K, Miyake Y, Arakawa M, Sasaki S, Ohya Y. Dental caries and allergic  
15 disorders in Japanese children: The Ryukyus Child Health Study. *J Asthma*. 2008;45(9):795-9.  
16  
17 76. Torres-Borrego J, Molina-Teran AB, Montes-Mendoza C. Prevalence and associated  
18 factors of allergic rhinitis and atopic dermatitis in children. *Allergol Immunopath*.  
19 2008;36(2):90-100.  
20  
21 77. Vargas C, Bustos P, Diaz PV, Amigo H, Rona RJ. Childhood environment and atopic  
22 conditions, with emphasis on asthma in a chilean agricultural area. *J Asthma*. 2008;45(1):73-8.  
23  
24 78. Eifan AO, Akkoc T, Ozdemir C, Bahceciler NN, Barlan IB. No association between  
25 tuberculin skin test and atopy in a bacillus Calmette-Guerin vaccinated birth cohort. *Pediatr*  
26 *Allergy Immunol*. 2009;20(6):545-50.  
27  
28 79. Gangal SV, Chowgule R. Infections in early life and susceptibility to allergic diseases:  
29 Relevance of hygiene hypothesis. *Curr Sci*. 2009;96(6):784-93.  
30  
31 80. Kendirli SG, Yilmaz M, Bayram I, Altintas DU, Inal A, Karakoc G. Potential association  
32 between allergic diseases and pertussis infection in schoolchildren: Results of two cross-  
33 sectional studies seven years apart. *Allergol Immunopath*. 2009;37(1):21-5.  
34  
35 81. Kramer MS, Matush L, Bogdanovich N, Dahhou M, Platt RW, Mazer B. The low  
36 prevalence of allergic disease in Eastern Europe. *Clin Exp Allergy*. 2009;39(5):708-16.  
37  
38 82. Matheson MC, Walters EH, Simpson JA, Wharton CL, Ponsonby AL, Johns DP, et al.  
39 Relevance of the hygiene hypothesis to early vs. late onset allergic rhinitis. *Clin Exp Allergy*.  
40 2009;39(3):370-8.  
41  
42 83. Ohfuji S, Miyake Y, Arakawa M, Tanaka K, Sasaki S. Sibship size and prevalence of  
43 allergic disorders in Japan: The Ryukyus Child Health Study. *Pediatr Allergy Immunol*.  
44 2009;20(4):377-84.  
45  
46 84. Bunyavanich S, Soto-Quiros ME, Avila L, Laskey D, Senter JM, Celedon JC. Risk  
47 factors for allergic rhinitis in Costa Rican children with asthma. *Allergy*. 2010;65(2):256-63.  
48  
49 85. Codispoti CD, Levin L, LeMasters GK, Ryan P, Reponen T, Villareal M, et al. Breast-  
50 feeding, aeroallergen sensitization, and environmental exposures during infancy are  
51 determinants of childhood allergic rhinitis. *J Allergy Clin Immunol*. 2010;125(5):1054-60.  
52  
53  
54  
55  
56  
57  
58  
59  
60

- 1  
2  
3 86. Arbes SJ, Matsui EC. Can oral pathogens influence allergic disease? *J Allergy Clin Immunol.* 2011;127(5):1119-27.  
4  
5  
6  
7 87. Liew WK, Lim CWT, Tan TH, Wong KY, Tai BC, Quek SC, et al. The effect of  
8 Kawasaki disease on childhood allergies - a sibling control study. *Pediatr Allergy Immunol.*  
9 2011;22(5):488-93.  
10  
11 88. Matheson MC, Dharmage SC, Abramson MJ, Walters EH, Sunyer J, de Marco R, et al.  
12 Early-life risk factors and incidence of rhinitis: Results from the European community  
13 respiratory health study-an international population-based cohort study. *J Allergy Clin Immunol.*  
14 2011;128(4):816-+.  
15  
16  
17 89. Flohr C, Nagel G, Weinmayr G, Kleiner A, Williams HC, Ait-Khaled N, et al.  
18 Tuberculosis, bacillus Calmette-Guerin vaccination, and allergic disease: Findings from the  
19 International Study of Asthma and Allergies in Childhood Phase Two. *Pediatr Allergy Immunol.*  
20 2012;23(4):324-31.  
21  
22  
23 90. Lee SY, Kwon JW, Seo JH, Song YH, Kim BJ, Yu J, et al. Prevalence of atopy and  
24 allergic diseases in Korean children: Associations with a farming environment and rural  
25 lifestyle. *Int Arch Allergy Immunol.* 2012;158(2):168-74.  
26  
27  
28 91. Lighter-Fisher J, Peng CH. Infection with mycobacterium tuberculosis is inversely  
29 associated with childhood asthma. *Pediatr Allergy Immunol Pulmonol.* 2012;25(2):80-5.  
30  
31  
32 92. Nagel G, Weinmayr G, Flohr C, Kleiner A, Strachan DP, Grp IPTS. Association of  
33 pertussis and measles infections and immunizations with asthma and allergic sensitization in  
34 ISAAC Phase Two. *Pediatr Allergy Immunol.* 2012;23(8):737-46.  
35  
36  
37 93. Schmitz R, Atzpodien K, Schlaud M. Prevalence and risk factors of atopic diseases in  
38 German children and adolescents - a nationwide health report. *Pediatr Allergy Immunol.*  
39 2012;23(8):716-23.  
40  
41  
42 94. Silverberg JI, Kleiman E, Silverberg NB, Durkin HG, Joks R, Smith-Norowitz TA.  
43 Chickenpox in childhood is associated with decreased atopic disorders, IgE, allergic  
44 sensitization, and leukocyte subsets. *Pediatr Allergy Immunol.* 2012;23(1):50-8.  
45  
46  
47 95. Duksal F, Akcay A, Becerir T, Ergin A, Becerir C, Guler N. Rising trend of allergic  
48 rhinitis prevalence among Turkish schoolchildren. *Int J Pediatr Otorhinolaryngol.*  
49 2013;77(9):1434-9.  
50  
51  
52 96. Kondrashova A, Seiskari T, Ilonen J, Knip M, Hyoty H. The 'hygiene hypothesis' and the  
53 sharp gradient in the incidence of autoimmune and allergic diseases between Russian Karelia  
54 and Finland. *Apmis.* 2013;121(6):478-93.  
55  
56  
57 97. Kuo HC, Chang WC, Yang KD, Yu HR, Wang CL, Ho SC, et al. Kawasaki disease and  
58 subsequent risk of allergic diseases: A population-based matched cohort study. *BMC Pediatr.*  
59 2013;13:6.  
60

- 1  
2  
3 98. Prokopakis E, Vardouniotis A, Kawauchi H, Scadding G, Georgalas C, Hellings P, et al.  
4 The pathophysiology of the hygiene hypothesis. *Int J Pediatr Otorhinolaryngol*.  
5 2013;77(7):1065-71.  
6  
7  
8 99. Lionetti E, Leonardi S, Lanzafame A, Garozzo MT, Filippelli M, Tomarchio S, et al.  
9 *Helicobacter pylori* infection and atopic diseases: Is there a relationship? A systematic review  
10 and meta-analysis. *World J Gastroenterol*. 2014;20(46):17635-47.  
11  
12 100. Tantilipikorn P. The relationship between allergic rhinitis and viral infections. *Curr Opin*  
13 *Otolaryngol Head Neck Surg*. 2014;22(3):249-52.  
14  
15 101. Kimura H, Konno S, Isada A, Maeda Y, Musashi M, Nishimura M. Contrasting  
16 associations of body mass index and measles with asthma and rhinitis in young adults. *Allergy*  
17 *Asthma Proc*. 2015;36(4):293-9.  
18  
19 102. Lin CH, Lin WC, Wang YC, Lin IC, Kao CH. Association between neonatal urinary  
20 tract infection and risk of childhood allergic rhinitis. *Medicine (Baltimore)*. 2015;94(38):6.  
21  
22 103. Strachan DP, Ait-Khaled N, Foliaki S, Mallol J, Odhiambo J, Pearce N, et al. Siblings,  
23 asthma, rhinoconjunctivitis and eczema: A worldwide perspective from the international study  
24 of asthma and allergies in childhood. *Clin Exp Allergy*. 2015;45(1):126-36.  
25  
26 104. Han CS. A specific hygiene hypothesis. *Med Hypotheses*. 2016;93:146-9.  
27  
28 105. Indinnimeo L, Porta D, Forastiere F, De Vittori V, De Castro G, Zicari AM, et al.  
29 Prevalence and risk factors for atopic disease in a population of preschool children in Rome:  
30 Challenges to early intervention. *Int J Immunopathol Pharmacol*. 2016;29(2):308-19.  
31  
32 106. Sastra S, Irsa L, Loebis MS, Evalina R. Number of siblings and allergic rhinitis in  
33 children. *Paediatr Indones*. 2016;56(1):1-7.  
34  
35 107. Christiansen ES, Kjaer HF, Eller E, Bindslev-Jensen C, Host A, Mortz CG, et al. Early  
36 childhood risk factors for rhinoconjunctivitis in adolescence: A prospective birth cohort study.  
37 *Clin Transl Allergy*. 2017;7:7.  
38  
39 108. Miftahussurur M, Nusi IA, Graham DY, Yamaoka Y. *Helicobacter*, hygiene, atopy, and  
40 asthma. *Front Microbiol*. 2017;8:11.  
41  
42 109. Wander K, Shell-Duncan B, Brindle E, O'Connor K. Hay fever, asthma, and eczema and  
43 early infectious diseases among children in Kilimanjaro, Tanzania. *Am J Hum Biol*.  
44 2017;29(3):13.  
45  
46 110. Yildizdas HY, Ozcan A, Sertdemir Y, Yilmaz M. Effect of healthcare associated  
47 infections and broad spectrum antibiotic use in newborn period on development of asthma,  
48 allergic rhinitis and atopic dermatitis in early childhood. *Cukurova Med J*. 2017;42(1):132-9.  
49  
50  
51  
52  
53  
54  
55  
56  
57  
58  
59  
60

**Table S1. All characteristics of the publications in the hygiene hypothesis network.**

|                                                          |                            | <b>N publications</b> | <b>n potential citations</b> | <b>n actual citations (%)</b> |
|----------------------------------------------------------|----------------------------|-----------------------|------------------------------|-------------------------------|
| <b>Total</b>                                             |                            | 110                   | 5551                         | 392 (7%)                      |
| <b>Publication characteristics - content-related</b>     | <b>category</b>            | <b>N publications</b> | <b>n potential citations</b> | <b>n actual citations (%)</b> |
| Type of Exposure                                         | only Number of Siblings    | 28                    | 1512                         | 100 (7%)                      |
|                                                          | only Infection History     | 48                    | 1946                         | 144 (7%)                      |
|                                                          | both Siblings & Infections | 34                    | 2093                         | 148 (7%)                      |
| Study Outcome                                            | supportive                 | 41                    | 2322                         | 198 (9%)                      |
| Exposure - Rhinitis                                      | mixed results              | 35                    | 1913                         | 129 (7%)                      |
|                                                          | non-supportive             | 34                    | 1316                         | 65 (5%)                       |
| Publication Type / Study Design                          | Empirical                  | 73                    | 3517                         | 337 (10%)                     |
|                                                          | cross-sectional            | 39                    | 1697                         | 179 (11%)                     |
|                                                          | case-control               | 4                     | 249                          | 36 (14%)                      |
|                                                          | cohort                     | 29                    | 1535                         | 121 (8%)                      |
|                                                          | -retrospective             | 15                    | 817                          | 89 (11%)                      |
|                                                          | -prospective               | 14                    | 718                          | 32 (4%)                       |
|                                                          | intervention               | 1                     | 36                           | 1 (3%)                        |
|                                                          | Synthesis                  | 37                    | 2034                         | 55 (3%)                       |
|                                                          | narrative review           | 27                    | 1423                         | 16 (1%)                       |
|                                                          | systematic review          | 2                     | 80                           | 20 (25%)                      |
|                                                          | -with meta-analysis        | 1                     | 8                            | 1 (13%)                       |
|                                                          | editorial, etc             | 8                     | 531                          | 19 (4%)                       |
| Sample Size<br>(cat; for empirical publications)         | low (1 – 999)              | 24                    | 909                          | 56 (6%)                       |
|                                                          | medium (1000 – 7999)       | 25                    | 1327                         | 143 (11%)                     |
|                                                          | high (>= 8000)             | 24                    | 1281                         | 138 (11%)                     |
| Specificity                                              | 0 (non-specific)           | 27                    | 1402                         | 25 (2%)                       |
|                                                          | 1                          | 39                    | 1657                         | 65 (4%)                       |
|                                                          | 2 (specific)               | 44                    | 2492                         | 302 (12%)                     |
| <b>Publication characteristics - not content-related</b> | <b>category</b>            | <b>N publications</b> | <b>n potential citations</b> | <b>n actual citations (%)</b> |
| Conclusive Title                                         | not conclusive             | 99                    | 5026                         | 375 (7%)                      |
|                                                          | conclusive                 | 11                    | 525                          | 17 (3%)                       |

|                        |                        |    |      |           |
|------------------------|------------------------|----|------|-----------|
| Funding Source         | non-profit             | 44 | 2188 | 214 (10%) |
|                        | for-profit             | 1  | 38   | 1 (3%)    |
|                        | both                   | 12 | 559  | 51 (9%)   |
|                        | not reported / unclear | 53 | 2766 | 126 (5%)  |
| Number of Authors      | 1 - 2                  | 32 | 2017 | 89 (4%)   |
|                        | 3 - 5                  | 41 | 2143 | 155 (7%)  |
|                        | >= 6                   | 37 | 1391 | 148 (11%) |
| Number of Affiliations | 1                      | 36 | 2276 | 111 (5%)  |
|                        | 2                      | 24 | 1168 | 108 (9%)  |
|                        | >= 3                   | 50 | 2107 | 173 (8%)  |
| Number of References   | < 30                   | 35 | 2307 | 194 (8%)  |
|                        | 30 - 50                | 49 | 2060 | 159 (8%)  |
|                        | >= 50                  | 26 | 1184 | 39 (3%)   |

| Journal characteristics     | category        | N publications | n potential citations | n actual citations (%) |
|-----------------------------|-----------------|----------------|-----------------------|------------------------|
| Journal Impact Factor (cat) | 0 - 2           | 28             | 1275                  | 27 (2%)                |
|                             | 2 - 4           | 41             | 2087                  | 145 (7%)               |
|                             | >= 4            | 32             | 1671                  | 176 (11%)              |
| Publisher                   | Wiley-Blackwell | 41             | 2107                  | 82 (4%)                |
|                             | BMJ             | 15             | 1170                  | 213 (18%)              |
|                             | Elsevier        | 18             | 894                   | 43 (5%)                |
|                             | other           | 36             | 1380                  | 54 (4%)                |

| <b>Author characteristics</b>   | <b>category</b>  | <b>N publications</b> | <b>n potential citations</b> | <b>n actual citations (%)</b> |
|---------------------------------|------------------|-----------------------|------------------------------|-------------------------------|
| Gender                          | male             | 65                    | 3368                         | 265 (8%)                      |
|                                 | female           | 42                    | 2024                         | 123 (6%)                      |
|                                 | unclear          | 3                     | 159                          | 4 (3%)                        |
| Affiliation                     | university       | 88                    | 4402                         | 258 (6%)                      |
|                                 | government       | 9                     | 410                          | 22 (5%)                       |
|                                 | industry / other | 13                    | 739                          | 112 (15%)                     |
| Country                         | Europe           | 62                    | 3903                         | 324 (8%)                      |
|                                 | UK               | 26                    | 1946                         | 165 (8%)                      |
|                                 | Germany          | 11                    | 594                          | 19 (3%)                       |
|                                 | Finland          | 8                     | 516                          | 33 (6%)                       |
|                                 | Italy            | 7                     | 418                          | 85 (20%)                      |
|                                 | North-America    | 19                    | 688                          | 38 (6%)                       |
|                                 | USA              | 18                    | 662                          | 36 (5%)                       |
|                                 | Asia             | 21                    | 484                          | 9 (2%)                        |
|                                 | Turkey           | 9                     | 303                          | 7 (2%)                        |
|                                 | Japan            | 4                     | 60                           | 0 (0%)                        |
| Australia / New Zealand         | 8                | 476                   | 21 (4%)                      |                               |
| Australia                       | 7                | 407                   | 21 (5%)                      |                               |
| <b>Citation characteristics</b> | <b>category</b>  |                       | <b>n potential citations</b> | <b>n actual citations (%)</b> |
| Authority                       | low (0-2)        |                       | 2279                         | 81 (4%)                       |
|                                 | medium (2-10)    |                       | 1326                         | 108 (8%)                      |
|                                 | high (>= 10)     |                       | 1946                         | 203 (10%)                     |
| Time to Citation (in years)     | 0 – 1            |                       | 494                          | 38 (8%)                       |
|                                 | 1 – 2            |                       | 521                          | 56 (11%)                      |
|                                 | 2 – 3            |                       | 527                          | 50 (9%)                       |
|                                 | 3 – 4            |                       | 459                          | 33 (7%)                       |
|                                 | 4 – 5            |                       | 456                          | 40 (9%)                       |
|                                 | 5 – 6            |                       | 441                          | 35 (8%)                       |
|                                 | 6 – 7            |                       | 404                          | 28 (7%)                       |
|                                 | 7 – 8            |                       | 372                          | 22 (6%)                       |
|                                 | => 8             |                       | 1877                         | 90 (5%)                       |
| Self-citation                   | no               |                       | 5462                         | 365 (7%)                      |
|                                 | yes              |                       | 89                           | 27 (30%)                      |

**Table S2. Top 6 of articles (above) and authors (below) within network, based on the number of received citations up to 2017.**

| Article rank | Article's first author | Title                                                                                                                                | Year | Nr. of received citations (% of potential citations) |
|--------------|------------------------|--------------------------------------------------------------------------------------------------------------------------------------|------|------------------------------------------------------|
| 1            | Matricardi             | Cross sectional retrospective study of prevalence of atopy among Italian military students with antibodies against hepatitis A virus | 1997 | 35 (35 %)                                            |
| 2            | Bodner                 | Family size, childhood infections and atopic diseases                                                                                | 1998 | 32 (33 %)                                            |
| 3            | Matricardi             | Exposure to foodborne and orofecal microbes versus airborne viruses in relation to atopy and allergic asthma: epidemiological study  | 2000 | 32 (38 %)                                            |
| 4            | Strachan               | Family structure, neonatal infection, and hay fever in adolescence                                                                   | 1996 | 28 (26 %)                                            |
| 5            | Farooqi                | Early childhood infection and atopic disorder                                                                                        | 1998 | 21 (23 %)                                            |
| 6            | Karmaus                | Does a higher number of siblings protect against the development of allergy and asthma? A review                                     | 2002 | 19 (26 %)                                            |

  

| Author rank | Author        | Affiliation                              | Country        | Nr. of received citations (= authority) |
|-------------|---------------|------------------------------------------|----------------|-----------------------------------------|
| 1           | P. Matricardi | Consiglio Nazionale delle Ricerche, Rome | Italy          | 84                                      |
| 2           | F. Rosmini    | Istituto Superiore di Sanita, Rome       | Italy          | 84                                      |
| 3           | L. Ferrigno   | Istituto Superiore di Sanita, Rome       | Italy          | 84                                      |
| 4           | M. Rapicetta  | Istituto Superiore di Sanita, Rome       | Italy          | 67                                      |
| 5           | D. Strachan   | University of London, London             | United Kingdom | 57                                      |
| 6           | S. Bonini     | Consiglio Nazionale delle Ricerche, Rome | Italy          | 49                                      |

**Table S3. Odds ratios (95% CIs) for the chance of *empirical* publications to be cited within full network (N = 73, n = 3517).**

| <b>Publication characteristics,</b>                |                 |                      |                        |
|----------------------------------------------------|-----------------|----------------------|------------------------|
| <b>content-related</b>                             | <b>Crude OR</b> | <b>Adjusted OR *</b> | <b>R<sup>2</sup> *</b> |
| Type of Exposure (ref: both Siblings & Infections) |                 |                      | 0.04                   |
| only Number of Siblings                            | 0.5 (0.3 – 0.6) | 0.4 (0.3 – 0.5)      |                        |
| only Infection History                             | 1.0 (0.8 – 1.3) | 0.7 (0.5 – 0.9)      |                        |
| Study Outcome (ref: non-supportive results) **     |                 |                      | 0.07                   |
| mixed / unclear results                            | 1.4 (0.9 – 2.3) | 1.1 (0.7 – 1.9)      |                        |
| supportive results                                 | 4.8 (3.2 – 7.0) | 5.1 (3.3 – 7.8)      |                        |
| <b>Publication characteristics,</b>                |                 |                      |                        |
| <b>other content-related</b>                       | <b>Crude OR</b> | <b>Adjusted OR *</b> | <b>R<sup>2</sup> *</b> |
| Study Design (ref: cross-sectional)                |                 |                      | 0.02 (crude)           |
| case control                                       | 1.4 (0.9 – 2.2) |                      |                        |
| retrospective cohort                               | 0.9 (0.7 – 1.2) |                      |                        |
| prospective cohort                                 | 0.3 (0.2 – 0.5) |                      |                        |
| Sample Size (ref: low)                             |                 | ***                  | 0.02                   |
| medium                                             | 1.6 (1.2 – 2.3) | 1.6 (1.0 – 2.6)      |                        |
| high                                               | 1.6 (1.2 – 2.3) | 1.9 (1.2 – 3.0)      |                        |
| Specificity (ref: low)                             |                 |                      | 0.05                   |
| medium                                             | 4.6 (2.6 – 8.2) | 3.5 (1.8 – 6.5)      |                        |
| high                                               | 7.4 (4.5 – 12)  | 6.1 (3.5 – 10)       |                        |
| <b>Publication characteristics,</b>                |                 |                      |                        |
| <b>not content-related</b>                         | <b>Crude OR</b> | <b>Adjusted OR *</b> | <b>R<sup>2</sup> *</b> |
| Conclusive Title (yes vs no)                       | 0.3 (0.2 – 0.6) | 0.3 (0.1 – 0.5)      | 0.03                   |
| Funding Source (ref: exclusively non-profit)       |                 |                      | 0.02                   |
| profit or both profit/non-profit                   | 0.9 (0.6 – 1.2) | 0.8 (0.5 – 1.1)      |                        |
| not reported                                       | 0.8 (0.6 – 1.1) | 0.8 (0.6 – 1.1)      |                        |
| Number of Authors (ref: 1-2)                       |                 |                      | 0.03                   |
| 3 - 5                                              | 1.1 (0.7 – 1.6) | 1.2 (0.7 – 1.8)      |                        |
| >= 6                                               | 1.7 (1.2 – 2.6) | 1.8 (1.1 – 2.9)      |                        |
| Number of Affiliations (ref: 1)                    |                 |                      | 0.03                   |
| 2                                                  | 1.7 (1.2 – 2.4) | 1.8 (1.2 – 2.6)      |                        |
| >= 3                                               | 1.3 (0.9 – 1.7) | 1.6 (1.2 – 2.4)      |                        |
| Number of References (ref: <30)                    |                 |                      | 0.02                   |
| 30 - 50                                            | 0.9 (0.7 – 1.1) | 1.0 (0.7 – 1.2)      |                        |
| >= 50                                              | 0.3 (0.1 – 0.7) | 0.3 (0.1 – 0.8)      |                        |



| <b>Journal characteristics</b>             | <b>Crude OR</b> | <b>Adjusted OR *</b> | <b>R<sup>2</sup> *</b> |
|--------------------------------------------|-----------------|----------------------|------------------------|
| Journal Impact Factor (ref: 0-2, n = 3266) |                 |                      | 0.06                   |
| 2 – 4                                      | 2.8 (1.7 – 4.5) | 2.6 (1.6 – 4.3)      |                        |
| >= 4                                       | 5.9 (3.7 – 9.5) | 6.6 (4.0 – 11)       |                        |
| <b>Author characteristics</b>              | <b>Crude OR</b> | <b>Adjusted OR *</b> | <b>R<sup>2</sup> *</b> |
| Gender (female vs male, n = 3457)          | 0.6 (0.5 – 0.8) | 0.7 (0.5 – 0.9)      | 0.03                   |
| Region (ref: Europe)                       |                 |                      | 0.04                   |
| North-America                              | 0.5 (0.3–0.97)  | 0.6 (0.3 – 1.1)      |                        |
| Asia                                       | 0.2 (0.1 – 0.4) | 0.1 (0.1 – 0.3)      |                        |
| Australia / New-Zealand                    | 0.5 (0.3 – 0.8) | 0.5 (0.3 – 0.9)      |                        |
| Type of Affiliation (other vs university)  | 2.4 (1.9 – 3.2) | 2.2 (1.7 – 2.9)      | 0.04                   |
| <b>Citation characteristics</b>            | <b>Crude OR</b> | <b>Adjusted OR *</b> | <b>R<sup>2</sup> *</b> |
| Authority (ref: low)                       |                 |                      | 0.05                   |
| medium                                     | 2.0 (1.4 – 3.0) | 2.1 (1.4 – 3.0)      |                        |
| high                                       | 3.6 (2.6 – 5.1) | 3.8 (2.7 – 5.5)      |                        |

\* adjusted for study design and log sample size. \*\* both the ‘crude’ and adjusted analyses are (additionally) adjusted for type of exposure. \*\*\* only adjusted for study design. **supportive:** supportive for Strachan’s original hygiene hypothesis, i.e. inverse association between siblings/infections and allergy. **non-supportive:** no association or positive association between siblings/infections and allergy. N = number of potentially cited publications; n = number of potential citation paths.

**Table S4. Odds ratios (95% CIs) for the chance of *empirical* publications to be cited by *synthesis* publications (N = 73, n = 1097).**

| <b>Publication characteristics,</b>                |                 |                      |                        |
|----------------------------------------------------|-----------------|----------------------|------------------------|
| <b>content-related</b>                             | <b>Crude OR</b> | <b>Adjusted OR *</b> | <b>R<sup>2</sup> *</b> |
| Type of Exposure (ref: both Siblings & Infections) |                 |                      | 0.07                   |
| only Number of Siblings                            | 0.4 (0.2 – 0.7) | 0.3 (0.2 – 0.6)      |                        |
| only Infection History                             | 1.8 (1.1 – 3.0) | 1.3 (0.7 – 2.3)      |                        |
| Study Outcome (ref: non-supportive results) **     |                 |                      | 0.12                   |
| mixed / unclear results                            | 0.5 (0.2 – 1.0) | 0.4 (0.2 – 0.9)      |                        |
| supportive results                                 | 6.0 (3.1 – 12)  | 7.3 (3.5 – 15)       |                        |
| <b>Publication characteristics,</b>                |                 |                      |                        |
| <b>other content-related</b>                       | <b>Crude OR</b> | <b>Adjusted OR *</b> | <b>R<sup>2</sup> *</b> |
| Study Design (ref: cross-sectional)                |                 |                      | 0.04 (crude)           |
| case control                                       | 2.1 (1.1 – 4.2) |                      |                        |
| retrospective cohort                               | 1.0 (0.6 – 1.6) |                      |                        |
| prospective cohort                                 | 0.3 (0.1 – 0.6) |                      |                        |
| Sample Size (ref: low)                             |                 | ***                  | 0.04                   |
| medium                                             | 1.6 (0.9 – 2.8) | 1.9 (0.8 – 4.6)      |                        |
| high                                               | 1.3 (0.7 – 2.3) | 1.9 (0.8 – 4.4)      |                        |
| Specificity (ref: low)                             |                 |                      | 0.06                   |
| medium                                             | 6.9 (2.8 – 17)  | 4.3 (1.6 – 12)       |                        |
| high                                               | 7.6 (3.4 – 17)  | 5.6 (2.3 – 13)       |                        |
| <b>Publication characteristics,</b>                |                 |                      |                        |
| <b>not content-related</b>                         | <b>Crude OR</b> | <b>Adjusted OR *</b> | <b>R<sup>2</sup> *</b> |
| Conclusive Title (yes vs no)                       | 0.4 (0.2 – 0.9) | 0.2 (0.1 – 0.6)      | 0.05                   |
| Funding Source (ref: exclusively non-profit)       |                 |                      | 0.04                   |
| profit or both profit/non-profit                   | 0.7 (0.4 – 1.2) | 0.7 (0.4 – 1.3)      |                        |
| not reported                                       | 0.6 (0.4 – 1.0) | 0.5 (0.3 – 0.9)      |                        |
| Number of Authors (ref: 1-2)                       |                 |                      | 0.06                   |
| 3 - 5                                              | 0.6 (0.3 – 1.1) | 0.6 (0.3 – 1.2)      |                        |
| >= 6                                               | 1.5 (0.8 – 2.8) | 1.5 (0.7 – 3.2)      |                        |
| Number of Affiliations (ref: 1)                    |                 |                      | 0.04                   |
| 2                                                  | 1.3 (0.7 – 2.4) | 1.6 (0.8 – 3.1)      |                        |
| >= 3                                               | 1.2 (0.7 – 2.0) | 2.0 (1.1 – 3.6)      |                        |
| Number of References (ref: <30)                    |                 |                      | 0.04                   |
| 30 - 50                                            | 0.7 (0.5 – 1.1) | 0.8 (0.5 – 1.2)      |                        |
| >= 50                                              | 0.2 (0.04–0.9)  | 0.2 (0.04–1.0)       |                        |

| <b>Journal characteristics</b>             | <b>Crude OR</b> | <b>Adjusted OR *</b> | <b>R<sup>2</sup> *</b> |
|--------------------------------------------|-----------------|----------------------|------------------------|
| Journal Impact Factor (ref: 0-2, n = 1015) |                 |                      | 0.11                   |
| 2 – 4                                      | 2.6 (1.2 – 5.6) | 2.2 (1.0 – 4.9)      |                        |
| >= 4                                       | 8.2 (3.8 – 18)  | 9.2 (4.1 – 21)       |                        |
| <b>Author characteristics</b>              | <b>Crude OR</b> | <b>Adjusted OR *</b> | <b>R<sup>2</sup> *</b> |
| Gender (female vs male, n = 1079)          | 0.5 (0.3 – 0.8) | 0.6 (0.4 – 0.9)      | 0.04                   |
| Region (ref: Europe)                       |                 |                      | 0.07                   |
| North-America                              | 0.7 (0.2 – 2.2) | 0.9 (0.3 – 2.9)      |                        |
| Asia                                       | 0.2 (0.1 – 0.7) | 0.1 (0.02–0.3)       |                        |
| Australia / New-Zealand                    | 0.2 (0.1 – 0.6) | 0.2 (0.9 – 0.7)      |                        |
| Type of Affiliation (other vs university)  | 3.3 (2.2 – 5.1) | 3.1 (2.0 – 4.8)      | 0.07                   |
| <b>Citation characteristics</b>            | <b>Crude OR</b> | <b>Adjusted OR *</b> | <b>R<sup>2</sup> *</b> |
| Authority (ref: low)                       |                 |                      | 0.07                   |
| medium                                     | 2.6 (1.4 – 4.6) | 2.7 (1.4 – 5.1)      |                        |
| high                                       | 4.0 (2.3 – 7.1) | 4.1 (2.2 – 7.6)      |                        |

\* adjusted for study design and log sample size. \*\* both the 'crude' and adjusted analyses are (additionally) adjusted for type of exposure. \*\*\* only adjusted for study design. **supportive:** supportive for Strachan's original hygiene hypothesis, i.e. inverse association between siblings/infections and allergy. **non-supportive:** no association or positive association between siblings/infections and allergy. N = number of potentially cited (*empirical*) publications; n = number of potential citation paths.

**Table S5. Sensitivity analyses on odds ratios (95% CIs) for the chance of being cited within full network, without the four most cited publications. N = 106, n = 5164).**

| <b>Publication characteristics,</b>                |                 |                      |                        |
|----------------------------------------------------|-----------------|----------------------|------------------------|
| <b>content-related</b>                             | <b>Crude OR</b> | <b>Adjusted OR *</b> | <b>R<sup>2</sup> *</b> |
| Type of Exposure (ref: both Siblings & Infections) |                 |                      | 0.08                   |
| only Number of Siblings                            | 1.4 (1.0 – 1.9) | 0.9 (0.6 – 1.3)      |                        |
| only Infection History                             | 1.0 (0.8 – 1.4) | 1.0 (0.7 – 1.4)      |                        |
| Study Outcome (ref: non-supportive results) **     |                 |                      | 0.08                   |
| mixed / unclear results                            | 0.8 (0.5 – 1.1) | 1.2 (0.8 – 2.0)      |                        |
| supportive results                                 | 1.0 (0.7 – 1.5) | 1.5 (1.0 – 2.2)      |                        |
| <b>Publication characteristics,</b>                |                 |                      |                        |
| <b>other content-related</b>                       | <b>Crude OR</b> | <b>Adjusted OR *</b> | <b>R<sup>2</sup> *</b> |
| Publication Type (empirical vs synthesis)          | 2.9 (2.1 – 3.9) |                      | 0.03 (crude)           |
| Study Design (ref: cross-sectional)                |                 |                      | 0.08 (crude)           |
| case control                                       | 0.3 (0.1 – 0.8) |                      |                        |
| retrospective cohort                               | 1.1 (0.8 – 1.5) |                      |                        |
| prospective cohort                                 | 0.5 (0.3 – 0.8) |                      |                        |
| narrative review                                   | 0.1 (0.1 – 0.2) |                      |                        |
| systematic review                                  | 4.5 (2.5 – 8.0) |                      |                        |
| editorial / other                                  | 0.4 (0.2 – 0.7) |                      |                        |
| Sample Size (ref: low, n = 3130)                   |                 | ***                  | 0.02                   |
| medium                                             | 2.3 (1.4 – 3.7) | 1.6 (0.9 – 2.9)      |                        |
| high                                               | 3.3 (2.1 – 5.3) | 2.5 (1.5 – 4.2)      |                        |
| Specificity (ref: low)                             |                 |                      | 0.09                   |
| medium                                             | 2.4 (1.5 – 3.9) | 3.3 (1.9 – 5.6)      |                        |
| high                                               | 5.6 (3.6 – 8.7) | 3.5 (2.1 – 5.6)      |                        |
| <b>Publication characteristics,</b>                |                 |                      |                        |
| <b>not content-related</b>                         | <b>Crude OR</b> | <b>Adjusted OR *</b> | <b>R<sup>2</sup> *</b> |
| Conclusive Title (yes vs no)                       | 0.6 (0.4 – 1.0) | 0.5 (0.3 – 0.9)      | 0.08                   |
| Funding Source (ref: exclusively non-profit)       |                 |                      | 0.08                   |
| profit or both profit/non-profit                   | 1.4 (1.0 – 2.0) | 1.4 (0.9 – 2.0)      |                        |
| not reported                                       | 0.5 (0.4 – 0.7) | 1.0 (0.7 – 1.4)      |                        |
| Number of Authors (ref: 1-2)                       |                 |                      | 0.08                   |
| 3 - 5                                              | 1.2 (0.9 – 1.7) | 0.7 (0.5 – 1.1)      |                        |
| >= 6                                               | 2.0 (1.4 – 2.8) | 0.9 (0.6 – 1.4)      |                        |
| Number of Affiliations (ref: 1)                    |                 |                      | 0.08                   |
| 2                                                  | 1.8 (1.3 – 2.5) | 1.1 (0.8 – 1.6)      |                        |
| >= 3                                               | 1.0 (0.7 – 1.4) | 0.6 (0.4 – 0.9)      |                        |

|                                            |                 |                 |      |
|--------------------------------------------|-----------------|-----------------|------|
| Number of References (ref: <30)            |                 |                 | 0.08 |
| 30 - 50                                    | 0.9 (0.7 – 1.2) | 0.7 (0.6 – 1.0) |      |
| >= 50                                      | 0.6 (0.4 – 0.8) | 0.8 (0.5 – 1.3) |      |
| <b>Journal characteristics</b>             |                 |                 |      |
| Journal Impact Factor (ref: 0-2, n = 4752) |                 |                 | 0.09 |
| 2 – 4                                      | 2.8 (1.8 – 4.3) | 2.5 (1.6 – 3.9) |      |
| >= 4                                       | 4.0 (2.6 – 6.1) | 3.5 (2.2 – 5.5) |      |
| <b>Author characteristics</b>              |                 |                 |      |
| Gender (female vs male, n = 5005)          |                 |                 | 0.07 |
| Region (ref: Europe)                       |                 |                 | 0.08 |
| North-America                              | 1.2 (0.8 – 1.8) | 1.0 (0.6 – 1.6) |      |
| Asia                                       | 0.4 (0.2 – 0.8) | 0.4 (0.2 – 0.8) |      |
| Australia / New-Zealand                    | 0.8 (0.5 – 1.2) | 0.7 (0.5 – 1.2) |      |
| Type of Affiliation (other vs university)  |                 |                 | 0.08 |
| <b>Citation characteristics</b>            |                 |                 |      |
| Authority (ref: low)                       |                 |                 | 0.08 |
| medium                                     | 2.1 (1.5 – 2.9) | 1.6 (1.1 – 2.2) |      |
| high                                       | 2.2 (1.6 – 3.0) | 1.6 (1.1 – 2.2) |      |

In these sensitivity analyses, the four most cited publications shown in Table S2 are excluded as *cited* publications; they are still included as *citing* publications. \* adjusted for study design and log sample size. \*\* both the 'crude' and adjusted analyses are (additionally) adjusted for type of exposure. \*\*\* only adjusted for study design.

**supportive:** supportive for Strachan's original hygiene hypothesis, i.e. inverse association between siblings/infections and allergy. **non-supportive:** no association or positive association between siblings/infections and allergy. N = number of potentially cited publications; n = number of potential citation paths.

**Table S6. Sensitivity analyses on odds ratios (95% CIs) for the chance of being cited within full network, with a 1-year time lag between cited and citing publication. (N = 110, n = 5057).**

| <b>Publication characteristics,</b>                |                 |                      |                        |
|----------------------------------------------------|-----------------|----------------------|------------------------|
| <b>content-related</b>                             | <b>Crude OR</b> | <b>Adjusted OR *</b> | <b>R<sup>2</sup> *</b> |
| Type of Exposure (ref: both Siblings & Infections) |                 |                      | 0.11                   |
| only Number of Siblings                            | 0.7 (0.5 – 1.0) | 0.4 (0.3 – 0.7)      |                        |
| only Infection History                             | 1.2 (1.0 – 1.6) | 0.8 (0.6 – 1.1)      |                        |
| Study Outcome (ref: non-supportive results) **     |                 |                      | 0.12                   |
| mixed / unclear results                            | 1.2 (0.8 – 1.7) | 2.2 (1.4 – 3.5)      |                        |
| supportive results                                 | 1.7 (1.2 – 2.4) | 3.2 (2.2 – 4.6)      |                        |
| <b>Publication characteristics,</b>                |                 |                      |                        |
| <b>other content-related</b>                       | <b>Crude OR</b> | <b>Adjusted OR *</b> | <b>R<sup>2</sup> *</b> |
| Publication Type (empirical vs synthesis)          | 4.4 (3.2 – 6.0) |                      | 0.05 (crude)           |
| Study Design (ref: cross-sectional)                |                 |                      | 0.09 (crude)           |
| case control                                       | 1.4 (0.9 – 2.2) |                      |                        |
| retrospective cohort                               | 0.9 (0.7 – 1.2) |                      |                        |
| prospective cohort                                 | 0.3 (0.2 – 0.5) |                      |                        |
| narrative review                                   | 0.1 (0.0 – 0.1) |                      |                        |
| systematic review                                  | 3.4 (1.9 – 6.2) |                      |                        |
| editorial / other                                  | 0.3 (0.1 – 0.4) |                      |                        |
| Sample Size (ref: low, n = 3199)                   |                 |                      | 0.02                   |
| medium                                             | 1.6 (1.1 – 2.2) | 1.4 (0.8 – 2.4)      |                        |
| high                                               | 1.4 (1.0 – 2.1) | 1.6 (0.9 – 2.6)      |                        |
| Specificity (ref: low)                             |                 |                      | 0.12                   |
| medium                                             | 2.8 (1.6 – 4.7) | 3.1 (1.7 – 5.6)      |                        |
| high                                               | 10.3 (6.4 – 17) | 6.1 (3.6 – 10)       |                        |

| <b>Publication characteristics,</b>          |                 |                      |                        |
|----------------------------------------------|-----------------|----------------------|------------------------|
| <b>not content-related</b>                   | <b>Crude OR</b> | <b>Adjusted OR *</b> | <b>R<sup>2</sup> *</b> |
| Conclusive Title (yes vs no)                 | 0.5 (0.3 – 0.8) | 0.3 (0.2 – 0.5)      | 0.10                   |
| Funding Source (ref: exclusively non-profit) |                 |                      | 0.10                   |
| profit or both profit/non-profit             | 0.8 (0.6 – 1.2) | 0.8 (0.5 – 1.1)      |                        |
| not reported                                 | 0.4 (0.3 – 0.5) | 0.8 (0.6 – 1.1)      |                        |
| Number of Authors (ref: 1-2)                 |                 |                      | 0.10                   |
| 3 - 5                                        | 2.0 (1.5 – 2.8) | 1.1 (0.7 – 1.8)      |                        |
| >= 6                                         | 3.7 (2.7 – 5.0) | 1.7 (1.0 – 2.6)      |                        |
| Number of Affiliations (ref: 1)              |                 |                      | 0.10                   |
| 2                                            | 3.0 (2.2 – 4.1) | 2.1 (1.4 – 3.0)      |                        |
| >= 3                                         | 2.2 (1.7 – 2.9) | 1.7 (1.2 – 2.3)      |                        |
| Number of References (ref: <30)              |                 |                      | 0.09                   |
| 30 - 50                                      | 1.1 (0.9 – 1.4) | 1.0 (0.8 – 1.3)      |                        |
| >= 50                                        | 0.5 (0.3 – 0.7) | 0.7 (0.4 – 1.3)      |                        |
| <b>Journal characteristics</b>               |                 |                      |                        |
|                                              | <b>Crude OR</b> | <b>Adjusted OR *</b> | <b>R<sup>2</sup> *</b> |
| Journal Impact Factor (ref: 0-2, n = 4580)   |                 |                      | 0.12                   |
| 2 – 4                                        | 3.2 (2.0 – 4.9) | 2.5 (1.6 – 4.0)      |                        |
| >= 4                                         | 5.4 (3.5 – 8.4) | 4.5 (2.9 – 7.1)      |                        |
| <b>Author characteristics</b>                |                 |                      |                        |
|                                              | <b>Crude OR</b> | <b>Adjusted OR *</b> | <b>R<sup>2</sup> *</b> |
| Gender (female vs male, n = 4913)            | 0.8 (0.6 – 1.0) | 0.7 (0.6 – 1.0)      | 0.09                   |
| Region (ref: Europe)                         |                 |                      | 0.11                   |
| North-America                                | 1.0 (0.7 – 1.5) | 1.0 (0.6 – 1.8)      |                        |
| Asia                                         | 0.3 (0.2 – 0.7) | 0.2 (0.1 – 0.4)      |                        |
| Australia / New-Zealand                      | 0.5 (0.3 – 0.9) | 0.5 (0.3 – 0.9)      |                        |
| Type of Affiliation (other vs university)    | 2.3 (1.8 – 2.9) | 1.9 (1.5 – 2.5)      | 0.10                   |
| <b>Citation characteristics</b>              |                 |                      |                        |
|                                              | <b>Crude OR</b> | <b>Adjusted OR *</b> | <b>R<sup>2</sup> *</b> |
| Authority (ref: low)                         |                 |                      | 0.11                   |
| medium                                       | 2.8 (1.9 – 3.9) | 1.9 (1.3 – 2.7)      |                        |
| high                                         | 4.0 (2.9 – 5.5) | 2.8 (2.0 – 4.0)      |                        |

\* adjusted for study design. \*\* both the 'crude' and adjusted analyses are (additionally) adjusted for type of exposure. **supportive:** supportive for Strachan's original hygiene hypothesis, i.e. inverse association between siblings/infections and allergy. **non-supportive:** no association or positive association between siblings/infections and allergy. **N:** number of publications. **n:** number of potential citation paths.

**Table S7. Sensitivity analyses on odds ratios (95% CIs) for the chance of being cited, without citing publications with less than 10 potential citation paths (N = 110, n = 5507).**

| <b>Publication characteristics,</b>                |                 |                      |                        |
|----------------------------------------------------|-----------------|----------------------|------------------------|
| <b>content-related</b>                             | <b>Crude OR</b> | <b>Adjusted OR *</b> | <b>R<sup>2</sup> *</b> |
| Type of Exposure (ref: both Siblings & Infections) |                 |                      | 0.10                   |
| only Number of Siblings                            | 0.8 (0.6 – 1.1) | 0.5 (0.4 – 0.7)      |                        |
| only Infection History                             | 1.2 (1.0 – 1.6) | 0.8 (0.6 – 1.1)      |                        |
| Study Outcome (ref: non-supportive results) **     |                 |                      | 0.12                   |
| mixed / unclear results                            | 1.2 (0.8 – 1.7) | 2.3 (1.5 – 3.6)      |                        |
| supportive results                                 | 1.7 (1.3 – 2.4) | 3.0 (2.1 – 4.2)      |                        |
| <b>Publication characteristics,</b>                |                 |                      |                        |
| <b>other content-related</b>                       | <b>Crude OR</b> | <b>Adjusted OR *</b> | <b>R<sup>2</sup> *</b> |
| Publication Type (empirical vs synthesis)          | 4.2 (3.1 – 5.6) |                      | 0.04 (crude)           |
| Study Design (ref: cross-sectional)                |                 |                      | 0.09 (crude)           |
| case control                                       | 1.4 (1.0 – 2.2) |                      |                        |
| retrospective cohort                               | 0.8 (0.6 – 1.1) |                      |                        |
| prospective cohort                                 | 0.4 (0.2 – 0.5) |                      |                        |
| narrative review                                   | 0.1 (0.0 – 0.1) |                      |                        |
| systematic review                                  | 3.3 (1.8 – 5.8) |                      |                        |
| editorial / other                                  | 0.3 (0.2 – 0.4) |                      |                        |
| Sample Size (ref: low, n = 3423)                   |                 |                      | 0.02                   |
| medium                                             | 1.5 (1.1 – 2.1) | 1.5 (0.9 – 2.5)      |                        |
| high                                               | 1.4 (1.0 – 2.0) | 1.7 (1.1 – 2.8)      |                        |
| Specificity (ref: low)                             |                 |                      | 0.11                   |
| medium                                             | 2.2 (1.4 – 3.6) | 2.5 (1.4 – 4.2)      |                        |
| high                                               | 8.6 (5.6 – 13)  | 4.9 (3.1 – 7.9)      |                        |



| <b>Publication characteristics,</b>          |                 |                      |                        |
|----------------------------------------------|-----------------|----------------------|------------------------|
| <b>not content-related</b>                   | <b>Crude OR</b> | <b>Adjusted OR *</b> | <b>R<sup>2</sup> *</b> |
| Conclusive Title (yes vs no)                 | 0.4 (0.3 – 0.7) | 0.3 (0.2 – 0.5)      | 0.10                   |
| Funding Source (ref: exclusively non-profit) |                 |                      | 0.09                   |
| profit or both profit/non-profit             | 0.9 (0.6 – 1.3) | 0.8 (0.6 – 1.2)      |                        |
| not reported                                 | 0.4 (0.3 – 0.5) | 0.7 (0.5 – 1.0)      |                        |
| Number of Authors (ref: 1-2)                 |                 |                      | 0.09                   |
| 3 - 5                                        | 2.0 (1.5 – 2.7) | 1.1 (0.7 – 1.7)      |                        |
| >= 6                                         | 3.8 (2.8 – 5.2) | 1.7 (1.1 – 2.6)      |                        |
| Number of Affiliations (ref: 1)              |                 |                      | 0.09                   |
| 2                                            | 2.8 (2.1 – 3.7) | 1.9 (1.3 – 2.6)      |                        |
| >= 3                                         | 2.2 (1.7 – 2.9) | 1.6 (1.2 – 2.3)      |                        |
| Number of References (ref: <30)              |                 |                      | 0.09                   |
| 30 - 50                                      | 1.0 (0.8 – 1.3) | 0.9 (0.7 – 1.2)      |                        |
| >= 50                                        | 0.4 (0.3 – 0.6) | 0.8 (0.4 – 1.3)      |                        |
| <b>Journal characteristics</b>               |                 |                      |                        |
|                                              | <b>Crude OR</b> | <b>Adjusted OR *</b> | <b>R<sup>2</sup> *</b> |
| Journal Impact Factor (ref: 0-2, n = 4955)   |                 |                      | 0.11                   |
| 2 – 4                                        | 3.2 (2.1 – 5.0) | 2.5 (1.6 – 3.9)      |                        |
| >= 4                                         | 5.7 (3.8 – 8.8) | 4.6 (3.0 – 7.2)      |                        |
| <b>Author characteristics</b>                |                 |                      |                        |
|                                              | <b>Crude OR</b> | <b>Adjusted OR *</b> | <b>R<sup>2</sup> *</b> |
| Gender (female vs male, n = 5350)            | 0.8 (0.6 – 1.0) | 0.8 (0.6 – 1.0)      | 0.09                   |
| Region (ref: Europe)                         |                 |                      | 0.11                   |
| North-America                                | 0.9 (0.6 – 1.3) | 0.9 (0.5 – 1.4)      |                        |
| Asia                                         | 0.3 (0.2 – 0.6) | 0.2 (0.1 – 0.4)      |                        |
| Australia / New-Zealand                      | 0.5 (0.3 – 0.8) | 0.5 (0.3 – 0.8)      |                        |
| Type of Affiliation (other vs university)    | 2.4 (1.9 – 3.0) | 2.0 (1.6 – 2.6)      | 0.10                   |
| <b>Citation characteristics</b>              |                 |                      |                        |
|                                              | <b>Crude OR</b> | <b>Adjusted OR *</b> | <b>R<sup>2</sup> *</b> |
| Authority (ref: low)                         |                 |                      | 0.11                   |
| medium                                       | 2.4 (1.8 – 3.3) | 1.8 (1.3 – 2.5)      |                        |
| high                                         | 3.8 (2.9 – 5.1) | 2.9 (2.2 – 4.0)      |                        |

\* adjusted for study design. \*\* both the 'crude' and adjusted analyses are (additionally) adjusted for type of exposure. **supportive:** supportive for Strachan's original hygiene hypothesis, i.e. inverse association between siblings/infections and allergy. **non-supportive:** no association or positive association between siblings/infections and allergy. **N:** number of publications. **n:** number of potential citation paths.

# BMJ Open

## Selective citation in the literature on the hygiene hypothesis: a citation analysis on the association between infections and rhinitis

|                                 |                                                                                                                                                                                                                                                                                                                                                                                                                                                                                                                                                                                                                           |
|---------------------------------|---------------------------------------------------------------------------------------------------------------------------------------------------------------------------------------------------------------------------------------------------------------------------------------------------------------------------------------------------------------------------------------------------------------------------------------------------------------------------------------------------------------------------------------------------------------------------------------------------------------------------|
| Journal:                        | <i>BMJ Open</i>                                                                                                                                                                                                                                                                                                                                                                                                                                                                                                                                                                                                           |
| Manuscript ID                   | bmjopen-2018-026518.R2                                                                                                                                                                                                                                                                                                                                                                                                                                                                                                                                                                                                    |
| Article Type:                   | Research                                                                                                                                                                                                                                                                                                                                                                                                                                                                                                                                                                                                                  |
| Date Submitted by the Author:   | 26-Nov-2018                                                                                                                                                                                                                                                                                                                                                                                                                                                                                                                                                                                                               |
| Complete List of Authors:       | Duyx, Bram; Maastricht University NUTRIM School for Nutrition Toxicology and Metabolism<br>Urlings, Miriam; Maastricht University NUTRIM School for Nutrition Toxicology and Metabolism<br>Swaen, Gerard; Maastricht University NUTRIM School for Nutrition Toxicology and Metabolism<br>Bouter, Lex; Amsterdam University Medical Centers, Department of Epidemiology and Biostatistics; Vrije Universiteit Amsterdam, Department of Philosophy<br>Zeegers, Maurice; Maastricht University CAPHRI School for Public Health and Primary Care; Maastricht University NUTRIM School for Nutrition Toxicology and Metabolism |
| <b>Primary Subject Heading</b>: | Epidemiology                                                                                                                                                                                                                                                                                                                                                                                                                                                                                                                                                                                                              |
| Secondary Subject Heading:      | Communication, Immunology (including allergy), Epidemiology, Ethics, Medical publishing and peer review                                                                                                                                                                                                                                                                                                                                                                                                                                                                                                                   |
| Keywords:                       | EPIDEMIOLOGY, Paediatric infectious disease & immunisation < PAEDIATRICS, STATISTICS & RESEARCH METHODS, ETHICS (see Medical Ethics), IMMUNOLOGY                                                                                                                                                                                                                                                                                                                                                                                                                                                                          |
|                                 |                                                                                                                                                                                                                                                                                                                                                                                                                                                                                                                                                                                                                           |

SCHOLARONE™  
Manuscripts

**Selective citation in the literature on the hygiene hypothesis:  
a citation analysis on the association between infections and rhinitis**

Bram Duyx<sup>1\*</sup> [b.duyx@maastrichtuniversity.nl](mailto:b.duyx@maastrichtuniversity.nl)

Miriam J.E. Urlings<sup>1</sup> [mje.urlings@maastrichtuniversity.nl](mailto:mje.urlings@maastrichtuniversity.nl)

Gerard M.H. Swaen<sup>1</sup> [g.swaen@maastrichtuniversity.nl](mailto:g.swaen@maastrichtuniversity.nl)

Lex M. Bouter<sup>2,3</sup> [lm.bouter@vu.nl](mailto:lm.bouter@vu.nl)

Maurice P. Zeegers<sup>1,4</sup> [m.zeegers@maastrichtuniversity.nl](mailto:m.zeegers@maastrichtuniversity.nl)

<sup>1</sup> Nutrition and Translational Research in Metabolism (School NUTRIM), Maastricht University, Maastricht, The Netherlands.

<sup>2</sup> Department of Epidemiology and Biostatistics, Amsterdam University Medical Centers, Amsterdam, The Netherlands

<sup>3</sup> Department of Philosophy, Faculty of Humanities, Vrije Universiteit, Amsterdam, The Netherlands

<sup>4</sup> Care and Public Health Research Institute (School CAPHRI), Maastricht University, Maastricht, The Netherlands.

\* Corresponding author

### **Conflict of Interest**

All authors declare to have no conflict of interest.

### **Funding**

This project has received funding from the Long-range Research Initiative (LRI) from the European Chemical Industry Council (CEFIC), grant no. LRI-Q3-UM. LRI had no role in study design, data collection and analysis, preparation of the manuscript, or decision to publish.

**Word count main text: 4,347**

## **Abstract**

**Objective:** Our objective was to assess the occurrence and determinants of selective citation in scientific publications on Strachan's original hygiene hypothesis. His hypothesis states that lack of exposure to infections in early childhood increases the risk of rhinitis.

**Setting:** Web of Science Core Collection.

**Participants:** We identified 110 publications in this network, consisting of 5551 potential citations.

**Primary and secondary outcome measures:** Whether a citation occurs or not, measured and analysed according to the pre-registered protocol.

**Results:** We found evidence for citation bias in this field: publications supportive of the hypothesis were cited more often than non-supportive publications (odds ratio adjusted for study design [adjOR]: 2.2, 95% confidence interval [CI]: 1.6 - 3.1), and the same was the case for publications with mixed findings (adjOR: 3.1, CI: 2.2 - 4.5). Other relevant determinants for citation were type of exposure, specificity, journal impact factor, authority and self-citation. Surprisingly, prospective cohort studies were cited less often than other empirical studies.

**Conclusions:** There is clear evidence for selective citation in this research field, and particularly for citation bias.

### **Strengths and limitations of this study**

- The study assesses how evidence regarding the hygiene hypothesis propagates over time by analysing the likelihood of citation.
- It investigates which characteristics of a publication – such as study outcome, journal impact factor, author gender and affiliation, and authority within the field – have an impact on citation.
- We check whether supportive studies are cited more often by other studies within the field, and in particular by reviews (which are supposed to give an unbiased overview of the literature).
- Limitation: only articles related to the original hygiene hypothesis are included in this analysis.

## **Background**

The hygiene hypothesis postulates that a high degree of hygiene in early life will increase the risk of developing allergies later in life (1, 2). The underlying mechanism has been the topic of scientific debate. Over time, this debate led to several adaptations and extensions of the hygiene hypothesis, which, as such, provides a good example of how science progresses. Ideally, this progress should be based on all existing evidence, but this is not always the case (3). A citation analysis can help to reveal which part of the available evidence is taken into account, and which evidence is ignored. The current study does not concern the validity of the hygiene hypothesis per se, but rather the citation relations within the scientific literature on this hypothesis.

The hygiene hypothesis was originally proposed to explain the rising prevalence of allergies, with up to 20% to 40% of the population in developed countries being affected (4). Modern, urbanized life in developed countries generally shows higher levels of hygiene than in previous times or in developing countries. Hygiene limits exposure to infections. Exposure to infections, especially early in life, helps to develop and adapt the immune system to the environment in which we happen to live, in such a way that it learns to discriminate between harmless and harmful intruders. According to the hygiene hypothesis, it is this lack of exposure to relatively harmless intruders early in life, that causes the immune system to malfunction later in life. Hence the rise in allergies.

The hygiene hypothesis has been amended several times since its early days to give rise to newer theories such as the ‘*old friends hypothesis*’ (5, 6). According to this theory, it is not hygiene per se that is causing the rise in allergy prevalence, but the lack of exposure to *some specific* infections, and also to the gut microbiome and to non-viable intruders from the natural environment, such as endotoxins. Humans have been exposed to these ‘old friends’ for many centuries and our immune system has co-evolved in their presence. As a result, our immune

1  
2  
3 system has become dependent on the presence of these old friends in order to develop and  
4 function properly. This adapted hygiene hypothesis states that lack of exposure to these old  
5 friends may give rise not only to allergies, but to auto-immune diseases as well.  
6  
7  
8  
9

10 The original hygiene hypothesis and its later adaptations have a lot in common, and  
11 much of the evidence that is supportive for one hypothesis is equally supportive for the others.  
12 However, this is not always the case. In our project, publications are classified as either  
13 supportive or unsupportive with regards to a hypothesis. For that reason it is important to  
14 precisely define the investigated hypothesis. In our citation network, we focus on the hygiene  
15 hypothesis as it was originally stated by Strachan, and not on later modifications (1, 2). This  
16 allows us to investigate the development of this hypothesis from the start. Concretely, this  
17 means that we focus on the impact of infections and the number of siblings on the development  
18 of rhinitis, like in Strachan's original study (2).  
19  
20  
21  
22  
23  
24  
25  
26  
27  
28  
29

30 The number of publications in the research on the hygiene hypothesis is large. It is  
31 therefore not feasible for authors to cite every relevant publication in the network and some kind  
32 of selection needs to take place. If this selection is based on study outcome, we speak of citation  
33 bias (3, 7). The consequences of citation bias can be similar to those of publication bias and  
34 reporting bias: disregard of counter-evidence leading to unfounded consensus (8) or polarisation  
35 (9), ill-advised research programmes and research waste (8, 10), distorted information in the  
36 media (11), and misguided medical decisions (12). Citation bias has been studied in many  
37 disciplines. Our systematic review gives an overview of these studies (13) . Many of these  
38 studies showed evidence for citation bias in their field, with supportive publications being cited  
39 about twice as often as non-supportive ones.  
40  
41  
42  
43  
44  
45  
46  
47  
48  
49  
50  
51  
52  
53

54 Factors other than study outcome may also have an impact on citation, as was recently  
55 shown by Onodera and Yoshikane (14). Measures for journal status (impact factor), author  
56 status (number of citations, country of affiliation), and collaboration (number of authors,  
57  
58  
59  
60

1  
2  
3 number of affiliations) were often found to be related to citation count. The same was  
4  
5 consistently found for the number of references of the cited publication. Furthermore, the  
6  
7 reporting (15) and source (16, 17) of funding were shown to be related to citation, but the  
8  
9 impact of author's affiliation (18) and gender (19-21) is less clear. On the other hand, sample  
10  
11 size and study design - both markers of study quality, and as such legitimate reasons to base a  
12  
13 citation on - often seem unrelated to citation (17, 18, 22-24). In our previous citation networks,  
14  
15 we also found associations with self-citation and the specificity of a publication, but not with the  
16  
17 title of a publication (25, 26).  
18  
19  
20

21  
22 In our study, we aimed a) to assess the occurrence of citation bias in the scientific  
23  
24 literature on the original hygiene hypothesis; and b) test for other signs of selective citation by  
25  
26 assessing the impact of the other factors described above. We will make use of the claim-  
27  
28 specific methodology developed by Greenberg (8), but with a modification of the statistical  
29  
30 analysis that allows us to test the impact of multiple factors, adjust for study design and take into  
31  
32 account the variation in publication time.  
33  
34  
35  
36  
37  
38  
39

## 40 **Method**

41  
42 Prior to performing the citation network analysis, we described our methods in a study protocol  
43  
44 and stored it at an online repository (27). (Protocol deviations are described in the supplement,  
45  
46 Text S1.) In brief, we applied a search strategy to the Web of Science Core Collection  
47  
48 (WoSCC), identified relevant literature, downloaded these records with their reference lists,  
49  
50 extracted data for each publication, built a dataset with potential citation paths and used  
51  
52 specialised software to determine which citations had occurred. These steps will be explained in  
53  
54 more detail below. Article selection (first based on title, then on abstract and finally full-text;  
55  
56  
57  
58  
59  
60



1  
2  
3 Figure 1) and data extraction were performed independently by MJEU and BD. Results were  
4 compared after each step, and disagreements were resolved in consensus meetings.  
5  
6

7  
8 For clarification: a publication in our network can both cite and be cited by other  
9 publications in the network, leading to a multitude of citation paths. Not all citation paths are  
10 possible as one can only cite articles that were published before. In our study, a citation is  
11 considered possible if the cited publication is published before the citing publication is  
12 submitted. If such *potential* citation occurred, we call it an *actual* citation. (See also  
13 supplementary Text S2.)  
14  
15  
16  
17  
18  
19  
20  
21  
22

### 23 **Search strategy**

24  
25 First, we took Strachan's seminal article in which the hygiene hypothesis was launched as point  
26 of departure (2). Next, we identified all literature within WoSCC referring to this article.  
27  
28 Finally, we limited the output to publications that mentioned hay fever in their title, keywords or  
29 abstract ("*hay fever*" OR "*hayfever*" OR "*hay-fever*" OR "*rhinitis*" OR "*rhino\**"). The search  
30 was performed by BD and updated until 16 August 2017. Only English language publications  
31 were included.  
32  
33  
34  
35  
36  
37  
38  
39

40 The search output was then limited to publications that investigated exposures related to  
41 the original hygiene hypothesis. This means that only publications investigating the effect of  
42 *number of siblings* and *infection history* were included. Publications on helminths infections  
43 were excluded, as different versions of the hygiene hypothesis would make contradictory  
44 predictions regarding their impact on allergies. Both empirical and non-empirical publications  
45 were included.  
46  
47  
48  
49  
50  
51  
52  
53

### 54 **Data extraction**

1  
2  
3 A range of characteristics were extracted or derived from each included publication. These  
4 characteristics are described below and were all tested as determinant of citation in the statistical  
5 analysis.  
6  
7  
8

9  
10 **Publication characteristics – content-related.** The following variables were in this  
11 subcategory: type of exposure, publication type, sample size, specificity, and study outcome.  
12

13  
14 *Type of exposure* refers to the type of exposure that is being studied or reviewed: only  
15 number of siblings, only infection history, or both.  
16  
17

18  
19 *Publication type* was classified into empirical and non-empirical publications. Empirical  
20 publications were further classified into the following *study designs*: cross-sectional, case-  
21 control, retrospective cohort, prospective cohort, and experimental studies. Non-empirical  
22 publications were further classified into: narrative reviews, systematic reviews, and other  
23 (editorials, leading articles, commentaries).  
24  
25  
26  
27  
28  
29

30  
31 *Sample size* concerned the number of participants in the publications. Non-empirical  
32 publications had no sample size. The sample size of the empirical publications was classified  
33 into three equal categories based on tertiles.  
34  
35  
36

37  
38 The *specificity* of the publications varied. Some publications only deal with Strachan's  
39 hygiene hypothesis, others are broader. Specificity ranges from 1 (very broad) to 3 (very  
40 specific). For instance, an empirical publication that only investigates the association between  
41 number of siblings and rhinitis would be classified as '3'; if it also investigates the impact of  
42 helminth infections and growing up on a farm, and if it also includes other health outcomes such  
43 as asthma or auto-immune diseases, it would be classified as '1'.  
44  
45  
46  
47  
48  
49

50  
51 *Study outcome* was scored as follows: 1. supportive of the hygiene hypothesis; 2. mixed  
52 or unclear results; 3. non-supportive of the hygiene hypothesis. An inverse relationship between  
53 past exposure and rhinitis is considered to be supportive for the hygiene hypothesis, while a  
54 neutral or positive relationship was scored as non-supportive. The scoring was based on the  
55  
56  
57  
58  
59  
60

1  
2  
3 authors' interpretation of the results, as it was stated in the text of the publication. (See also Text  
4  
5 S2 for more details.)  
6

7  
8 **Publication characteristics - not content-related.** The following variables were in this  
9  
10 category: conclusiveness of the title, funding source, number of authors, number of affiliations,  
11  
12 and number of references. *Title conclusiveness* was coded as yes if in the title a conclusion was  
13  
14 stated that included the direction of the relationship (e.g. "Inverse relation between infections  
15  
16 and allergies"), otherwise as no (e.g. "Infections, rhinitis, and their relationship"). *Funding*  
17  
18 *source* was coded as non-profit (e.g. government or university), for-profit, both, or not reported.  
19  
20

21  
22 **Journal characteristics.** The following variables were in this category: publisher and  
23  
24 journal impact factor. *Journal impact factor*, in the publication year of the cited publication, was  
25  
26 retrieved from the Journal Citation Reports (JCR) database. *Journal publisher* was also retrieved  
27  
28 from JCR.  
29

30  
31 **Author characteristics.** The following variables were in this category: *gender* of the  
32  
33 corresponding author (see also Text S2), *country* of the corresponding author, and affiliation of  
34  
35 the corresponding author. *Affiliation* was classified as government, university, industry or other.  
36

37  
38 **Citation characteristics.** There were some variables that depend on the cited  
39  
40 publication as well as the citing publication: self-citation and within-network authority. A *self-*  
41  
42 *citation* was defined as a citation between two publications that have at least one author in  
43  
44 common.  
45

46  
47 *Authority* was a measure for the authority of the authors within the network. It was  
48  
49 calculated for each author and each year separately, by counting the number of within-network  
50  
51 citations to all publications in which the author had been involved. As the number of citations is  
52  
53 likely to increase each year, so does the author's authority. Because we were interested in the  
54  
55 authority at the moment of citation, the authority value of a cited publication also depends on  
56  
57  
58  
59  
60

1  
2  
3 the publication year of the citing publication. In case of multiple authors, we used the authority  
4 value of the author with the highest authority in that year.  
5  
6  
7  
8  
9

### 10 **Statistical analysis**

11  
12 The dataset consisted of all potential citation paths between cited and citing publications. A  
13 potential citation path means that the cited publication is published before submission of the  
14 citing publication. The underlying assumption is that publications can only cite other  
15 publications up to the date of submission of the citing publication, and that publications can only  
16 be cited from their publication date onwards. All analyses were pre-registered in the study  
17 protocol unless mentioned otherwise.  
18  
19  
20  
21  
22  
23  
24  
25

26 **Impact of the cited publication characteristics.** Our binary dependent variable was  
27 citation within the network (or, more precisely, whether a potential citation had occurred or not).  
28 This was determined by the built-in algorithm of CitNetExplorer (28). This algorithm makes use  
29 of reference lists that can be downloaded from the Web of Science Core Collection. It links the  
30 reference lists of all publications in the network with the actual publications in the network. If  
31 possible, this linkage was done by DOI, the unique Digital Object Identifier assigned to most  
32 present-day publications; otherwise it was based on a combination of first author's surname,  
33 first author's first initial, publication year, volume number and first page number. The  
34 determinants of citation in our analyses were the characteristics of the cited publication as  
35 described above.  
36  
37  
38  
39  
40  
41  
42  
43  
44  
45  
46  
47  
48

49 Since each publication could refer to multiple other publications, the potential citation  
50 paths were related. Therefore we used a multilevel approach in which the potential citations  
51 were nested under the citing publication. Specifically, we performed a univariate random-effects  
52 logistic regression for each determinant of citation. We repeated these analyses while adjusting  
53 for study design, as a proxy for study quality. Another proxy for study quality would be the  
54  
55  
56  
57  
58  
59  
60

1  
2  
3 study sample size. However, as reviews do not have a sample size, this adjusted analysis could  
4  
5 only be performed on the sub-selection of cited empirical publications so we did not adjust for  
6  
7 sample size in the main analysis.  
8  
9

10 In addition to the original analysis plan in the protocol, we also calculated the explained  
11  
12 variance of the adjusted models, so that these models are easier to compare. For this purpose we  
13  
14 calculated McFadden's  $R^2$ .  
15  
16

17 **Additional analyses** were performed on sub-selections of the network: a) only cited  
18  
19 empirical publications were included (to investigate which empirical evidence is picked up by  
20  
21 the rest of the field; explorative analysis); b) only cited empirical publications and citing  
22  
23 synthesis publications were included (to investigate which empirical evidence is picked up  
24  
25 particularly by reviews and editorials). These analyses were adjusted not only for study design  
26  
27 but also for log-transformed sample size because in these sub-selections all cited publications  
28  
29 had a sample size.  
30  
31  
32

33 To check the robustness of our findings we also ran some sensitivity analyses in which  
34  
35 the following publications or citation paths were excluded: c) the most cited publications  
36  
37 (explorative analysis); d) citation paths with less than one year between publication date of the  
38  
39 cited publication and submission date of the citing publication were excluded (to check if a lag  
40  
41 time would make a difference as it takes some time before most publications are known and  
42  
43 have an impact); e) citing publications that have less than ten potential citations.  
44  
45  
46

47 **Concordance analysis.** Where applicable, we also calculated whether the cited and the  
48  
49 citing publications had the same characteristics (*concordance*). This would, for instance, be the  
50  
51 case if supportive publications would prefer to cite other supportive publications, and if non-  
52  
53 supportive publications would prefer to cite other non-supportive publications. If citation would  
54  
55 be based on the concordance of study outcome, it would be another measure of citation bias. To  
56  
57 test if concordance on several characteristics has an impact on the likelihood of citation,  
58  
59  
60

1  
2  
3 univariate and adjusted (for study design) fixed-effects logistic regression analyses were  
4  
5 applied.  
6  
7  
8  
9

## 10 **Software**

11  
12 We used the built-in algorithm of CitNetExplorer 1.0.0 to extract the actual citations between  
13  
14 publications (28). We used R 3.2.4 to create a dataset with all potential citation paths, based on  
15  
16 the data extraction sheet and the actual citations, and also to calculate the within-network  
17  
18 authority and self-citation score for each potential citation path. Finally, we used Stata 13.1 to  
19  
20 analyse the results.  
21  
22  
23  
24  
25

## 26 **Patient and public involvement**

27  
28 No patients were involved in this study.  
29  
30  
31  
32

## 33 **Results**

34  
35 A total number of 110 publications were identified that fit our criteria, published between 1995  
36  
37 and 2017 (Figure 1, Text S3). Of these, 28 publications focused exclusively on the impact of  
38  
39 household size on rhinitis, 48 on the impact of having had infections, and 34 on the impact of  
40  
41 both types of exposure. This network of 110 publications had a total of 5551 potential and 392  
42  
43 actual citation paths (7%) between these publications. Their main characteristics are depicted in  
44  
45 Table 1 (for more details see Table S1). About two thirds of all publications in the network are  
46  
47 empirical studies (39 cross-sectional, 4 case control, 29 cohort studies, and 1 intervention), one  
48  
49 third are reviews (27 narrative reviews, 2 systematic reviews, and 8 editorials or leading  
50  
51 articles). The study outcome for 35 of the publications was mixed or unclear. Of the remaining  
52  
53 publications with a clear study outcome, about 50% was supportive of the hygiene hypothesis  
54  
55 (41 publications with an inverse association between siblings / infection and rhinitis), and about  
56  
57  
58  
59  
60

1  
2  
3 50% was non-supportive (34 publications with no association, or with a positive association).  
4  
5 The number of citations ranged from 0 (45 publications) to 35, with a median of 1 citation per  
6  
7 publication. A ranking of the most cited publications and authors can be found in Table S2.  
8  
9

10 **Impact of the cited publication characteristics.** The results of the regression analyses  
11 are presented in Table 2. Empirical publications were cited more often than non-empirical  
12  
13 publications. Compared to empirical studies with a cross-sectional design, prospective cohort  
14  
15 studies, narrative reviews and editorials had a lower likelihood of citation, while the two  
16  
17 systematic reviews had a higher likelihood of citation. Other determinants that increased the  
18  
19 likelihood of citation were specificity, journal impact factor, sample size and within-network  
20  
21 authority. Sample size had a modest impact on citation. Publications on only one type of  
22  
23 exposure were cited less often than publications on both types of exposure.  
24  
25  
26  
27

28 Supportive publications had a higher likelihood of being cited than non-supportive  
29  
30 publications. This is in line with our hypothesis. However, publications with mixed results were  
31  
32 cited even more often. This may be due to our scoring algorithm. After all, if a publication  
33  
34 investigated both the number of siblings and the infection history, and it reported dissimilar  
35  
36 outcomes for these two exposures, then this publication would have been scored as having  
37  
38 mixed results. An explorative chi-square test confirmed that type of exposure and study outcome  
39  
40 were related ( $\chi^2(4) = 52, p < 0.0005$ ), with 71% of all publications on both types of exposure  
41  
42 reporting mixed results, compared to 4% of the publications on only number of siblings and  
43  
44 21% of the publications on only infection history. As double exposure studies are also cited  
45  
46 more often compared to the single exposure studies, type of exposure should be considered as a  
47  
48 confounder of study outcome. To correct for this, we performed an explorative random-effects  
49  
50 logistic regression of citation on study outcome, adjusted for both study design and type of  
51  
52 exposure. It showed that supportive publications had the highest chance of being cited (adjusted  
53  
54 odds ratio [adjOR] 3.1, 95% confidence interval [CI] 2.2-4.3), compared to publications with  
55  
56  
57  
58  
59  
60

1  
2  
3 mixed results (adjOR 2.4, CI 1.5-3.7) and with non-supportive results (reference category;  
4  
5 model  $R^2 = 0.12$ ).

6  
7 Surprisingly, publications with a conclusive title were less likely to receive citations. The  
8  
9 format of the title may be prescribed by the journal regulations. We ran some explorative  
10  
11 analyses in which we additionally adjusted for the (log-transformed) journal impact factor or  
12  
13 publisher on top of study design. The impact of title conclusiveness remained high when  
14  
15 additionally adjusted for journal impact factor (adjOR 0.4, CI 0.2-0.6) or publisher (adjOR 0.3,  
16  
17 CI 0.2-0.6).

18  
19  
20  
21 The above results are related to the network as a whole. Of particular importance is how  
22  
23 empirical, evidence-generating publications were cited by the rest of the network. We repeated  
24  
25 the above analyses on a subset of the cited publications, namely the empirical publications, and  
26  
27 tested which of their characteristics were related to citation. The results (Table S3) are very  
28  
29 similar to the analyses on the complete network that include the cited non-empirical  
30  
31 publications.

32  
33  
34  
35 Likewise, we tested how *empirical* publications were cited by *synthesis* publications  
36  
37 (Table S4). Again, the direction and magnitudes of the effects were all very similar, except for  
38  
39 study outcome. Adjusted for study design, (log-transformed) sample size and type of exposure,  
40  
41 supportive empirical publications were much more likely to be cited (adjusted OR 7.3, CI 3.5-  
42  
43 15.5) by reviews and editorials, whereas empirical publications with mixed results seemed less  
44  
45 likely to be cited (adjusted OR 0.4, CI 0.2-0.9) compared to non-supportive empirical  
46  
47 publications (reference category; model  $R^2 = 0.12$ ). As a side note: these analyses are based on a  
48  
49 smaller number of cited and citing publications and should be interpreted with caution.  
50  
51

52  
53 The sensitivity analyses without the four most cited publications showed some dissimilar  
54  
55 results (Table S5). The impact of study outcome decreased, the impact of male authors and of  
56  
57 North-American authors disappeared, and the impact of case-control studies reversed. The other  
58  
59  
60



1  
2  
3 two sensitivity analyses (with a one year lag time immediately after publication; without citing  
4 publications with less than 10 potential citation paths) all showed similar results as the main  
5 analyses (Tables S6-S7).  
6  
7  
8  
9

10 **Concordance analysis.** In addition, we tested whether publications were more likely to  
11 be cited by publications with similar characteristics. The results are shown in Table 3. It shows  
12 that publications tended to be cited mostly by publications with the same type of exposure, with  
13 a similar study outcome, with a corresponding author from the same region, and with one or  
14 more authors in common ('self-citation').  
15  
16  
17  
18  
19  
20  
21  
22  
23  
24  
25

## 26 Discussion

27  
28 Our research aim was to evaluate the impact of study outcome and other factors on the  
29 likelihood of being cited in the scientific literature on the original hygiene hypothesis stated by  
30 David Strachan (2). We found that study outcome, type of exposure, study design, specificity,  
31 title conclusiveness, journal impact factor, and the authors' region, affiliation, authority and self-  
32 citation all have a substantial impact on the likelihood of citation.  
33  
34  
35  
36  
37  
38  
39  
40

41 With regard to study outcome, supportive publications are cited more than three times  
42 more often than non-supportive publications, while publications with mixed results are cited  
43 more than two times as often. This is a clear sign of citation bias, and corroborates previous  
44 findings (13). Similarly, publications are more likely to refer to other publications with the same  
45 study outcome rather than to those that provide counter-evidence to their conclusion. This type  
46 of citation bias (based on concordance) has not been studied frequently. In our previous network  
47 analyses, on trans fatty acids – cholesterol, and on chlorinated water – asthma, we found no  
48 evidence for increased citations between publications with the same study outcomes (25, 26),  
49 but three other studies, all related to cardiovascular disease, did find evidence for this type of  
50  
51  
52  
53  
54  
55  
56  
57  
58  
59  
60

1  
2  
3 citation bias (9, 29, 30).  
4  
5

6 The magnitude of citation bias even increases if we focus on how empirical publications  
7 are cited by reviews and editorials. Reviews and editorials in our network are up to 8 times more  
8 likely to cite supportive publications rather than non-supportive ones. As reviews are generally  
9 assumed to give an unbiased summary of the existing evidence, this is a worrying finding. It  
10 confirms the notion that people should be cautious to rely on narrative reviews.  
11  
12  
13  
14  
15  
16  
17

18  
19 Greenberg states that reviews play an important role in the development and acceptance  
20 of belief systems (8). According to him, reviews can amplify the impact of empirical studies  
21 because their evidence is propagated when these reviews are cited themselves. Trinquart et al.  
22 showed that reviews (including systematic reviews) on the health impact of salt intake display  
23 signs of citation bias, and that the conclusions of these reviews were in the same direction as the  
24 evidence they include (9). A similar link between the selective citation of supportive evidence  
25 and supportive conclusions of reviews was found by Leng (29). This mechanism might explain  
26 how reviews can amplify the effect of citation bias. If reviews draw supportive conclusions  
27 based on selective citation of supportive evidence, then support for a hypothesis will be  
28 propagated while counter-evidence will fade from the literature.  
29  
30  
31  
32  
33  
34  
35  
36  
37  
38  
39  
40  
41  
42

43 In our analyses we consider study design as a proxy for study quality. We believe  
44 systematic reviews to be of higher quality than narrative reviews and editorials, and thus to  
45 receive more citations. In our network, this is indeed the case. Similarly, we believe that cohort  
46 studies outrank cross-sectional and case-control studies but to our surprise they are less likely to  
47 be cited. Prospective cohort studies, even though they provide the highest type of evidence in  
48 this network, receive the fewest citations of all empirical study designs. This may be due to the  
49 fact that these cohort studies tend to focus on multiple risk factors of which only one or two are  
50 relevant for the hygiene hypothesis. But the fact that multiple risk factors are investigated in  
51  
52  
53  
54  
55  
56  
57  
58  
59  
60

1  
2  
3 these cohort studies does not imply that their findings on the impact of siblings or infections are  
4 of any lesser value or should be ignored.  
5  
6  
7

8  
9 This study has several limitations. First, it includes two overlapping sub-networks, as is  
10 shown by the high odds ratio in the concordance analysis of type of exposure. This makes it  
11 difficult to infer for which result a certain publication was cited. Related to this issue, the pre-  
12 registered operationalization of study outcome could not be applied because of the hybrid nature  
13 of the network, so we developed a scoring system that fits better. Also, there are different  
14 versions of the hygiene hypothesis, and support for one version may not be supportive for  
15 another one. We dealt with this issue by limiting ourselves to Strachan's original hygiene  
16 hypothesis, and by excluding any determinants with conflicting predictions in different versions.  
17  
18 Despite these limitations, sensitivity analyses show that the results seem robust against chance  
19 findings. Another limitation is our use of odds ratios to assess the likelihood of citation. The  
20 odds ratio may overestimate the true relative risk in studies where the outcome is common (i.e.  
21 occurs in more than 5% of all cases, (31)). In our network, citation is not a common outcome  
22 (7%) and consequently the overestimation of the true relative risk will be relatively small.  
23  
24  
25  
26  
27  
28  
29  
30  
31  
32  
33  
34  
35  
36  
37  
38

39 To conclude, there is evidence for selective citation in this network. Several  
40 characteristics of a publication can make it more likely to be cited such as the authority and the  
41 region of the author, the impact factor of the journal, the way in which the title was stated, and  
42 also study design and study outcome. The fact that supportive publications are cited more often  
43 than non-supportive ones, particularly if we look at how empirical publications are being picked  
44 up by the rest of the network, is a clear sign of citation bias. Finally, this study also shows that  
45 particularly narrative reviews may have a preference to refer to supportive evidence.  
46  
47  
48  
49  
50  
51  
52  
53  
54  
55  
56  
57  
58

59 **Availability of data and material:**  
60

1  
2  
3 The protocol and the data of this study are available upon request in the DataVerse repository,  
4 <http://hdl.handle.net/10411/ZKGGOG>, or by sending an email to  
5  
6  
7  
8 b.duyx@maastrichtuniversity.nl.  
9

### 11 **Author Contributions:**

12  
13  
14 BD was involved in the research design and data analysis plan, prepared the research protocol,  
15 developed and performed the search strategy, wrote the R scripts for data transformation and  
16 calculation, performed article selection and data extraction, conducted the analyses and wrote  
17 the manuscript. MJEU was involved in the research design and data analysis plan, performed the  
18 article selection and data extraction, and read, commented on and approved the final manuscript.  
19  
20  
21 GMHS obtained funding, was involved in the research design and data analysis plan, and read,  
22 commented on and approved the final manuscript. MPZ obtained funding, was involved in the  
23 research design and data analysis plan, and read, commented on and approved the final  
24 manuscript. LMB was involved in the research design and data analysis plan, and read,  
25 commented on and approved the final manuscript.  
26  
27  
28  
29  
30  
31  
32  
33  
34  
35  
36  
37  
38  
39

### 40 **Transparency declaration:**

41  
42 The guarantor affirms that the manuscript is an honest, accurate, and transparent account of the  
43 study being reported; that no important aspects of the study have been omitted; and that any  
44 discrepancies from the study as planned and registered have been explained in the supplement.  
45  
46  
47  
48  
49  
50

### 51 **Copyright statement:**

52  
53 This is an Open Access article distributed in accordance with the terms of the Creative  
54 Commons Attribution (CC BY 4.0) license, which permits others to distribute, remix, adapt and  
55 build upon this work, for commercial use, provided the original work is properly cited. See:  
56  
57  
58  
59  
60 <http://creativecommons.org/licenses/by/4.0/>.

## References

1. Strachan D. Family size, infection and atopy: the first decade of the 'hygiene hypothesis'. *Thorax*. 2000;55(suppl 1):S2-10.
2. Strachan DP. Hay-fever, hygiene, and household size. *BMJ*. 1989;299(6710):1259-60.
3. Song F, Parekh S, Hooper L, Loke YK, Ryder J, Sutton AJ, et al. Dissemination and publication of research findings: An updated review of related biases. *Health Technol Assess*. 2010;14(8):1-193.
4. Platts-Mills TAE. The allergy epidemics: 1870-2010. *J Allergy Clin Immunol*. 2015;136(1):3-13.
5. Rook GA. Regulation of the immune system by biodiversity from the natural environment: An ecosystem service essential to health. *Proc Natl Acad Sci U S A*. 2013;110(46):18360-7.
6. Rook GA. Evolution, human-microbe interactions and the "epidemic" of inflammation-related disorders (alias: the hygiene hypothesis). *The Biomedical & Life Sciences Collection: Henry Stewart Talks Ltd, London; 2016*.
7. Fanelli D. Positive results receive more citations, but only in some disciplines. *Scientometrics*. 2013;94(2):701-9.
8. Greenberg SA. How citation distortions create unfounded authority: Analysis of a citation network. *BMJ*. 2009;339.
9. Trinquart L, Johns DM, Galea S. Why do we think we know what we know? A metaknowledge analysis of the salt controversy. *Int J Epidemiol*. 2016;45(1):251-60.
10. Andrade NS, Flynn JP, Bartanusz V. Twenty-year perspective of randomized controlled trials for surgery of chronic nonspecific low back pain: Citation bias and tangential knowledge. *Spine J*. 2013;13(11):1698-704.
11. Chapman S, Ragg M, McGeechan K. Citation bias in reported smoking prevalence in people with schizophrenia. *Aust NZ J Psychiat*. 2009;43(3):277-82.
12. Koren G, Nickel C. Perpetuating fears: bias against the null hypothesis in fetal safety of drugs as expressed in scientific citations. *J Popul Ther Clin Pharmacol*. 2011;18(1).

13. Duyx B, Urlings MJE, Swaen GMH, Bouter LM, Zeegers MP. Scientific citations favor positive results: a systematic review and meta-analysis. *J Clin Epidemiol*. 2017;88:92-101.
14. Onodera N, Yoshikane F. Factors affecting citation rates of research articles. *Journal of the Association for Information Science and Technology*. 2015;66(4):739-64.
15. Rigby J. Looking for the impact of peer review: does count of funding acknowledgements really predict research impact? *Scientometrics*. 2013;94(1):57-73.
16. Conen D, Torres J, Ridker PM. Differential citation rates of major cardiovascular clinical trials according to source of funding: a survey from 2000 to 2005. *Circulation*. 2008;118(13):1321-7.
17. Kulkarni AV, Busse JW, Shams I. Characteristics associated with citation rate of the medical literature. *PLoS One*. 2007;2(5).
18. Kostoff RN. The difference between highly and poorly cited medical articles in the journal *Lancet*. *Scientometrics*. 2007;72(3):513-20.
19. Dion ML, Sumner JL, Mitchell SM. Gendered Citation Patterns across Political Science and Social Science Methodology Fields. *Political Analysis*. 2018;26(3):312-27.
20. Esarey J, Bryant K. Are Papers Written by Women Authors Cited Less Frequently? *Political Analysis*. 2018;26(3):331-4.
21. Ostby G, Strand H, Nordas R, Gleditsch NP. Gender Gap or Gender Bias in Peace Research? Publication Patterns and Citation Rates for *Journal of Peace Research*, 1983-2008. *International Studies Perspectives*. 2013;14(4):493-506.
22. Annalingam A, Damayanthi H, Jayawardena R, Ranasinghe P. Determinants of the citation rate of medical research publications from a developing country. *SpringerPlus*. 2014;3:140-.
23. Callaham M, Wears RL, Weber E. Journal prestige, publication bias, and other characteristics associated with citation of published studies in peer-reviewed journals. *JAMA*. 2002;287(21):2847-50.
24. Nieminen P, Rucker G, Miettunen J, Carpenter J, Schumacher M. Statistically significant papers in psychiatry were cited more often than others. *J Clin Epidemiol*. 2007;60(9):939-46.
25. Duyx B, Urlings MJE, Swaen GMH, Bouter LM, Zeegers MP. Selective citation in the literature on swimming in chlorinated water and childhood asthma: a network analysis. *Research Integrity and Peer Review*. 2017;2(1):17.

- 1  
2  
3 26. Urlings MJE, Duyx B, Swaen G, Bouter LM, Zeegers MP. Citation bias in the literature  
4 on dietary trans fatty acids and serum cholesterol. J Clin Epidemiol. in press.  
5  
6 27. Duyx B, Urlings MJE, Swaen G, Bouter LM, Zeegers MP. Protocol for citation analysis  
7 of the published literature on the hygiene hypothesis 2017 [Available from: Dataverse  
8 <http://hdl.handle.net/10411/ZKGGOG>].  
9  
10  
11 28. van Eck NJ, Waltman L. CitNetExplorer: A new software tool for analyzing and  
12 visualizing citation networks. Journal of Informetrics. 2014;8(4):802-23.  
13  
14 29. Leng RI. A network analysis of the propagation of evidence regarding the  
15 effectiveness of fatcontrolled diets in the secondary prevention of coronary heart disease  
16 (CHD): Selective citation in reviews. PLoS ONE. 2018;13(5).  
17  
18 30. Sawin VI, Robinson KA. Biased and inadequate citation of prior research in reports  
19 of cardiovascular trials is a continuing source of waste in research. J Clin Epidemiol.  
20 2016;69:174-8.  
21  
22 31. Cummings P. The relative merits of risk ratios and odds ratios. Archives of  
23 pediatrics & adolescent medicine. 2009;163(5):438-45.  
24  
25  
26  
27  
28  
29  
30  
31  
32  
33  
34  
35

### 36 **Figure Legends**

37  
38 Figure 1. Flow diagram of article selection process.  
39  
40  
41  
42  
43  
44  
45  
46  
47  
48  
49  
50  
51  
52  
53  
54  
55  
56  
57  
58  
59  
60

**Table 1. Main characteristics of all 110 publications in hygiene hypothesis network.**

| Characteristic                                   | category                   | N publications | n potential citations | n actual citations (%) |
|--------------------------------------------------|----------------------------|----------------|-----------------------|------------------------|
| Type of Exposure                                 | only Number of Siblings    | 28             | 1512                  | 100 (7%)               |
|                                                  | only Infection History     | 48             | 1946                  | 144 (7%)               |
|                                                  | both Siblings & Infections | 34             | 2093                  | 148 (7%)               |
| Study Outcome                                    | supportive                 | 41             | 2322                  | 198 (9%)               |
| Exposure - Rhinitis                              | mixed results              | 35             | 1913                  | 129 (7%)               |
|                                                  | non-supportive             | 34             | 1316                  | 65 (5%)                |
| Publication Type / Study Design                  | Empirical                  | 73             | 3517                  | 337 (10%)              |
|                                                  | cross-sectional            | 39             | 1697                  | 179 (11%)              |
|                                                  | case-control               | 4              | 249                   | 36 (14%)               |
|                                                  | cohort                     | 29             | 1535                  | 121 (8%)               |
|                                                  | -retrospective             | 15             | 817                   | 89 (11%)               |
|                                                  | -prospective               | 14             | 718                   | 32 (4%)                |
|                                                  | intervention               | 1              | 36                    | 1 (3%)                 |
|                                                  | Synthesis                  | 37             | 2034                  | 55 (3%)                |
|                                                  | narrative review           | 27             | 1423                  | 16 (1%)                |
| systematic review                                | 2                          | 80             | 20 (25%)              |                        |
| editorial, etc                                   | 8                          | 531            | 19 (4%)               |                        |
| Sample Size<br>(cat; for empirical publications) | low (1 – 999)              | 24             | 909                   | 56 (6%)                |
|                                                  | medium (1000 – 7999)       | 25             | 1327                  | 143 (11%)              |
|                                                  | high (>= 8000)             | 24             | 1281                  | 138 (11%)              |
| Journal Impact Factor (cat)                      | 0 - 2                      | 28             | 1275                  | 27 (2%)                |
|                                                  | 2 - 4                      | 41             | 2087                  | 145 (7%)               |
|                                                  | >= 4                       | 32             | 1671                  | 176 (11%)              |
| Gender                                           | male                       | 65             | 3368                  | 265 (8%)               |
|                                                  | female                     | 42             | 2024                  | 123 (6%)               |
|                                                  | unclear                    | 3              | 159                   | 4 (3%)                 |
| Affiliation                                      | university                 | 88             | 4402                  | 258 (6%)               |
|                                                  | government                 | 9              | 410                   | 22 (5%)                |
|                                                  | industry / other           | 13             | 739                   | 112 (15%)              |
| Country                                          | Europe                     | 62             | 3903                  | 324 (8%)               |
|                                                  | North-America              | 19             | 688                   | 38 (6%)                |
|                                                  | Asia                       | 21             | 484                   | 9 (2%)                 |
|                                                  | Australia / New Zealand    | 8              | 476                   | 21 (4%)                |
| <b>Total</b>                                     |                            | <b>110</b>     | <b>5551</b>           | <b>392 (7%)</b>        |



**Table 2. Odds ratios (95% CIs) for the chance of being cited, all types of publications included, N = 110, n = 5551 )**

| <b>Publication characteristics,</b>                |                  |                      |                        |
|----------------------------------------------------|------------------|----------------------|------------------------|
| <b>content-related</b>                             | <b>Crude OR</b>  | <b>Adjusted OR *</b> | <b>R<sup>2</sup> *</b> |
| Type of Exposure (ref: both Siblings & Infections) |                  |                      | 0.10                   |
| only Number of Siblings                            | 0.8 (0.6 – 1.1)  | 0.5 (0.4 – 0.7)      |                        |
| only Infection History                             | 1.3 (0.97–1.6)   | 0.8 (0.6 – 1.1)      |                        |
| Study Outcome (ref: non-supportive results)        |                  |                      | 0.11                   |
| mixed / unclear results                            | 1.2 (0.9 – 1.7)  | 3.1 (2.2 – 4.5)      |                        |
| supportive results                                 | 1.5 (1.1 – 2.0)  | 2.2 (1.6 – 3.1)      |                        |
| <b>Publication characteristics,</b>                |                  |                      |                        |
| <b>other content-related</b>                       | <b>Crude OR</b>  | <b>Adjusted OR *</b> | <b>R<sup>2</sup> *</b> |
| Publication Type (empirical vs synthesis)          | 4.3 (3.2 – 5.7)  |                      | 0.04 (crude)           |
| Study Design (ref: cross-sectional)                |                  |                      | 0.09 (crude)           |
| case control                                       | 1.4 (0.9 – 2.2)  |                      |                        |
| retrospective cohort                               | 0.9 (0.7 – 1.2)  |                      |                        |
| prospective cohort                                 | 0.3 (0.2 – 0.5)  |                      |                        |
| narrative review                                   | 0.1 (0.0 – 0.1)  |                      |                        |
| systematic review                                  | 3.3 (1.8 – 5.8)  |                      |                        |
| editorial / other                                  | 0.3 (0.2 – 0.4)  |                      |                        |
| Sample Size (ref: low, n = 3517)                   |                  |                      | 0.02                   |
| medium                                             | 1.6 (1.2 – 2.3)  | 1.6 (1.0 – 2.6)      |                        |
| high                                               | 1.6 (1.2 – 2.3)  | 1.9 (1.2 – 3.0)      |                        |
| Specificity (ref: low)                             |                  |                      | 0.11                   |
| medium                                             | 2.5 (1.5 – 4.0)  | 2.7 (1.6 – 4.5)      |                        |
| high                                               | 8.8 (5.8 – 13.5) | 5.0 (3.1 – 7.9)      |                        |

| <b>Publication characteristics,</b>          |                 |                      |                        |
|----------------------------------------------|-----------------|----------------------|------------------------|
| <b>not content-related</b>                   | <b>Crude OR</b> | <b>Adjusted OR *</b> | <b>R<sup>2</sup> *</b> |
| Conclusive Title (yes vs no)                 | 0.4 (0.3 – 0.7) | 0.3 (0.2 – 0.4)      | 0.10                   |
| Funding Source (ref: exclusively non-profit) |                 |                      | 0.09                   |
| profit or both profit/non-profit             | 0.9 (0.6 – 1.2) | 0.8 (0.6 – 1.2)      |                        |
| not reported                                 | 0.4 (0.3 – 0.5) | 0.8 (0.6 – 1.0)      |                        |
| Number of Authors (ref: 1-2)                 |                 |                      | 0.09                   |
| 3 - 5                                        | 1.9 (1.4 – 2.5) | 1.0 (0.7 – 1.5)      |                        |
| >= 6                                         | 3.6 (2.7 – 4.9) | 1.5 (1.0 – 2.4)      |                        |
| Number of Affiliations (ref: 1)              |                 |                      | 0.09                   |
| 2                                            | 2.6 (2.0 – 3.5) | 1.8 (1.3 – 2.5)      |                        |
| >= 3                                         | 2.1 (1.6 – 2.8) | 1.6 (1.1 – 2.2)      |                        |
| Number of References (ref: <30)              |                 |                      | 0.09                   |
| 30 - 50                                      | 1.1 (0.8 – 1.3) | 1.0 (0.8 – 1.2)      |                        |
| >= 50                                        | 0.4 (0.3 – 0.6) | 0.8 (0.5 – 1.3)      |                        |
| <b>Journal characteristics</b>               |                 |                      |                        |
|                                              | <b>Crude OR</b> | <b>Adjusted OR *</b> | <b>R<sup>2</sup> *</b> |
| Journal Impact Factor (ref: 0-2, n = 5033)   |                 |                      | 0.11                   |
| 2 – 4                                        | 3.4 (2.2 – 5.3) | 2.7 (1.7 – 4.2)      |                        |
| >= 4                                         | 6.0 (4.0 – 9.2) | 4.9 (3.2 – 7.6)      |                        |
| <b>Author characteristics</b>                |                 |                      |                        |
|                                              | <b>Crude OR</b> | <b>Adjusted OR *</b> | <b>R<sup>2</sup> *</b> |
| Gender (female vs male, n = 5392)            | 0.8 (0.6 – 1.0) | 0.7 (0.6 – 1.0)      | 0.09                   |
| Region (ref: Europe)                         |                 |                      | 0.11                   |
| North-America                                | 0.9 (0.6 – 1.3) | 0.9 (0.5 – 1.4)      |                        |
| Asia                                         | 0.3 (0.1 – 0.6) | 0.2 (0.1 – 0.4)      |                        |
| Australia / New-Zealand                      | 0.5 (0.3 – 0.8) | 0.5 (0.3 – 0.8)      |                        |
| Type of Affiliation (other vs university)    | 2.3 (1.8 – 2.9) | 2.0 (1.5 – 2.5)      | 0.10                   |
| <b>Citation characteristics</b>              |                 |                      |                        |
|                                              | <b>Crude OR</b> | <b>Adjusted OR *</b> | <b>R<sup>2</sup> *</b> |
| Authority (ref: low)                         |                 |                      | 0.11                   |
| medium                                       | 2.4 (1.8 – 3.3) | 1.8 (1.3 – 2.5)      |                        |
| high                                         | 3.7 (2.8 – 4.8) | 2.7 (2.0 – 3.7)      |                        |

\* adjusted for study design. **supportive:** supportive for Strachan's original hygiene hypothesis, i.e. inverse association between siblings/infections and allergy. **non-supportive:** no association or positive association between siblings/infections and allergy. **N:** number of publications. **n:** number of potential citation paths.

**Table 3. Concordance odds ratios (95% CI's) for the chance of being cited, all types of articles included, N = 110, n = 5551)**

| <b>Content-related</b>                       | <b>Crude OR</b> | <b>Adjusted OR *</b> | <b>R<sup>2</sup> *</b> |
|----------------------------------------------|-----------------|----------------------|------------------------|
| Type of Exposure (conc. vs. not)             | 10 (5.6 – 18)   | 13 (7.1 – 23)        | 0.14                   |
| Study Outcome (conc. vs. not, n = 1799)**    | 2.9 (1.4 – 6.0) | 3.4 (1.6 – 7.1)      | 0.06                   |
| <b>Not content-related</b>                   | <b>Crude OR</b> | <b>Adjusted OR *</b> | <b>R<sup>2</sup> *</b> |
| Article Type (conc. vs. not)                 | 1.1 (0.9 – 1.3) |                      | 0.00 (crude)           |
| Funding Source (conc. vs. not, n = 1475)***  | 1.3 (0.8 – 1.9) | 1.2 (0.8 – 1.8)      | 0.05                   |
| Publisher (conc. vs. not, n = 4971)****      | 0.9 (0.7 – 1.2) | 0.9 (0.7 – 1.2)      | 0.08                   |
| Author Affiliation (conc. vs. not)           | 0.7 (0.6 – 0.9) | 0.8 (0.7 – 1.0)      | 0.08                   |
| Author Gender (conc. vs. not, n = 5254)***** | 1.0 (0.8 – 1.3) | 1.0 (0.8 – 1.3)      | 0.08                   |
| Author Region (conc. vs. not)                | 1.9 (1.6 – 2.4) | 2.0 (1.6 – 2.5)      | 0.09                   |
| Self-citation (yes vs no)                    | 6.1 (3.8 – 9.7) | 6.1 (3.7 – 9.9)      | 0.09                   |

\* adjusted for study design of cited publication; \*\* publications with mixed results excluded from analysis; \*\*\* publications without reported funding source excluded from analysis; \*\*\*\* Three main publishers are differentiated: Wiley-Blackwell, BMJ, and Elsevier. Either the cited or the citing publication should be in one of these categories to be included in the analysis. \*\*\*\*\* publications with unclear author's gender excluded from analysis; N: number of publication. n: number of potential citation paths.

## Supplement

**Text S1.** Protocol deviations

**Text S2.** Data extraction

**Text S3.** References of included literature on Strachan's hygiene hypothesis

**Table S1.** All characteristics of the publications in the hygiene hypothesis network.

**Table S2.** Top 6 of articles and authors within network.

**Table S3.** Odds ratios for the chance of *empirical* publications to be cited within full network.

**Table S4.** Odds ratios for the chance of *empirical* publications to be cited by *synthesis* publications.

**Table S5.** Sensitivity analyses on odds ratios for the chance of being cited, without the four most cited publications.

**Table S6.** Sensitivity analyses on odds ratios for the chance of being cited, with a 1-year time lag between cited and citing publication.

**Table S7.** Sensitivity analyses on odds ratios for the chance of being cited, without citing publications with less than 10 potential citation paths.

1  
2  
3  
4  
5  
6  
7  
8  
9  
10  
11  
12  
13  
14  
15  
16  
17  
18  
19  
20  
21  
22  
23  
24  
25  
26  
27  
28  
29  
30  
31  
32  
33  
34  
35  
36  
37  
38  
39  
40  
41  
42  
43  
44  
45  
46  
47  
48  
49  
50  
51  
52  
53  
54  
55  
56  
57  
58  
59  
60

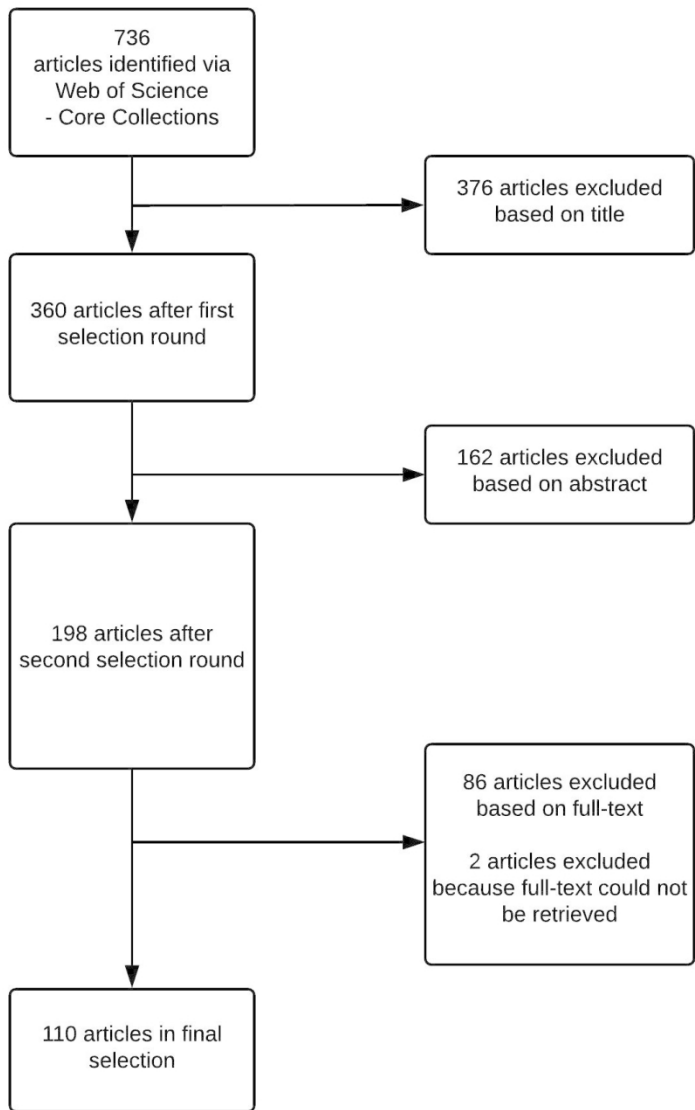

Figure 1. Flow diagram of article selection process.

101x155mm (300 x 300 DPI)

1  
2  
3 **Selective citation in the literature on**  
4  
5 **the hygiene hypothesis**  
6  
7  
8  
9

10  
11  
12 **Supplement**  
13  
14  
15  
16  
17  
18

19 **Text S1.** Protocol deviations  
20

21 **Text S2.** Data extraction  
22

23 **Text S3.** References of included literature on Strachan's hygiene hypothesis  
24  
25  
26  
27

28 **Table S1.** All characteristics of the publications in the hygiene hypothesis network.  
29

30 **Table S2.** Top 6 of articles and authors within network.  
31

32 **Table S3.** Odds ratios for the chance of *empirical* publications to be cited within full network.  
33  
34

35 **Table S4.** Odds ratios for the chance of *empirical* publications to be cited by *synthesis*  
36 publications.  
37

38 **Table S5.** Sensitivity analyses on odds ratios for the chance of being cited, without the four  
39 most cited publications.  
40

41 **Table S6.** Sensitivity analyses on odds ratios for the chance of being cited, with a 1-year time  
42 lag between cited and citing publication.  
43  
44

45 **Table S7.** Sensitivity analyses on odds ratios for the chance of being cited, without citing  
46 publications with less than 10 potential citation paths.  
47  
48  
49  
50  
51  
52  
53  
54  
55  
56  
57  
58  
59  
60

### Text S1. Protocol deviations

*Search strategy.* We ran some checks of our original search strategy (with ‘*hygiene hypothesis*’ in combination with the pre-specified health outcomes). These checks indicated that many relevant publications in the period 1990 – 2000 were missed. Going through these missed publications we found out that the name for this hygiene hypothesis was not yet accepted or used. Also, we realised that almost all relevant publications within this network referred to Strachan’s original study from 1989. We decided to change the search strategy, into *all publications referring to Strachan’s original article*. Additionally, we limited the output to those publications that mentioned ‘rhinitis’ or a similar term in the title, abstract or keywords (see inclusion criteria).

*Inclusion criteria* (regarding the health outcome and types of exposure). Originally, all publications with either health outcome *rhinitis* or *asthma* were to be included. This yielded too many publications in our network, hence we decided to include only publications on rhinitis (or hay fever, or rhinoconjunctivitis). Inclusion solely based on asthma would also have yielded a network that was too large. Also, rhinitis is the original outcome as studied by Strachan. Similarly, we included only publications with exposures *number of siblings* and *infection history*. These are the two most important types of exposure related to the hygiene hypothesis as originally stated by Strachan. Number of siblings was originally studied by Strachan, and infections during childhood (or during pregnancy) was his explanation for the relationship between number of siblings and hay fever.

*Types of health outcome.* We intended to score both *asthma* and *rhinitis* as health outcomes. However, as we included only publications that studied the relationship with rhinitis, and excluded publications that were solely on asthma, we decided to focus on rhinitis. Thus, for the

1  
2  
3 empirical publications, we scored the relationships Siblings – Rhinitis and Infections – Rhinitis.  
4  
5 (We also scored asthma, dermatitis and atopic sensitisation, but only for the sensitivity  
6  
7 analyses.) Synthesis publications often did not differentiate between the different allergies in  
8  
9 their general conclusion, so for the synthesis publications we scored statements on Siblings –  
10  
11 Allergy and Infection – Allergy.  
12  
13  
14  
15  
16

17 *Types of exposure.* We focused on two exposures: *number of siblings* (or household size or  
18  
19 sibling order) and *history of infections* (as assessed by parental questionnaire, serology or  
20  
21 medical records). We used this variable also in our analyses; it was scored as a) number of  
22  
23 siblings only, b) only infection history, and c) both number of siblings and infection history.  
24  
25  
26  
27

28 *Study outcome scoring strategy.* There were many empirical publications with contradictory  
29  
30 results, especially in the case of Infections where the results seemed to depend on the type of  
31  
32 infection. In order to deal with this, we decided to use the *authors' conclusion* on Siblings –  
33  
34 Rhinitis and Infections – Rhinitis as leading. We used 5 categories: 0. not measured or reported;  
35  
36 1. effect in line with hygiene hypothesis (inverse relationship); 2. no relationship; 3. effect  
37  
38 contrary to hygiene hypothesis (positive relationship); 4. mixed or unclear results. Synthesis  
39  
40 publications were scored in a similar way, but then on Siblings – Allergy and Infections –  
41  
42 Allergy.  
43  
44  
45  
46

47 If no clear authors' conclusion was stated in the empirical publications, we used the data  
48  
49 that were presented in the tables or the text and scored as follows: 1. statistically significant  
50  
51 inverse relationship; 2. no statistically significant relationship; 3. statistically significant positive  
52  
53 relationship; 4. mixed or unclear results. If both adjusted analyses and crude analyses were  
54  
55 presented we preferred the adjusted ones. There is one exception: adjustment for Infections in  
56  
57  
58  
59  
60



1  
2  
3 the relationship Siblings – Rhinitis; after all, the hygiene hypothesis states that infection is the  
4 mediator between siblings and rhinitis.  
5  
6

7  
8 In the analyses we used one combined measure for study outcome, with three levels: 1)  
9 supportive; 2) mixed results / unclear; 3) non-supportive. Publications were scored as supportive  
10 if the exposure or exposures showed an inverse association with rhinitis. Publications were  
11 scored as non-supportive if there was no association or a positive association of the exposure  
12 with rhinitis. Publications were scored as mixed if the exposure or exposures showed mixed or  
13 unclear results, or if two exposures were investigated, and one showed an inverse association  
14 and the other showed no or a positive association.  
15  
16  
17  
18  
19  
20  
21  
22  
23  
24  
25

26 *General conclusion about the hygiene hypothesis.* While studying the literature on the hygiene  
27 hypothesis we realised that many related hypotheses reside under this name, all evolved from  
28 one another. *The* hygiene hypothesis clearly does not exist. Support for one version of the  
29 hypothesis often implied the refutation of another (older) version. As authors assumed different  
30 versions, their general conclusion on the hygiene hypothesis would not be compatible. We  
31 decided to not score this general conclusion.  
32  
33  
34  
35  
36  
37  
38  
39  
40  
41

42 *Specificity.* We used 3 outcome categories for publication's specificity instead of 5.  
43  
44  
45  
46

47 *Study design.* Ecological studies were excluded from the network. Cohort studies were further  
48 classified as retrospective and prospective cohort studies. This latter step was data-driven  
49 because we realised during the analysis that prospective cohort studies were cited less often.  
50 During exploration of the data, we noticed a big difference in the citation behaviour of  
51 retrospective and prospective cohorts studies. We therefore decided to amend our preregistered  
52 data analysis plan (<http://hdl.handle.net/10411/ZKGGOG>). We differentiated between these  
53  
54  
55  
56  
57  
58  
59  
60

1  
2  
3 research designs (by assigning them a different categorical value), and take this difference into  
4  
5 account in our analyses with study design as determinant or as covariate.  
6  
7

8  
9  
10 *Publisher.* In addition to the protocol we also scored the publisher of the journal, based on the  
11  
12 information in Journal Citation Reports and in Web of Science. This could be interesting for  
13  
14 publisher self-citation concordance analysis.  
15  
16

17  
18  
19 *Explained variance.* In addition to the original analysis plan in the protocol, we also calculated  
20  
21 the explained variance of the adjusted models, so that these models are easier to compare. For  
22  
23 this purpose we calculated McFadden's  $R^2$  by the following formula:  $R^2 = 1 - LL_M/LL_0$  in  
24  
25 which  $LL_M$  stands for the log likelihood of the current regression model and  $LL_0$  stands for the  
26  
27 log likelihood of the empty random-regression model. Both the current and the empty model  
28  
29 (without predictors) were nested under the citing publication. Because of missing values for  
30  
31 certain determinants (such as sample size), some models could be tested only on a sub-selection  
32  
33 of citation paths. If this was the case, then  $LL_0$  was calculated on the same sub-selection of  
34  
35 citation paths.  
36  
37  
38  
39  
40  
41  
42  
43  
44  
45  
46  
47  
48  
49  
50  
51  
52  
53  
54  
55  
56  
57  
58  
59  
60

## Text S2. Data extraction

Most variables are described in the main document. Here follows some additional information for some of the variables.

**Study outcome** was scored as follows: 1. supportive of the hygiene hypothesis; 2. mixed or unclear results; 3. non-supportive of the hygiene hypothesis. An inverse relationship between past exposure and rhinitis is considered to be supportive for the hygiene hypothesis, while a neutral or positive relationship was scored as non-supportive. The scoring was based on the authors' interpretation of the results, as it was stated in the text of the publication. If the authors' interpretation was unclear, we scored study outcome based on the direction and statistical significance of the data. Non-empirical publications seldom distinguished between allergy subtypes, so we used the stated conclusion on general allergy as outcome measure.

Exposure could be either number of siblings (or order of siblings or household size) or history of bacterial or viral infection (as assessed by parental questionnaire, serology, or medical records). If the impact of number of both siblings and infection history was assessed and they were contradicting each other (with one exposure showing inverse association, the other a neutral or positive association), then study outcome was scored as mixed.

**Gender of the corresponding author** was assessed by first name, with help of [www.genderchecker.com](http://www.genderchecker.com); if first name was not given, other articles of the same author were searched, and the profile of the author at the university or at [www.researchgate.com](http://www.researchgate.com) was checked.

We performed a validity check of the gender assessment on a random sample of 20 publications. We checked our original assessment (described above) against the results from another gender assessment tool: Gender-API.com. This tool takes into account the person's country while assessing gender based on his or her first name. Additionally, it gives an accuracy

score for each assessment. The results can be found in the Table below. Our reference assessment reached the same results as the original one, with a 100% accuracy.

**Table. Validity check for gender assessment on random sample (N=20).**

| ID <sup>1</sup> | First Name of Corresponding Author         | Country of Corresponding Author | Genderchecker Assessment       | Our Data-extraction Assessment | Gender-API Assessment <sup>2</sup> (validity check) | Accuracy of Gender-API Assessment <sup>2</sup> |
|-----------------|--------------------------------------------|---------------------------------|--------------------------------|--------------------------------|-----------------------------------------------------|------------------------------------------------|
| 1               | David                                      | UK                              | male                           | male                           | male                                                | 99%                                            |
| 5               | Barbara                                    | UK                              | female                         | female                         | female                                              | 98%                                            |
| 13              | Nick <sup>3</sup>                          | UK                              | male                           | male                           | male                                                | 98%                                            |
| 14              | Sarah <sup>3</sup>                         | UK                              | female                         | female                         | female                                              | 98%                                            |
| 18              | Juha                                       | Finland                         | unisex                         | male <sup>4</sup>              | male                                                | 100%                                           |
| 24              | Anthony                                    | UK                              | male                           | male                           | male                                                | 99%                                            |
| 25              | Erika                                      | Germany                         | female                         | female                         | female                                              | 98%                                            |
| 26              | Mustafa                                    | Turkey                          | male                           | male                           | male                                                | 100%                                           |
| 31              | Johannes                                   | Germany                         | male                           | male                           | male                                                | 99%                                            |
| 35              | Paolo                                      | Italy                           | male                           | male                           | male                                                | 99%                                            |
| 73              | Anne-Louise <sup>5</sup><br>Anne<br>Louise | Australia                       | no match<br>unisex<br>female   | female                         | female                                              | 100%                                           |
| 75              | Keiko                                      | Japan                           | female                         | female                         | female                                              | 99%                                            |
| 78              | Aarif                                      | Turkey                          | male                           | male                           | male                                                | 75%                                            |
| 79              | Sharad                                     | India                           | male                           | male                           | male                                                | 100%                                           |
| 87              | Woei Kang <sup>5</sup><br>Woei<br>Kang     | Singapore                       | no match<br>male<br>unisex     | male                           | male<br>male                                        | 67%<br>88%                                     |
| 94              | Jonathan                                   | USA                             | male                           | male                           | male                                                | 99%                                            |
| 95              | Ahmet                                      | Turkey                          | male                           | male                           | male                                                | 100%                                           |
| 97              | Chun-Yuh <sup>5</sup><br>Chun<br>Yuh       | Taiwan                          | no match<br>unisex<br>no match | male <sup>4</sup>              | male<br>male                                        | 53%<br>60%                                     |
| 103             | David                                      | UK                              | male                           | male                           | male                                                | 99%                                            |
| 109             | Katherine                                  | USA                             | female                         | female                         | female                                              | 99%                                            |

**Notes.** 1. See Text S3 for the references. 2. Based on combination of first name and country. 3. First name was not stated in publication, but retrieved via ResearchGate.net; match between profile and corresponding author based on surname, initials, affiliation and research topic. 4. Web search revealed a man with same name and affiliation. 5. Composite names that could not be assessed as a whole were assessed by its composites.

1  
2  
3       **Time to citation** was the number of years between the publication date of the cited  
4 publication and the submission date of the citing publication. This variable was not used as  
5 determinant of citation, but to determine the dataset of potential citation paths: only citation  
6 paths with a positive value for *time to citation* were considered a potential citation, and only  
7 potential citations were included in our dataset.  
8  
9  
10  
11  
12  
13

14       As *publication date* we used either the online publication date or the paper publication  
15 date, whichever was first. The average duration from submission to publication was nine months  
16 in this network. For 57 publications the *submission date* was not stated. In these cases, it was  
17 estimated by subtracting nine months from the publication date.  
18  
19  
20  
21  
22  
23  
24  
25  
26  
27  
28  
29  
30  
31  
32  
33  
34  
35  
36  
37  
38  
39  
40  
41  
42  
43  
44  
45  
46  
47  
48  
49  
50  
51  
52  
53  
54  
55  
56  
57  
58  
59  
60

**Text S3. References of included literature on Strachan's hygiene hypothesis**

1. Strachan DP. Epidemiology of hay-fever - towards a community diagnosis. *Clin Exp Allergy*. 1995;25(4):296-303.
2. Strachan D. Socioeconomic factors and the development of allergy. *Toxicol Lett*. 1996;86(2-3):199-203.
3. Strachan DP, Taylor EM, Carpenter RG. Family structure, neonatal infection, and hay fever in adolescence. *Arch Dis Child*. 1996;74(5):422-6.
4. Burr ML, Merrett TG, Dunstan FDJ, Maguire MJ. The development of allergy in high-risk children. *Clin Exp Allergy*. 1997;27(11):1247-53.
5. Butland BK, Strachan DP, Lewis S, Bynner J, Butler N, Britton J. Investigation into the increase in hay fever and eczema at age 16 observed between the 1958 and 1970 British birth cohorts. *Br Med J*. 1997;315(7110):717-21.
6. Jarvis D, Chinn S, Luczynska C, Burney P. The association of family size with atopy and atopic disease. *Clin Exp Allergy*. 1997;27(3):240-5.
7. Matricardi PM, Rosmini F, Ferrigno L, Nisini R, Rapicetta M, Chionne P, et al. Cross sectional retrospective study of prevalence of atopy among Italian military students with antibodies against hepatitis A virus. *Br Med J*. 1997;314(7086):999-1003.
8. Rasanen M, Laitinen T, Kaprio J, Koskenvuo M, Laitinen LA. Hay fever, asthma and number of older siblings - a twin study. *Clin Exp Allergy*. 1997;27(5):515-8.
9. Serafini U. Do infections protect against asthma and atopy? *Allergy*. 1997;52(9):955-7.
10. Strachan DP. Allergy and family size: A riddle worth solving. *Clin Exp Allergy*. 1997;27(3):235-6.
11. Bodner C, Godden D, Seaton A, Aberdeen WG. Family size, childhood infections and atopic diseases. *Thorax*. 1998;53(1):28-32.
12. Farooqi IS, Hopkin JM. Early childhood infection and atopic disorder. *Thorax*. 1998;53(11):927-32.
13. Jones NS, Carney AS, Davis A. The prevalence of allergic rhinosinusitis: A review. *J Laryngol Otol*. 1998;112(11):1019-30.
14. Lewis SA, Britton JR. Consistent effects of high socioeconomic status and low birth order, and the modifying effect of maternal smoking on the risk of allergic disease during childhood. *Respir Med*. 1998;92(10):1237-44.

15. Ponsonby AL, Couper D, Dwyer T, Carmichael A. Cross sectional study of the relation between sibling number and asthma, hay fever, and eczema. *Arch Dis Child*. 1998;79(4):328-33.
16. von Mutius E. The influence of birth order on the expression of atopy in families: A gene-environment interaction? *Clin Exp Allergy*. 1998;28(12):1454-6.
17. Palmer LJ, Valinsky IJ, Pikora T, Zubrick SR, Landau LI. Environmental factors and asthma and allergy in schoolchildren from Western Australia. *Eur Resp J*. 1999;14(6):1351-7.
18. Pekkanen J, Remes S, Kajosaari M, Husman T, Soininen L. Infections in early childhood and risk of atopic disease. *Acta Paediatr*. 1999;88(7):710-4.
19. Ponsonby AL, Couper D, Dwyer T, Carmichael A, Kemp A. Relationship between early life respiratory illness, family size over time, and the development of asthma and hay fever: A seven year follow up study. *Thorax*. 1999;54(8):664-9.
20. Strachan DP. Lifestyle and atopy. *Lancet*. 1999;353(9163):1457-8.
21. Xu B, Jarvelin MR, Pekkanen J. Prenatal factors and occurrence of rhinitis and eczema among offspring. *Allergy*. 1999;54(8):829-36.
22. Matricardi PM, Rosmini F, Riondino S, Fortini M, Ferrigno L, Rapicetta M, et al. Exposure to foodborne and orofecal microbes versus airborne viruses in relation to atopy and allergic asthma: Epidemiological study. *Br Med J*. 2000;320(7232):412-7.
23. Paunio M, Heinonen OP, Virtanen M, Leinikki P, Patja A, Peltola H. Measles history and atopic diseases - a population-based cross-sectional study. *JAMA-J Am Med Assoc*. 2000;283(3):343-6.
24. Seaton A, Devereux G. Diet, infection and wheezy illness: Lessons from adults. *Pediatr Allergy Immunol*. 2000;11:37-40.
25. von Mutius E. The environmental predictors of allergic disease. *J Allergy Clin Immunol*. 2000;105(1):9-19.
26. Yilmaz M, Bingol G, Altintas D, Kendirli SG. Correlation between atopic diseases and tuberculin responses. *Allergy*. 2000;55(7):664-7.
27. Doull IJM. Does pregnancy prevent atopy? *Clin Exp Allergy*. 2001;31(9):1335-7.
28. Johnston SL, Openshaw PJM. The protective effect of childhood infections - the next challenge is to mimic safely this protection against allergy and asthma. *Br Med J*. 2001;322(7283):376-7.
29. Martinez FD. The coming-of-age of the hygiene hypothesis. *Respir Res*. 2001;2(3):129-32.

- 1
- 2
- 3 30. McKeever TM, Lewis SA, Smith C, Collins J, Heatlie H, Frischer M, et al. Siblings,
- 4 multiple births, and the incidence of allergic disease: A birth cohort study using the West
- 5 Midlands General Practice Research Database. *Thorax*. 2001;56(10):758-62.
- 6
- 7
- 8 31. Ring J, Kramer U, Schafer T, Behrendt H. Why are allergies increasing? *Curr Opin*
- 9 *Immunol*. 2001;13(6):701-8.
- 10
- 11 32. von Mutius E. Infection: Friend or foe in the development of atopy and asthma? The
- 12 epidemiological evidence. *Eur Resp J*. 2001;18(5):872-81.
- 13
- 14 33. Crane J. Asthma and allergic diseases: Is there a downside to cleanliness and can we
- 15 exploit it? *Eur J Clin Nutr*. 2002;56:S39-S43.
- 16
- 17 34. Karmaus W, Botezan C. Does a higher number of siblings protect against the
- 18 development of allergy and asthma? A review. *J Epidemiol Community Health*.
- 19 2002;56(3):209-17.
- 20
- 21 35. Matricardi PM, Rosmini F, Panetta V, Ferrigno L, Bonini S. Hay fever and asthma in
- 22 relation to markers of infection in the United States. *J Allergy Clin Immunol*. 2002;110(3):381-
- 23 7.
- 24
- 25 36. McKeever TM, Lewis SA, Smith C, Collins J, Heatlie H, Frischer M, et al. Early
- 26 exposure to infections and antibiotics and the incidence of allergic disease: A birth cohort study
- 27 with the West Midlands General Practice Research Database. *J Allergy Clin Immunol*.
- 28 2002;109(1):43-50.
- 29
- 30 37. McKeever TM, Lewis SA, Smith C, Hubbard R. The importance of prenatal exposures
- 31 on the development of allergic disease - a birth cohort study using the West Midlands General
- 32 Practice Database. *Am J Respir Crit Care Med*. 2002;166(6):827-32.
- 33
- 34 38. Svanes C, Jarvis D, Chinn S, Omenaas E, Gulsvik A, Burney P, et al. Early exposure to
- 35 children in family and day care as related to adult asthma and hay fever: Results from the
- 36 European Community Respiratory Health Survey. *Thorax*. 2002;57(11):945-50.
- 37
- 38 39. Cremonini F, Gasbarrini A. Atopy, *Helicobacter pylori* and the hygiene hypothesis. *Eur J*
- 39 *Gastroenterol Hepatol*. 2003;15(6):635-6.
- 40
- 41 40. McCune A, Lane A, Murray L, Harvey I, Nair P, Donovan J, et al. Reduced risk of
- 42 atopic disorders in adults with *Helicobacter pylori* infection. *Eur J Gastroenterol Hepatol*.
- 43 2003;15(6):637-40.
- 44
- 45 41. Prescott SL. Allergy: The price we pay for cleaner living? *Ann Allergy Asthma*
- 46 *Immunol*. 2003;90(6):64-70.
- 47
- 48 42. Gustafsson D, Andersson K. Effect of indoor environmental factors on development of
- 49 atopic symptoms in children followed up to 4 years of age. *Paediatr Perinat Epidemiol*.
- 50 2004;18(1):17-25.
- 51
- 52 43. Jones N. Allergic rhinitis: Aetiology, predisposing and risk factors. *Rhinology*.
- 53 2004;42(2):49-56.
- 54
- 55
- 56
- 57
- 58
- 59
- 60



- 1  
2  
3  
4 44. Resch A, Schlipkoter U, Crispin A, Behrendt H, Heinrich J, Wichmann HE, et al. Atopic  
5 disease and its determinants - a focus on the potential role of childhood infection. *Clin Exp*  
6 *Allergy*. 2004;34(8):1184-91.  
7  
8  
9 45. von Hertzen LC, Haahtela T. Asthma and atopy - the price of affluence? *Allergy*.  
10 2004;59(2):124-37.  
11  
12 46. Borchers AT, Keen CL, Gershwin ME. Hope for the hygiene hypothesis: When the dirt  
13 hits the fan. *J Asthma*. 2005;42(4):225-47.  
14  
15 47. Bresciani M, Parisi C, Manghi G, Bonini S. The hygiene hypothesis: Does it function  
16 worldwide? *Curr Opin Allergy Clin Immunol*. 2005;5(2):147-51.  
17  
18 48. Bufford JD, Gem JE. The hygiene hypothesis revisited. *Immunol Allerg Clin North Am*.  
19 2005;25(2):247-+.  
20  
21 49. de Meer G, Janssen NAH, Brunekreef B. Early childhood environment related to  
22 microbial exposure and the occurrence of atopic disease at school age. *Allergy*. 2005;60(5):619-  
23 25.  
24  
25 50. Karmaus W, Johnson CC. Invited commentary: Sibship effects and a call for a  
26 comparative disease approach. *Am J Epidemiol*. 2005;162(2):133-8.  
27  
28 51. Kopp MV, Semmler S, Horst G, Berner R, Forster J. Hospital admission with neonatal  
29 sepsis and development of atopic disease: Is there a link? *Pediatr Allergy Immunol*.  
30 2005;16(8):630-6.  
31  
32 52. Nafstad P, Brunekreef B, Skrondal A, Nystad W. Early respiratory infections, asthma,  
33 and allergy: 10-year follow-up of the Oslo Birth Cohort. *Pediatrics*. 2005;116(2):E255-E62.  
34  
35 53. Westergaard T, Rostgaard K, Wohlfahrt J, Andersen PK, Aaby P, Melbye M. Sibship  
36 characteristics and risk of allergic rhinitis and asthma. *Am J Epidemiol*. 2005;162(2):125-32.  
37  
38 54. Arbes SJ, Sever ML, Vaughn B, Cohen EA, Zeldin DC. Oral pathogens and allergic  
39 disease: Results from the third national health and nutrition examination survey. *J Allergy Clin*  
40 *Immunol*. 2006;118(5):1169-75.  
41  
42 55. Balemans WAF, Rovers MM, Schilder AGM, Sanders EAM, Kimpen JLL, Zielhuis GA,  
43 et al. Recurrent childhood upper respiratory tract infections do not reduce the risk of adult atopic  
44 disease. *Clin Exp Allergy*. 2006;36(2):198-203.  
45  
46 56. Bernsen RMD, van der Wouden JC, Nagelkerke NJD, de Jongste JC. Early life  
47 circumstances and atopic disorders in childhood. *Clin Exp Allergy*. 2006;36(7):858-65.  
48  
49 57. Biagini JM, LeMasters GK, Ryan PH, Levin L, Reponen T, Bernstein DI, et al.  
50 Environmental risk factors of rhinitis in early infancy. *Pediatr Allergy Immunol*.  
51 2006;17(4):278-84.  
52  
53  
54  
55  
56  
57  
58  
59  
60

- 1  
2  
3 58. Friedrich N, Volzke H, Schwahn C, Kramer A, Junger M, Schafer T, et al. Inverse  
4 association between periodontitis and respiratory allergies. *Clin Exp Allergy*. 2006;36(4):495-  
5 502.  
6  
7  
8 59. Kinra S, Smith GD, Jeffreys M, Gunnell D, Galobardes B, McCarron P. Association  
9 between sibship size and allergic diseases in the Glasgow Alumni Study. *Thorax*.  
10 2006;61(1):48-53.  
11  
12 60. Kocabas E, Yapicioglu H, Yildizdas D, Kendirli SG, Burgut R. The prevalence of atopy  
13 in children with antibodies against hepatitis A virus and hepatitis B virus. *Turk J Pediatr*.  
14 2006;48(3):189-96.  
15  
16  
17 61. Paunio M, Peltola H, Virtanen M, Leinikki P, Makela A, Heinonen OP. Acute infections,  
18 infection pressure, and atopy. *Clin Exp Allergy*. 2006;36(5):634-9.  
19  
20  
21 62. Zutavern A, von Klot S, Gehring U, Krauss-Etschmann S, Heinrich J. Pre-natal and post-  
22 natal exposure to respiratory infection and atopic diseases development: A historical cohort  
23 study. *Respir Res*. 2006;7:8.  
24  
25  
26 63. Cakir M, Karakas T, Orhan F, Okten A, Gedik Y. Atopy in children with chronic  
27 hepatitis B virus infection. *Acta Paediatr*. 2007;96(9):1343-6.  
28  
29  
30 64. Cetinkaya F, Uslu HS, Nuhoglu A. Effect of neonatal sepsis on the development of  
31 allergies and asthma in later childhood. *Int Arch Allergy Immunol*. 2007;142(2):145-50.  
32  
33  
34 65. Dunder T, Tapiainen T, Pokka T, Uhari M. Infections in child day care centers and later  
35 development of asthma, allergic rhinitis, and atopic dermatitis - prospective follow-up survey 12  
36 years after controlled randomized hygiene intervention. *Arch Pediatr Adolesc Med*.  
37 2007;161(10):972-7.  
38  
39  
40 66. Harris JM, Mills P, White C, Moffat S, Taylor AJN, Cullinan P. Recorded infections and  
41 antibiotics in early life: Associations with allergy in UK children and their parents. *Thorax*.  
42 2007;62(7):631-7.  
43  
44  
45 67. von Mutius E. Allergies, infections and the hygiene hypothesis - the epidemiological  
46 evidence. *Immunobiology*. 2007;212(6):433-9.  
47  
48  
49 68. Baccioglu A, Kalpaklioglu F, Guliter S, Yakaryilmaz F. *Helicobacter pylori* in allergic  
50 inflammation - fact or fiction? *Allergol Immunopath*. 2008;36(2):85-9.  
51  
52  
53 69. Blaser MJ, Chen Y, Reibman J. Does *Helicobacter pylori* protect against asthma and  
54 allergy? *Gut*. 2008;57(5):561-7.  
55  
56  
57 70. Bremner SA, Carey IM, DeWilde S, Richards N, Maier WC, Hilton SR, et al. Infections  
58 presenting for clinical care in early life and later risk of hay fever in two UK birth cohorts.  
59 *Allergy*. 2008;63(3):274-83.  
60  
61  
62 71. Chen Y, Blaser MJ. *Helicobacter pylori* colonization is inversely associated with  
63 childhood asthma. *J Infect Dis*. 2008;198(4):553-60.

- 1  
2  
3 72. Perzanowski MS, Canfield SM, Chew GL, Mellins RB, Hoepner LA, Jacobson JS, et al.  
4 Birth order, atopy, and symptoms of allergy and asthma among inner-city children attending  
5 head start in New York City. *Clin Exp Allergy*. 2008;38(6):968-76.  
6  
7  
8 73. Ponsonby AL, Kemp A. Investigation of the hygiene hypothesis: Current issues and  
9 future directions. *Allergy*. 2008;63(5):506-8.  
10  
11 74. Svanes C. What has the ecchs told us about the childhood risks of asthma, allergy and  
12 lung function? *Clin Respir J*. 2008;2:34-44.  
13  
14 75. Tanaka K, Miyake Y, Arakawa M, Sasaki S, Ohya Y. Dental caries and allergic  
15 disorders in Japanese children: The Ryukyus Child Health Study. *J Asthma*. 2008;45(9):795-9.  
16  
17 76. Torres-Borrego J, Molina-Teran AB, Montes-Mendoza C. Prevalence and associated  
18 factors of allergic rhinitis and atopic dermatitis in children. *Allergol Immunopath*.  
19 2008;36(2):90-100.  
20  
21 77. Vargas C, Bustos P, Diaz PV, Amigo H, Rona RJ. Childhood environment and atopic  
22 conditions, with emphasis on asthma in a chilean agricultural area. *J Asthma*. 2008;45(1):73-8.  
23  
24 78. Eifan AO, Akkoc T, Ozdemir C, Bahceciler NN, Barlan IB. No association between  
25 tuberculin skin test and atopy in a bacillus Calmette-Guerin vaccinated birth cohort. *Pediatr*  
26 *Allergy Immunol*. 2009;20(6):545-50.  
27  
28 79. Gangal SV, Chowgule R. Infections in early life and susceptibility to allergic diseases:  
29 Relevance of hygiene hypothesis. *Curr Sci*. 2009;96(6):784-93.  
30  
31 80. Kendirli SG, Yilmaz M, Bayram I, Altintas DU, Inal A, Karakoc G. Potential association  
32 between allergic diseases and pertussis infection in schoolchildren: Results of two cross-  
33 sectional studies seven years apart. *Allergol Immunopath*. 2009;37(1):21-5.  
34  
35 81. Kramer MS, Matush L, Bogdanovich N, Dahhou M, Platt RW, Mazer B. The low  
36 prevalence of allergic disease in Eastern Europe. *Clin Exp Allergy*. 2009;39(5):708-16.  
37  
38 82. Matheson MC, Walters EH, Simpson JA, Wharton CL, Ponsonby AL, Johns DP, et al.  
39 Relevance of the hygiene hypothesis to early vs. late onset allergic rhinitis. *Clin Exp Allergy*.  
40 2009;39(3):370-8.  
41  
42 83. Ohfuji S, Miyake Y, Arakawa M, Tanaka K, Sasaki S. Sibship size and prevalence of  
43 allergic disorders in Japan: The Ryukyus Child Health Study. *Pediatr Allergy Immunol*.  
44 2009;20(4):377-84.  
45  
46 84. Bunyavanich S, Soto-Quiros ME, Avila L, Laskey D, Senter JM, Celedon JC. Risk  
47 factors for allergic rhinitis in Costa Rican children with asthma. *Allergy*. 2010;65(2):256-63.  
48  
49 85. Codispoti CD, Levin L, LeMasters GK, Ryan P, Reponen T, Villareal M, et al. Breast-  
50 feeding, aeroallergen sensitization, and environmental exposures during infancy are  
51 determinants of childhood allergic rhinitis. *J Allergy Clin Immunol*. 2010;125(5):1054-60.  
52  
53  
54  
55  
56  
57  
58  
59  
60

- 1  
2  
3 86. Arbes SJ, Matsui EC. Can oral pathogens influence allergic disease? *J Allergy Clin Immunol.* 2011;127(5):1119-27.  
4  
5  
6  
7 87. Liew WK, Lim CWT, Tan TH, Wong KY, Tai BC, Quek SC, et al. The effect of  
8 Kawasaki disease on childhood allergies - a sibling control study. *Pediatr Allergy Immunol.*  
9 2011;22(5):488-93.  
10  
11 88. Matheson MC, Dharmage SC, Abramson MJ, Walters EH, Sunyer J, de Marco R, et al.  
12 Early-life risk factors and incidence of rhinitis: Results from the European community  
13 respiratory health study-an international population-based cohort study. *J Allergy Clin Immunol.*  
14 2011;128(4):816-+.  
15  
16  
17 89. Flohr C, Nagel G, Weinmayr G, Kleiner A, Williams HC, Ait-Khaled N, et al.  
18 Tuberculosis, bacillus Calmette-Guerin vaccination, and allergic disease: Findings from the  
19 International Study of Asthma and Allergies in Childhood Phase Two. *Pediatr Allergy Immunol.*  
20 2012;23(4):324-31.  
21  
22  
23 90. Lee SY, Kwon JW, Seo JH, Song YH, Kim BJ, Yu J, et al. Prevalence of atopy and  
24 allergic diseases in Korean children: Associations with a farming environment and rural  
25 lifestyle. *Int Arch Allergy Immunol.* 2012;158(2):168-74.  
26  
27  
28 91. Lighter-Fisher J, Peng CH. Infection with mycobacterium tuberculosis is inversely  
29 associated with childhood asthma. *Pediatr Allergy Immunol Pulmonol.* 2012;25(2):80-5.  
30  
31  
32 92. Nagel G, Weinmayr G, Flohr C, Kleiner A, Strachan DP, Grp IPTS. Association of  
33 pertussis and measles infections and immunizations with asthma and allergic sensitization in  
34 ISAAC Phase Two. *Pediatr Allergy Immunol.* 2012;23(8):737-46.  
35  
36  
37 93. Schmitz R, Atzpodien K, Schlaud M. Prevalence and risk factors of atopic diseases in  
38 German children and adolescents - a nationwide health report. *Pediatr Allergy Immunol.*  
39 2012;23(8):716-23.  
40  
41  
42 94. Silverberg JI, Kleiman E, Silverberg NB, Durkin HG, Joks R, Smith-Norowitz TA.  
43 Chickenpox in childhood is associated with decreased atopic disorders, IgE, allergic  
44 sensitization, and leukocyte subsets. *Pediatr Allergy Immunol.* 2012;23(1):50-8.  
45  
46  
47 95. Duksal F, Akcay A, Becerir T, Ergin A, Becerir C, Guler N. Rising trend of allergic  
48 rhinitis prevalence among Turkish schoolchildren. *Int J Pediatr Otorhinolaryngol.*  
49 2013;77(9):1434-9.  
50  
51  
52 96. Kondrashova A, Seiskari T, Ilonen J, Knip M, Hyoty H. The 'hygiene hypothesis' and the  
53 sharp gradient in the incidence of autoimmune and allergic diseases between Russian Karelia  
54 and Finland. *Apmis.* 2013;121(6):478-93.  
55  
56  
57 97. Kuo HC, Chang WC, Yang KD, Yu HR, Wang CL, Ho SC, et al. Kawasaki disease and  
58 subsequent risk of allergic diseases: A population-based matched cohort study. *BMC Pediatr.*  
59 2013;13:6.  
60

- 1  
2  
3 98. Prokopakis E, Vardouniotis A, Kawauchi H, Scadding G, Georgalas C, Hellings P, et al.  
4 The pathophysiology of the hygiene hypothesis. *Int J Pediatr Otorhinolaryngol*.  
5 2013;77(7):1065-71.  
6  
7  
8 99. Lionetti E, Leonardi S, Lanzafame A, Garozzo MT, Filippelli M, Tomarchio S, et al.  
9 *Helicobacter pylori* infection and atopic diseases: Is there a relationship? A systematic review  
10 and meta-analysis. *World J Gastroenterol*. 2014;20(46):17635-47.  
11  
12 100. Tantilipikorn P. The relationship between allergic rhinitis and viral infections. *Curr Opin*  
13 *Otolaryngol Head Neck Surg*. 2014;22(3):249-52.  
14  
15 101. Kimura H, Konno S, Isada A, Maeda Y, Musashi M, Nishimura M. Contrasting  
16 associations of body mass index and measles with asthma and rhinitis in young adults. *Allergy*  
17 *Asthma Proc*. 2015;36(4):293-9.  
18  
19 102. Lin CH, Lin WC, Wang YC, Lin IC, Kao CH. Association between neonatal urinary  
20 tract infection and risk of childhood allergic rhinitis. *Medicine (Baltimore)*. 2015;94(38):6.  
21  
22 103. Strachan DP, Ait-Khaled N, Foliaki S, Mallol J, Odhiambo J, Pearce N, et al. Siblings,  
23 asthma, rhinoconjunctivitis and eczema: A worldwide perspective from the international study  
24 of asthma and allergies in childhood. *Clin Exp Allergy*. 2015;45(1):126-36.  
25  
26 104. Han CS. A specific hygiene hypothesis. *Med Hypotheses*. 2016;93:146-9.  
27  
28 105. Indinnimeo L, Porta D, Forastiere F, De Vittori V, De Castro G, Zicari AM, et al.  
29 Prevalence and risk factors for atopic disease in a population of preschool children in Rome:  
30 Challenges to early intervention. *Int J Immunopathol Pharmacol*. 2016;29(2):308-19.  
31  
32 106. Sastra S, Irsa L, Loebis MS, Evalina R. Number of siblings and allergic rhinitis in  
33 children. *Paediatr Indones*. 2016;56(1):1-7.  
34  
35 107. Christiansen ES, Kjaer HF, Eller E, Bindslev-Jensen C, Host A, Mortz CG, et al. Early  
36 childhood risk factors for rhinoconjunctivitis in adolescence: A prospective birth cohort study.  
37 *Clin Transl Allergy*. 2017;7:7.  
38  
39 108. Miftahussurur M, Nusi IA, Graham DY, Yamaoka Y. *Helicobacter*, hygiene, atopy, and  
40 asthma. *Front Microbiol*. 2017;8:11.  
41  
42 109. Wander K, Shell-Duncan B, Brindle E, O'Connor K. Hay fever, asthma, and eczema and  
43 early infectious diseases among children in Kilimanjaro, Tanzania. *Am J Hum Biol*.  
44 2017;29(3):13.  
45  
46 110. Yildizdas HY, Ozcan A, Sertdemir Y, Yilmaz M. Effect of healthcare associated  
47 infections and broad spectrum antibiotic use in newborn period on development of asthma,  
48 allergic rhinitis and atopic dermatitis in early childhood. *Cukurova Med J*. 2017;42(1):132-9.  
49  
50  
51  
52  
53  
54  
55  
56  
57  
58  
59  
60

**Table S1. All characteristics of the publications in the hygiene hypothesis network.**

|                                                          |                            | <b>N publications</b> | <b>n potential citations</b> | <b>n actual citations (%)</b> |
|----------------------------------------------------------|----------------------------|-----------------------|------------------------------|-------------------------------|
| <b>Total</b>                                             |                            | 110                   | 5551                         | 392 (7%)                      |
| <b>Publication characteristics - content-related</b>     | <b>category</b>            | <b>N publications</b> | <b>n potential citations</b> | <b>n actual citations (%)</b> |
| Type of Exposure                                         | only Number of Siblings    | 28                    | 1512                         | 100 (7%)                      |
|                                                          | only Infection History     | 48                    | 1946                         | 144 (7%)                      |
|                                                          | both Siblings & Infections | 34                    | 2093                         | 148 (7%)                      |
| Study Outcome                                            | supportive                 | 41                    | 2322                         | 198 (9%)                      |
| Exposure - Rhinitis                                      | mixed results              | 35                    | 1913                         | 129 (7%)                      |
|                                                          | non-supportive             | 34                    | 1316                         | 65 (5%)                       |
| Publication Type / Study Design                          | Empirical                  | 73                    | 3517                         | 337 (10%)                     |
|                                                          | cross-sectional            | 39                    | 1697                         | 179 (11%)                     |
|                                                          | case-control               | 4                     | 249                          | 36 (14%)                      |
|                                                          | cohort                     | 29                    | 1535                         | 121 (8%)                      |
|                                                          | -retrospective             | 15                    | 817                          | 89 (11%)                      |
|                                                          | -prospective               | 14                    | 718                          | 32 (4%)                       |
|                                                          | intervention               | 1                     | 36                           | 1 (3%)                        |
|                                                          | Synthesis                  | 37                    | 2034                         | 55 (3%)                       |
|                                                          | narrative review           | 27                    | 1423                         | 16 (1%)                       |
|                                                          | systematic review          | 2                     | 80                           | 20 (25%)                      |
|                                                          | -with meta-analysis        | 1                     | 8                            | 1 (13%)                       |
|                                                          | editorial, etc             | 8                     | 531                          | 19 (4%)                       |
| Sample Size<br>(cat; for empirical publications)         | low (1 – 999)              | 24                    | 909                          | 56 (6%)                       |
|                                                          | medium (1000 – 7999)       | 25                    | 1327                         | 143 (11%)                     |
|                                                          | high (>= 8000)             | 24                    | 1281                         | 138 (11%)                     |
| Specificity                                              | 0 (non-specific)           | 27                    | 1402                         | 25 (2%)                       |
|                                                          | 1                          | 39                    | 1657                         | 65 (4%)                       |
|                                                          | 2 (specific)               | 44                    | 2492                         | 302 (12%)                     |
| <b>Publication characteristics - not content-related</b> | <b>category</b>            | <b>N publications</b> | <b>n potential citations</b> | <b>n actual citations (%)</b> |
| Conclusive Title                                         | not conclusive             | 99                    | 5026                         | 375 (7%)                      |
|                                                          | conclusive                 | 11                    | 525                          | 17 (3%)                       |

|                        |                        |    |      |           |
|------------------------|------------------------|----|------|-----------|
| Funding Source         | non-profit             | 44 | 2188 | 214 (10%) |
|                        | for-profit             | 1  | 38   | 1 (3%)    |
|                        | both                   | 12 | 559  | 51 (9%)   |
|                        | not reported / unclear | 53 | 2766 | 126 (5%)  |
| Number of Authors      | 1 - 2                  | 32 | 2017 | 89 (4%)   |
|                        | 3 - 5                  | 41 | 2143 | 155 (7%)  |
|                        | >= 6                   | 37 | 1391 | 148 (11%) |
| Number of Affiliations | 1                      | 36 | 2276 | 111 (5%)  |
|                        | 2                      | 24 | 1168 | 108 (9%)  |
|                        | >= 3                   | 50 | 2107 | 173 (8%)  |
| Number of References   | < 30                   | 35 | 2307 | 194 (8%)  |
|                        | 30 - 50                | 49 | 2060 | 159 (8%)  |
|                        | >= 50                  | 26 | 1184 | 39 (3%)   |

| Journal characteristics     | category        | N publications | n potential citations | n actual citations (%) |
|-----------------------------|-----------------|----------------|-----------------------|------------------------|
| Journal Impact Factor (cat) | 0 - 2           | 28             | 1275                  | 27 (2%)                |
|                             | 2 - 4           | 41             | 2087                  | 145 (7%)               |
|                             | >= 4            | 32             | 1671                  | 176 (11%)              |
| Publisher                   | Wiley-Blackwell | 41             | 2107                  | 82 (4%)                |
|                             | BMJ             | 15             | 1170                  | 213 (18%)              |
|                             | Elsevier        | 18             | 894                   | 43 (5%)                |
|                             | other           | 36             | 1380                  | 54 (4%)                |

| <b>Author characteristics</b>   | <b>category</b>  | <b>N publications</b> | <b>n potential citations</b> | <b>n actual citations (%)</b> |
|---------------------------------|------------------|-----------------------|------------------------------|-------------------------------|
| Gender                          | male             | 65                    | 3368                         | 265 (8%)                      |
|                                 | female           | 42                    | 2024                         | 123 (6%)                      |
|                                 | unclear          | 3                     | 159                          | 4 (3%)                        |
| Affiliation                     | university       | 88                    | 4402                         | 258 (6%)                      |
|                                 | government       | 9                     | 410                          | 22 (5%)                       |
|                                 | industry / other | 13                    | 739                          | 112 (15%)                     |
| Country                         | Europe           | 62                    | 3903                         | 324 (8%)                      |
|                                 | UK               | 26                    | 1946                         | 165 (8%)                      |
|                                 | Germany          | 11                    | 594                          | 19 (3%)                       |
|                                 | Finland          | 8                     | 516                          | 33 (6%)                       |
|                                 | Italy            | 7                     | 418                          | 85 (20%)                      |
|                                 | North-America    | 19                    | 688                          | 38 (6%)                       |
|                                 | USA              | 18                    | 662                          | 36 (5%)                       |
|                                 | Asia             | 21                    | 484                          | 9 (2%)                        |
|                                 | Turkey           | 9                     | 303                          | 7 (2%)                        |
|                                 | Japan            | 4                     | 60                           | 0 (0%)                        |
| Australia / New Zealand         | 8                | 476                   | 21 (4%)                      |                               |
| Australia                       | 7                | 407                   | 21 (5%)                      |                               |
| <b>Citation characteristics</b> | <b>category</b>  |                       | <b>n potential citations</b> | <b>n actual citations (%)</b> |
| Authority                       | low (0-2)        |                       | 2279                         | 81 (4%)                       |
|                                 | medium (2-10)    |                       | 1326                         | 108 (8%)                      |
|                                 | high (>= 10)     |                       | 1946                         | 203 (10%)                     |
| Time to Citation (in years)     | 0 – 1            |                       | 494                          | 38 (8%)                       |
|                                 | 1 – 2            |                       | 521                          | 56 (11%)                      |
|                                 | 2 – 3            |                       | 527                          | 50 (9%)                       |
|                                 | 3 – 4            |                       | 459                          | 33 (7%)                       |
|                                 | 4 – 5            |                       | 456                          | 40 (9%)                       |
|                                 | 5 – 6            |                       | 441                          | 35 (8%)                       |
|                                 | 6 – 7            |                       | 404                          | 28 (7%)                       |
|                                 | 7 – 8            |                       | 372                          | 22 (6%)                       |
|                                 | => 8             |                       | 1877                         | 90 (5%)                       |
| Self-citation                   | no               |                       | 5462                         | 365 (7%)                      |
|                                 | yes              |                       | 89                           | 27 (30%)                      |



**Table S2. Top 6 of articles (above) and authors (below) within network, based on the number of received citations up to 2017.**

| Article rank | Article's first author | Title                                                                                                                                | Year | Nr. of received citations (% of potential citations) |
|--------------|------------------------|--------------------------------------------------------------------------------------------------------------------------------------|------|------------------------------------------------------|
| 1            | Matricardi             | Cross sectional retrospective study of prevalence of atopy among Italian military students with antibodies against hepatitis A virus | 1997 | 35 (35 %)                                            |
| 2            | Bodner                 | Family size, childhood infections and atopic diseases                                                                                | 1998 | 32 (33 %)                                            |
| 3            | Matricardi             | Exposure to foodborne and orofecal microbes versus airborne viruses in relation to atopy and allergic asthma: epidemiological study  | 2000 | 32 (38 %)                                            |
| 4            | Strachan               | Family structure, neonatal infection, and hay fever in adolescence                                                                   | 1996 | 28 (26 %)                                            |
| 5            | Farooqi                | Early childhood infection and atopic disorder                                                                                        | 1998 | 21 (23 %)                                            |
| 6            | Karmaus                | Does a higher number of siblings protect against the development of allergy and asthma? A review                                     | 2002 | 19 (26 %)                                            |

  

| Author rank | Author        | Affiliation                              | Country        | Nr. of received citations (= authority) |
|-------------|---------------|------------------------------------------|----------------|-----------------------------------------|
| 1           | P. Matricardi | Consiglio Nazionale delle Ricerche, Rome | Italy          | 84                                      |
| 2           | F. Rosmini    | Istituto Superiore di Sanita, Rome       | Italy          | 84                                      |
| 3           | L. Ferrigno   | Istituto Superiore di Sanita, Rome       | Italy          | 84                                      |
| 4           | M. Rapicetta  | Istituto Superiore di Sanita, Rome       | Italy          | 67                                      |
| 5           | D. Strachan   | University of London, London             | United Kingdom | 57                                      |
| 6           | S. Bonini     | Consiglio Nazionale delle Ricerche, Rome | Italy          | 49                                      |

**Table S3. Odds ratios (95% CIs) for the chance of *empirical* publications to be cited within full network (N = 73, n = 3517).**

| <b>Publication characteristics,</b>                |                 |                      |                        |
|----------------------------------------------------|-----------------|----------------------|------------------------|
| <b>content-related</b>                             | <b>Crude OR</b> | <b>Adjusted OR *</b> | <b>R<sup>2</sup> *</b> |
| Type of Exposure (ref: both Siblings & Infections) |                 |                      | 0.04                   |
| only Number of Siblings                            | 0.5 (0.3 – 0.6) | 0.4 (0.3 – 0.5)      |                        |
| only Infection History                             | 1.0 (0.8 – 1.3) | 0.7 (0.5 – 0.9)      |                        |
| Study Outcome (ref: non-supportive results) **     |                 |                      | 0.07                   |
| mixed / unclear results                            | 1.4 (0.9 – 2.3) | 1.1 (0.7 – 1.9)      |                        |
| supportive results                                 | 4.8 (3.2 – 7.0) | 5.1 (3.3 – 7.8)      |                        |
| <b>Publication characteristics,</b>                |                 |                      |                        |
| <b>other content-related</b>                       | <b>Crude OR</b> | <b>Adjusted OR *</b> | <b>R<sup>2</sup> *</b> |
| Study Design (ref: cross-sectional)                |                 |                      | 0.02 (crude)           |
| case control                                       | 1.4 (0.9 – 2.2) |                      |                        |
| retrospective cohort                               | 0.9 (0.7 – 1.2) |                      |                        |
| prospective cohort                                 | 0.3 (0.2 – 0.5) |                      |                        |
| Sample Size (ref: low)                             |                 | ***                  | 0.02                   |
| medium                                             | 1.6 (1.2 – 2.3) | 1.6 (1.0 – 2.6)      |                        |
| high                                               | 1.6 (1.2 – 2.3) | 1.9 (1.2 – 3.0)      |                        |
| Specificity (ref: low)                             |                 |                      | 0.05                   |
| medium                                             | 4.6 (2.6 – 8.2) | 3.5 (1.8 – 6.5)      |                        |
| high                                               | 7.4 (4.5 – 12)  | 6.1 (3.5 – 10)       |                        |
| <b>Publication characteristics,</b>                |                 |                      |                        |
| <b>not content-related</b>                         | <b>Crude OR</b> | <b>Adjusted OR *</b> | <b>R<sup>2</sup> *</b> |
| Conclusive Title (yes vs no)                       | 0.3 (0.2 – 0.6) | 0.3 (0.1 – 0.5)      | 0.03                   |
| Funding Source (ref: exclusively non-profit)       |                 |                      | 0.02                   |
| profit or both profit/non-profit                   | 0.9 (0.6 – 1.2) | 0.8 (0.5 – 1.1)      |                        |
| not reported                                       | 0.8 (0.6 – 1.1) | 0.8 (0.6 – 1.1)      |                        |
| Number of Authors (ref: 1-2)                       |                 |                      | 0.03                   |
| 3 - 5                                              | 1.1 (0.7 – 1.6) | 1.2 (0.7 – 1.8)      |                        |
| >= 6                                               | 1.7 (1.2 – 2.6) | 1.8 (1.1 – 2.9)      |                        |
| Number of Affiliations (ref: 1)                    |                 |                      | 0.03                   |
| 2                                                  | 1.7 (1.2 – 2.4) | 1.8 (1.2 – 2.6)      |                        |
| >= 3                                               | 1.3 (0.9 – 1.7) | 1.6 (1.2 – 2.4)      |                        |
| Number of References (ref: <30)                    |                 |                      | 0.02                   |
| 30 - 50                                            | 0.9 (0.7 – 1.1) | 1.0 (0.7 – 1.2)      |                        |
| >= 50                                              | 0.3 (0.1 – 0.7) | 0.3 (0.1 – 0.8)      |                        |

| <b>Journal characteristics</b>             | <b>Crude OR</b> | <b>Adjusted OR *</b> | <b>R<sup>2</sup> *</b> |
|--------------------------------------------|-----------------|----------------------|------------------------|
| Journal Impact Factor (ref: 0-2, n = 3266) |                 |                      | 0.06                   |
| 2 – 4                                      | 2.8 (1.7 – 4.5) | 2.6 (1.6 – 4.3)      |                        |
| >= 4                                       | 5.9 (3.7 – 9.5) | 6.6 (4.0 – 11)       |                        |
| <b>Author characteristics</b>              | <b>Crude OR</b> | <b>Adjusted OR *</b> | <b>R<sup>2</sup> *</b> |
| Gender (female vs male, n = 3457)          | 0.6 (0.5 – 0.8) | 0.7 (0.5 – 0.9)      | 0.03                   |
| Region (ref: Europe)                       |                 |                      | 0.04                   |
| North-America                              | 0.5 (0.3–0.97)  | 0.6 (0.3 – 1.1)      |                        |
| Asia                                       | 0.2 (0.1 – 0.4) | 0.1 (0.1 – 0.3)      |                        |
| Australia / New-Zealand                    | 0.5 (0.3 – 0.8) | 0.5 (0.3 – 0.9)      |                        |
| Type of Affiliation (other vs university)  | 2.4 (1.9 – 3.2) | 2.2 (1.7 – 2.9)      | 0.04                   |
| <b>Citation characteristics</b>            | <b>Crude OR</b> | <b>Adjusted OR *</b> | <b>R<sup>2</sup> *</b> |
| Authority (ref: low)                       |                 |                      | 0.05                   |
| medium                                     | 2.0 (1.4 – 3.0) | 2.1 (1.4 – 3.0)      |                        |
| high                                       | 3.6 (2.6 – 5.1) | 3.8 (2.7 – 5.5)      |                        |

\* adjusted for study design and log sample size. \*\* both the ‘crude’ and adjusted analyses are (additionally) adjusted for type of exposure. \*\*\* only adjusted for study design. **supportive:** supportive for Strachan’s original hygiene hypothesis, i.e. inverse association between siblings/infections and allergy. **non-supportive:** no association or positive association between siblings/infections and allergy. N = number of potentially cited publications; n = number of potential citation paths.

**Table S4. Odds ratios (95% CIs) for the chance of *empirical* publications to be cited by *synthesis* publications (N = 73, n = 1097).**

| <b>Publication characteristics,</b>                |                 |                      |                        |
|----------------------------------------------------|-----------------|----------------------|------------------------|
| <b>content-related</b>                             | <b>Crude OR</b> | <b>Adjusted OR *</b> | <b>R<sup>2</sup> *</b> |
| Type of Exposure (ref: both Siblings & Infections) |                 |                      | 0.07                   |
| only Number of Siblings                            | 0.4 (0.2 – 0.7) | 0.3 (0.2 – 0.6)      |                        |
| only Infection History                             | 1.8 (1.1 – 3.0) | 1.3 (0.7 – 2.3)      |                        |
| Study Outcome (ref: non-supportive results) **     |                 |                      | 0.12                   |
| mixed / unclear results                            | 0.5 (0.2 – 1.0) | 0.4 (0.2 – 0.9)      |                        |
| supportive results                                 | 6.0 (3.1 – 12)  | 7.3 (3.5 – 15)       |                        |
| <b>Publication characteristics,</b>                |                 |                      |                        |
| <b>other content-related</b>                       | <b>Crude OR</b> | <b>Adjusted OR *</b> | <b>R<sup>2</sup> *</b> |
| Study Design (ref: cross-sectional)                |                 |                      | 0.04 (crude)           |
| case control                                       | 2.1 (1.1 – 4.2) |                      |                        |
| retrospective cohort                               | 1.0 (0.6 – 1.6) |                      |                        |
| prospective cohort                                 | 0.3 (0.1 – 0.6) |                      |                        |
| Sample Size (ref: low)                             |                 | ***                  | 0.04                   |
| medium                                             | 1.6 (0.9 – 2.8) | 1.9 (0.8 – 4.6)      |                        |
| high                                               | 1.3 (0.7 – 2.3) | 1.9 (0.8 – 4.4)      |                        |
| Specificity (ref: low)                             |                 |                      | 0.06                   |
| medium                                             | 6.9 (2.8 – 17)  | 4.3 (1.6 – 12)       |                        |
| high                                               | 7.6 (3.4 – 17)  | 5.6 (2.3 – 13)       |                        |
| <b>Publication characteristics,</b>                |                 |                      |                        |
| <b>not content-related</b>                         | <b>Crude OR</b> | <b>Adjusted OR *</b> | <b>R<sup>2</sup> *</b> |
| Conclusive Title (yes vs no)                       | 0.4 (0.2 – 0.9) | 0.2 (0.1 – 0.6)      | 0.05                   |
| Funding Source (ref: exclusively non-profit)       |                 |                      | 0.04                   |
| profit or both profit/non-profit                   | 0.7 (0.4 – 1.2) | 0.7 (0.4 – 1.3)      |                        |
| not reported                                       | 0.6 (0.4 – 1.0) | 0.5 (0.3 – 0.9)      |                        |
| Number of Authors (ref: 1-2)                       |                 |                      | 0.06                   |
| 3 - 5                                              | 0.6 (0.3 – 1.1) | 0.6 (0.3 – 1.2)      |                        |
| >= 6                                               | 1.5 (0.8 – 2.8) | 1.5 (0.7 – 3.2)      |                        |
| Number of Affiliations (ref: 1)                    |                 |                      | 0.04                   |
| 2                                                  | 1.3 (0.7 – 2.4) | 1.6 (0.8 – 3.1)      |                        |
| >= 3                                               | 1.2 (0.7 – 2.0) | 2.0 (1.1 – 3.6)      |                        |
| Number of References (ref: <30)                    |                 |                      | 0.04                   |
| 30 - 50                                            | 0.7 (0.5 – 1.1) | 0.8 (0.5 – 1.2)      |                        |
| >= 50                                              | 0.2 (0.04–0.9)  | 0.2 (0.04–1.0)       |                        |

| <b>Journal characteristics</b>             | <b>Crude OR</b> | <b>Adjusted OR *</b> | <b>R<sup>2</sup> *</b> |
|--------------------------------------------|-----------------|----------------------|------------------------|
| Journal Impact Factor (ref: 0-2, n = 1015) |                 |                      | 0.11                   |
| 2 – 4                                      | 2.6 (1.2 – 5.6) | 2.2 (1.0 – 4.9)      |                        |
| >= 4                                       | 8.2 (3.8 – 18)  | 9.2 (4.1 – 21)       |                        |
| <b>Author characteristics</b>              | <b>Crude OR</b> | <b>Adjusted OR *</b> | <b>R<sup>2</sup> *</b> |
| Gender (female vs male, n = 1079)          | 0.5 (0.3 – 0.8) | 0.6 (0.4 – 0.9)      | 0.04                   |
| Region (ref: Europe)                       |                 |                      | 0.07                   |
| North-America                              | 0.7 (0.2 – 2.2) | 0.9 (0.3 – 2.9)      |                        |
| Asia                                       | 0.2 (0.1 – 0.7) | 0.1 (0.02–0.3)       |                        |
| Australia / New-Zealand                    | 0.2 (0.1 – 0.6) | 0.2 (0.9 – 0.7)      |                        |
| Type of Affiliation (other vs university)  | 3.3 (2.2 – 5.1) | 3.1 (2.0 – 4.8)      | 0.07                   |
| <b>Citation characteristics</b>            | <b>Crude OR</b> | <b>Adjusted OR *</b> | <b>R<sup>2</sup> *</b> |
| Authority (ref: low)                       |                 |                      | 0.07                   |
| medium                                     | 2.6 (1.4 – 4.6) | 2.7 (1.4 – 5.1)      |                        |
| high                                       | 4.0 (2.3 – 7.1) | 4.1 (2.2 – 7.6)      |                        |

\* adjusted for study design and log sample size. \*\* both the 'crude' and adjusted analyses are (additionally) adjusted for type of exposure. \*\*\* only adjusted for study design. **supportive:** supportive for Strachan's original hygiene hypothesis, i.e. inverse association between siblings/infections and allergy. **non-supportive:** no association or positive association between siblings/infections and allergy. N = number of potentially cited (*empirical*) publications; n = number of potential citation paths.

**Table S5. Sensitivity analyses on odds ratios (95% CIs) for the chance of being cited within full network, without the four most cited publications. N = 106, n = 5164).**

| <b>Publication characteristics,</b>                |                 |                      |                        |
|----------------------------------------------------|-----------------|----------------------|------------------------|
| <b>content-related</b>                             | <b>Crude OR</b> | <b>Adjusted OR *</b> | <b>R<sup>2</sup> *</b> |
| Type of Exposure (ref: both Siblings & Infections) |                 |                      | 0.08                   |
| only Number of Siblings                            | 1.4 (1.0 – 1.9) | 0.9 (0.6 – 1.3)      |                        |
| only Infection History                             | 1.0 (0.8 – 1.4) | 1.0 (0.7 – 1.4)      |                        |
| Study Outcome (ref: non-supportive results) **     |                 |                      | 0.08                   |
| mixed / unclear results                            | 0.8 (0.5 – 1.1) | 1.2 (0.8 – 2.0)      |                        |
| supportive results                                 | 1.0 (0.7 – 1.5) | 1.5 (1.0 – 2.2)      |                        |
| <b>Publication characteristics,</b>                |                 |                      |                        |
| <b>other content-related</b>                       | <b>Crude OR</b> | <b>Adjusted OR *</b> | <b>R<sup>2</sup> *</b> |
| Publication Type (empirical vs synthesis)          | 2.9 (2.1 – 3.9) |                      | 0.03 (crude)           |
| Study Design (ref: cross-sectional)                |                 |                      | 0.08 (crude)           |
| case control                                       | 0.3 (0.1 – 0.8) |                      |                        |
| retrospective cohort                               | 1.1 (0.8 – 1.5) |                      |                        |
| prospective cohort                                 | 0.5 (0.3 – 0.8) |                      |                        |
| narrative review                                   | 0.1 (0.1 – 0.2) |                      |                        |
| systematic review                                  | 4.5 (2.5 – 8.0) |                      |                        |
| editorial / other                                  | 0.4 (0.2 – 0.7) |                      |                        |
| Sample Size (ref: low, n = 3130)                   |                 | ***                  | 0.02                   |
| medium                                             | 2.3 (1.4 – 3.7) | 1.6 (0.9 – 2.9)      |                        |
| high                                               | 3.3 (2.1 – 5.3) | 2.5 (1.5 – 4.2)      |                        |
| Specificity (ref: low)                             |                 |                      | 0.09                   |
| medium                                             | 2.4 (1.5 – 3.9) | 3.3 (1.9 – 5.6)      |                        |
| high                                               | 5.6 (3.6 – 8.7) | 3.5 (2.1 – 5.6)      |                        |
| <b>Publication characteristics,</b>                |                 |                      |                        |
| <b>not content-related</b>                         | <b>Crude OR</b> | <b>Adjusted OR *</b> | <b>R<sup>2</sup> *</b> |
| Conclusive Title (yes vs no)                       | 0.6 (0.4 – 1.0) | 0.5 (0.3 – 0.9)      | 0.08                   |
| Funding Source (ref: exclusively non-profit)       |                 |                      | 0.08                   |
| profit or both profit/non-profit                   | 1.4 (1.0 – 2.0) | 1.4 (0.9 – 2.0)      |                        |
| not reported                                       | 0.5 (0.4 – 0.7) | 1.0 (0.7 – 1.4)      |                        |
| Number of Authors (ref: 1-2)                       |                 |                      | 0.08                   |
| 3 - 5                                              | 1.2 (0.9 – 1.7) | 0.7 (0.5 – 1.1)      |                        |
| >= 6                                               | 2.0 (1.4 – 2.8) | 0.9 (0.6 – 1.4)      |                        |
| Number of Affiliations (ref: 1)                    |                 |                      | 0.08                   |
| 2                                                  | 1.8 (1.3 – 2.5) | 1.1 (0.8 – 1.6)      |                        |
| >= 3                                               | 1.0 (0.7 – 1.4) | 0.6 (0.4 – 0.9)      |                        |

|                                            |                 |                 |      |
|--------------------------------------------|-----------------|-----------------|------|
| Number of References (ref: <30)            |                 |                 | 0.08 |
| 30 - 50                                    | 0.9 (0.7 – 1.2) | 0.7 (0.6 – 1.0) |      |
| >= 50                                      | 0.6 (0.4 – 0.8) | 0.8 (0.5 – 1.3) |      |
| <b>Journal characteristics</b>             |                 |                 |      |
| Journal Impact Factor (ref: 0-2, n = 4752) |                 |                 | 0.09 |
| 2 – 4                                      | 2.8 (1.8 – 4.3) | 2.5 (1.6 – 3.9) |      |
| >= 4                                       | 4.0 (2.6 – 6.1) | 3.5 (2.2 – 5.5) |      |
| <b>Author characteristics</b>              |                 |                 |      |
| Gender (female vs male, n = 5005)          |                 |                 | 0.07 |
| Region (ref: Europe)                       |                 |                 | 0.08 |
| North-America                              | 1.2 (0.8 – 1.8) | 1.0 (0.6 – 1.6) |      |
| Asia                                       | 0.4 (0.2 – 0.8) | 0.4 (0.2 – 0.8) |      |
| Australia / New-Zealand                    | 0.8 (0.5 – 1.2) | 0.7 (0.5 – 1.2) |      |
| Type of Affiliation (other vs university)  |                 |                 | 0.08 |
| <b>Citation characteristics</b>            |                 |                 |      |
| Authority (ref: low)                       |                 |                 | 0.08 |
| medium                                     | 2.1 (1.5 – 2.9) | 1.6 (1.1 – 2.2) |      |
| high                                       | 2.2 (1.6 – 3.0) | 1.6 (1.1 – 2.2) |      |

In these sensitivity analyses, the four most cited publications shown in Table S2 are excluded as *cited* publications; they are still included as *citing* publications. \* adjusted for study design and log sample size. \*\* both the 'crude' and adjusted analyses are (additionally) adjusted for type of exposure. \*\*\* only adjusted for study design. **supportive:** supportive for Strachan's original hygiene hypothesis, i.e. inverse association between siblings/infections and allergy. **non-supportive:** no association or positive association between siblings/infections and allergy. N = number of potentially cited publications; n = number of potential citation paths.

**Table S6. Sensitivity analyses on odds ratios (95% CIs) for the chance of being cited within full network, with a 1-year time lag between cited and citing publication. (N = 110, n = 5057).**

| <b>Publication characteristics,</b>                |                 |                      |                        |
|----------------------------------------------------|-----------------|----------------------|------------------------|
| <b>content-related</b>                             | <b>Crude OR</b> | <b>Adjusted OR *</b> | <b>R<sup>2</sup> *</b> |
| Type of Exposure (ref: both Siblings & Infections) |                 |                      | 0.11                   |
| only Number of Siblings                            | 0.7 (0.5 – 1.0) | 0.4 (0.3 – 0.7)      |                        |
| only Infection History                             | 1.2 (1.0 – 1.6) | 0.8 (0.6 – 1.1)      |                        |
| Study Outcome (ref: non-supportive results) **     |                 |                      | 0.12                   |
| mixed / unclear results                            | 1.2 (0.8 – 1.7) | 2.2 (1.4 – 3.5)      |                        |
| supportive results                                 | 1.7 (1.2 – 2.4) | 3.2 (2.2 – 4.6)      |                        |
| <b>Publication characteristics,</b>                |                 |                      |                        |
| <b>other content-related</b>                       | <b>Crude OR</b> | <b>Adjusted OR *</b> | <b>R<sup>2</sup> *</b> |
| Publication Type (empirical vs synthesis)          | 4.4 (3.2 – 6.0) |                      | 0.05 (crude)           |
| Study Design (ref: cross-sectional)                |                 |                      | 0.09 (crude)           |
| case control                                       | 1.4 (0.9 – 2.2) |                      |                        |
| retrospective cohort                               | 0.9 (0.7 – 1.2) |                      |                        |
| prospective cohort                                 | 0.3 (0.2 – 0.5) |                      |                        |
| narrative review                                   | 0.1 (0.0 – 0.1) |                      |                        |
| systematic review                                  | 3.4 (1.9 – 6.2) |                      |                        |
| editorial / other                                  | 0.3 (0.1 – 0.4) |                      |                        |
| Sample Size (ref: low, n = 3199)                   |                 |                      | 0.02                   |
| medium                                             | 1.6 (1.1 – 2.2) | 1.4 (0.8 – 2.4)      |                        |
| high                                               | 1.4 (1.0 – 2.1) | 1.6 (0.9 – 2.6)      |                        |
| Specificity (ref: low)                             |                 |                      | 0.12                   |
| medium                                             | 2.8 (1.6 – 4.7) | 3.1 (1.7 – 5.6)      |                        |
| high                                               | 10.3 (6.4 – 17) | 6.1 (3.6 – 10)       |                        |



| <b>Publication characteristics,</b>          |                 |                      |                        |
|----------------------------------------------|-----------------|----------------------|------------------------|
| <b>not content-related</b>                   | <b>Crude OR</b> | <b>Adjusted OR *</b> | <b>R<sup>2</sup> *</b> |
| Conclusive Title (yes vs no)                 | 0.5 (0.3 – 0.8) | 0.3 (0.2 – 0.5)      | 0.10                   |
| Funding Source (ref: exclusively non-profit) |                 |                      | 0.10                   |
| profit or both profit/non-profit             | 0.8 (0.6 – 1.2) | 0.8 (0.5 – 1.1)      |                        |
| not reported                                 | 0.4 (0.3 – 0.5) | 0.8 (0.6 – 1.1)      |                        |
| Number of Authors (ref: 1-2)                 |                 |                      | 0.10                   |
| 3 - 5                                        | 2.0 (1.5 – 2.8) | 1.1 (0.7 – 1.8)      |                        |
| >= 6                                         | 3.7 (2.7 – 5.0) | 1.7 (1.0 – 2.6)      |                        |
| Number of Affiliations (ref: 1)              |                 |                      | 0.10                   |
| 2                                            | 3.0 (2.2 – 4.1) | 2.1 (1.4 – 3.0)      |                        |
| >= 3                                         | 2.2 (1.7 – 2.9) | 1.7 (1.2 – 2.3)      |                        |
| Number of References (ref: <30)              |                 |                      | 0.09                   |
| 30 - 50                                      | 1.1 (0.9 – 1.4) | 1.0 (0.8 – 1.3)      |                        |
| >= 50                                        | 0.5 (0.3 – 0.7) | 0.7 (0.4 – 1.3)      |                        |
| <b>Journal characteristics</b>               |                 |                      |                        |
|                                              | <b>Crude OR</b> | <b>Adjusted OR *</b> | <b>R<sup>2</sup> *</b> |
| Journal Impact Factor (ref: 0-2, n = 4580)   |                 |                      | 0.12                   |
| 2 – 4                                        | 3.2 (2.0 – 4.9) | 2.5 (1.6 – 4.0)      |                        |
| >= 4                                         | 5.4 (3.5 – 8.4) | 4.5 (2.9 – 7.1)      |                        |
| <b>Author characteristics</b>                |                 |                      |                        |
|                                              | <b>Crude OR</b> | <b>Adjusted OR *</b> | <b>R<sup>2</sup> *</b> |
| Gender (female vs male, n = 4913)            | 0.8 (0.6 – 1.0) | 0.7 (0.6 – 1.0)      | 0.09                   |
| Region (ref: Europe)                         |                 |                      | 0.11                   |
| North-America                                | 1.0 (0.7 – 1.5) | 1.0 (0.6 – 1.8)      |                        |
| Asia                                         | 0.3 (0.2 – 0.7) | 0.2 (0.1 – 0.4)      |                        |
| Australia / New-Zealand                      | 0.5 (0.3 – 0.9) | 0.5 (0.3 – 0.9)      |                        |
| Type of Affiliation (other vs university)    | 2.3 (1.8 – 2.9) | 1.9 (1.5 – 2.5)      | 0.10                   |
| <b>Citation characteristics</b>              |                 |                      |                        |
|                                              | <b>Crude OR</b> | <b>Adjusted OR *</b> | <b>R<sup>2</sup> *</b> |
| Authority (ref: low)                         |                 |                      | 0.11                   |
| medium                                       | 2.8 (1.9 – 3.9) | 1.9 (1.3 – 2.7)      |                        |
| high                                         | 4.0 (2.9 – 5.5) | 2.8 (2.0 – 4.0)      |                        |

\* adjusted for study design. \*\* both the 'crude' and adjusted analyses are (additionally) adjusted for type of exposure. **supportive:** supportive for Strachan's original hygiene hypothesis, i.e. inverse association between siblings/infections and allergy. **non-supportive:** no association or positive association between siblings/infections and allergy. **N:** number of publications. **n:** number of potential citation paths.

**Table S7. Sensitivity analyses on odds ratios (95% CIs) for the chance of being cited, without citing publications with less than 10 potential citation paths (N = 110, n = 5507).**

| <b>Publication characteristics,</b>                |                 |                      |                        |
|----------------------------------------------------|-----------------|----------------------|------------------------|
| <b>content-related</b>                             | <b>Crude OR</b> | <b>Adjusted OR *</b> | <b>R<sup>2</sup> *</b> |
| Type of Exposure (ref: both Siblings & Infections) |                 |                      | 0.10                   |
| only Number of Siblings                            | 0.8 (0.6 – 1.1) | 0.5 (0.4 – 0.7)      |                        |
| only Infection History                             | 1.2 (1.0 – 1.6) | 0.8 (0.6 – 1.1)      |                        |
| Study Outcome (ref: non-supportive results) **     |                 |                      | 0.12                   |
| mixed / unclear results                            | 1.2 (0.8 – 1.7) | 2.3 (1.5 – 3.6)      |                        |
| supportive results                                 | 1.7 (1.3 – 2.4) | 3.0 (2.1 – 4.2)      |                        |
| <b>Publication characteristics,</b>                |                 |                      |                        |
| <b>other content-related</b>                       | <b>Crude OR</b> | <b>Adjusted OR *</b> | <b>R<sup>2</sup> *</b> |
| Publication Type (empirical vs synthesis)          | 4.2 (3.1 – 5.6) |                      | 0.04 (crude)           |
| Study Design (ref: cross-sectional)                |                 |                      | 0.09 (crude)           |
| case control                                       | 1.4 (1.0 – 2.2) |                      |                        |
| retrospective cohort                               | 0.8 (0.6 – 1.1) |                      |                        |
| prospective cohort                                 | 0.4 (0.2 – 0.5) |                      |                        |
| narrative review                                   | 0.1 (0.0 – 0.1) |                      |                        |
| systematic review                                  | 3.3 (1.8 – 5.8) |                      |                        |
| editorial / other                                  | 0.3 (0.2 – 0.4) |                      |                        |
| Sample Size (ref: low, n = 3423)                   |                 |                      | 0.02                   |
| medium                                             | 1.5 (1.1 – 2.1) | 1.5 (0.9 – 2.5)      |                        |
| high                                               | 1.4 (1.0 – 2.0) | 1.7 (1.1 – 2.8)      |                        |
| Specificity (ref: low)                             |                 |                      | 0.11                   |
| medium                                             | 2.2 (1.4 – 3.6) | 2.5 (1.4 – 4.2)      |                        |
| high                                               | 8.6 (5.6 – 13)  | 4.9 (3.1 – 7.9)      |                        |

| <b>Publication characteristics,</b>          |                 |                      |                        |
|----------------------------------------------|-----------------|----------------------|------------------------|
| <b>not content-related</b>                   | <b>Crude OR</b> | <b>Adjusted OR *</b> | <b>R<sup>2</sup> *</b> |
| Conclusive Title (yes vs no)                 | 0.4 (0.3 – 0.7) | 0.3 (0.2 – 0.5)      | 0.10                   |
| Funding Source (ref: exclusively non-profit) |                 |                      | 0.09                   |
| profit or both profit/non-profit             | 0.9 (0.6 – 1.3) | 0.8 (0.6 – 1.2)      |                        |
| not reported                                 | 0.4 (0.3 – 0.5) | 0.7 (0.5 – 1.0)      |                        |
| Number of Authors (ref: 1-2)                 |                 |                      | 0.09                   |
| 3 - 5                                        | 2.0 (1.5 – 2.7) | 1.1 (0.7 – 1.7)      |                        |
| >= 6                                         | 3.8 (2.8 – 5.2) | 1.7 (1.1 – 2.6)      |                        |
| Number of Affiliations (ref: 1)              |                 |                      | 0.09                   |
| 2                                            | 2.8 (2.1 – 3.7) | 1.9 (1.3 – 2.6)      |                        |
| >= 3                                         | 2.2 (1.7 – 2.9) | 1.6 (1.2 – 2.3)      |                        |
| Number of References (ref: <30)              |                 |                      | 0.09                   |
| 30 - 50                                      | 1.0 (0.8 – 1.3) | 0.9 (0.7 – 1.2)      |                        |
| >= 50                                        | 0.4 (0.3 – 0.6) | 0.8 (0.4 – 1.3)      |                        |
| <b>Journal characteristics</b>               |                 |                      |                        |
|                                              | <b>Crude OR</b> | <b>Adjusted OR *</b> | <b>R<sup>2</sup> *</b> |
| Journal Impact Factor (ref: 0-2, n = 4955)   |                 |                      | 0.11                   |
| 2 – 4                                        | 3.2 (2.1 – 5.0) | 2.5 (1.6 – 3.9)      |                        |
| >= 4                                         | 5.7 (3.8 – 8.8) | 4.6 (3.0 – 7.2)      |                        |
| <b>Author characteristics</b>                |                 |                      |                        |
|                                              | <b>Crude OR</b> | <b>Adjusted OR *</b> | <b>R<sup>2</sup> *</b> |
| Gender (female vs male, n = 5350)            | 0.8 (0.6 – 1.0) | 0.8 (0.6 – 1.0)      | 0.09                   |
| Region (ref: Europe)                         |                 |                      | 0.11                   |
| North-America                                | 0.9 (0.6 – 1.3) | 0.9 (0.5 – 1.4)      |                        |
| Asia                                         | 0.3 (0.2 – 0.6) | 0.2 (0.1 – 0.4)      |                        |
| Australia / New-Zealand                      | 0.5 (0.3 – 0.8) | 0.5 (0.3 – 0.8)      |                        |
| Type of Affiliation (other vs university)    | 2.4 (1.9 – 3.0) | 2.0 (1.6 – 2.6)      | 0.10                   |
| <b>Citation characteristics</b>              |                 |                      |                        |
|                                              | <b>Crude OR</b> | <b>Adjusted OR *</b> | <b>R<sup>2</sup> *</b> |
| Authority (ref: low)                         |                 |                      | 0.11                   |
| medium                                       | 2.4 (1.8 – 3.3) | 1.8 (1.3 – 2.5)      |                        |
| high                                         | 3.8 (2.9 – 5.1) | 2.9 (2.2 – 4.0)      |                        |

\* adjusted for study design. \*\* both the 'crude' and adjusted analyses are (additionally) adjusted for type of exposure. **supportive:** supportive for Strachan's original hygiene hypothesis, i.e. inverse association between siblings/infections and allergy. **non-supportive:** no association or positive association between siblings/infections and allergy. **N:** number of publications. **n:** number of potential citation paths.
